# Supplementary material for: Naphthylisoindolinone alkaloids: the first ring-contracted naphthylisoquinolines, from the tropical liana Ancistrocladus abbreviatus, with cytotoxic activity
Source: Royal Society of Chemistry journal article supplement (doi:10.1039/d2ra05758a), 2022-01-01
Supplement: d2ra05758a1.pdf [file d2ra05758a1.pdf]

## Electronic Supplementary Information (ESI)

# **Naphthylisoindolinone Alkaloids: The First Ring-Contracted Naphthylisoquinolines, from the Tropical Liana *Ancistrocladus abbreviatus*, with Cytotoxic Activity**

Shaimaa Fayez,<sup>a,b</sup> Torsten Bruhn,<sup>c</sup> Doris Feineis,<sup>a</sup> Laurent Aké Assi,<sup>d,||</sup>  
Prem Prakash Kushwaha,<sup>e</sup> Shashank Kumar,<sup>e</sup> and Gerhard Bringmann<sup>a,\*</sup>

<sup>a</sup> Institute of Organic Chemistry, University of Würzburg, Am Hubland, D-97074 Würzburg, Germany

<sup>b</sup> Department of Pharmacognosy, Faculty of Pharmacy, Ain-Shams University, Organization of African Unity Street 1, 11566 Cairo, Egypt

<sup>c</sup> Federal Institute for Risk Assessment, Max-Dohrn-Str. 8-10, D-10589 Berlin, Germany

<sup>d</sup> Centre National de Floristique, Conservatoire et Jardin Botaniques, Université d'Abidjan, Abidjan 08, Ivory Coast

<sup>e</sup> Molecular Signaling & Drug Discovery Laboratory, Department of Biochemistry, Central University of Punjab, Bathinda-151401, Punjab, India

|| Deceased on January 14, 2014.

\* Corresponding author. E-mail address: [bringman@chemie.uni-wuerzburg.de](mailto:bringman@chemie.uni-wuerzburg.de) (G. Bringmann)

## Table of Contents

|                                                                                                                             |      |
|-----------------------------------------------------------------------------------------------------------------------------|------|
| <b>1. General Procedure for Oxidative Degradation of Naphthylisoindolinone Alkaloids on an Analytical Scale</b>             | P-4  |
| <b>2. Ancistrobrevoline A (14)</b>                                                                                          |      |
| (S1) <sup>1</sup> H NMR spectrum of ancistrobrevoline A ( <b>14</b> ) in methanol- <i>d</i> <sub>4</sub>                    | P-6  |
| (S2) <sup>13</sup> C NMR spectrum of ancistrobrevoline A ( <b>14</b> ) in methanol- <i>d</i> <sub>4</sub>                   | P-7  |
| (S3) <sup>13</sup> C DEPT 135 NMR spectrum of ancistrobrevoline A ( <b>14</b> ) in methanol- <i>d</i> <sub>4</sub>          | P-8  |
| (S4) <sup>1</sup> H- <sup>1</sup> H COSY spectrum of ancistrobrevoline A ( <b>14</b> ) in methanol- <i>d</i> <sub>4</sub>   | P-9  |
| (S5) <sup>1</sup> H- <sup>1</sup> H NOESY spectrum of ancistrobrevoline A ( <b>14</b> ) in methanol- <i>d</i> <sub>4</sub>  | P-10 |
| (S6) <sup>1</sup> H- <sup>13</sup> C HSQC spectrum of ancistrobrevoline A ( <b>14</b> ) in methanol- <i>d</i> <sub>4</sub>  | P-11 |
| (S7) <sup>1</sup> H- <sup>13</sup> C HMBC spectrum of ancistrobrevoline A ( <b>14</b> ) in methanol- <i>d</i> <sub>4</sub>  | P-12 |
| (S8) HR-ESI-MS spectrum of ancistrobrevoline A ( <b>14</b> )                                                                | P-13 |
| (S9) IR spectrum of ancistrobrevoline A ( <b>14</b> )                                                                       | P-14 |
| (S10) ECD spectrum of ancistrobrevoline A ( <b>14</b> )                                                                     | P-15 |
| (S11) Oxidative degradation of ancistrobrevoline A ( <b>14</b> )                                                            | P-16 |
| <b>3. Ancistrobrevoline B (15)</b>                                                                                          |      |
| (S12) <sup>1</sup> H NMR spectrum of ancistrobrevoline B ( <b>15</b> ) in methanol- <i>d</i> <sub>4</sub>                   | P-17 |
| (S13) <sup>13</sup> C NMR spectrum of ancistrobrevoline B ( <b>15</b> ) in methanol- <i>d</i> <sub>4</sub>                  | P-18 |
| (S14) <sup>13</sup> C DEPT 135 NMR spectrum of ancistrobrevoline B ( <b>15</b> ) in methanol- <i>d</i> <sub>4</sub>         | P-19 |
| (S15) <sup>1</sup> H- <sup>1</sup> H COSY spectrum of ancistrobrevoline B ( <b>15</b> ) in methanol- <i>d</i> <sub>4</sub>  | P-20 |
| (S16) <sup>1</sup> H- <sup>1</sup> H NOESY spectrum of ancistrobrevoline B ( <b>15</b> ) in methanol- <i>d</i> <sub>4</sub> | P-21 |
| (S17) <sup>1</sup> H- <sup>13</sup> C HSQC spectrum of ancistrobrevoline B ( <b>15</b> ) in methanol- <i>d</i> <sub>4</sub> | P-22 |
| (S18) <sup>1</sup> H- <sup>13</sup> C HMBC spectrum of ancistrobrevoline B ( <b>15</b> ) in methanol- <i>d</i> <sub>4</sub> | P-23 |
| (S19) HR-ESI-MS spectrum of ancistrobrevoline B ( <b>15</b> )                                                               | P-24 |
| (S20) IR spectrum of ancistrobrevoline B ( <b>15</b> )                                                                      | P-25 |
| (S21) ECD spectrum of ancistrobrevoline B ( <b>15</b> )                                                                     | P-26 |
| (S22) Oxidative degradation of ancistrobrevoline B ( <b>15</b> )                                                            | P-27 |

#### 4. Ancistrobrevoline C (16)

|       |                                                                                                              |      |
|-------|--------------------------------------------------------------------------------------------------------------|------|
| (S23) | <sup>1</sup> H NMR spectrum of ancistrobrevoline C (16) in methanol- <i>d</i> <sub>4</sub>                   | P-28 |
| (S24) | <sup>13</sup> C NMR spectrum of ancistrobrevoline C (16) in methanol- <i>d</i> <sub>4</sub>                  | P-29 |
| (S25) | <sup>13</sup> C DEPT 135 NMR spectrum of ancistrobrevoline C (16) in methanol- <i>d</i> <sub>4</sub>         | P-30 |
| (S26) | <sup>1</sup> H- <sup>1</sup> H COSY spectrum of ancistrobrevoline C (16) in methanol- <i>d</i> <sub>4</sub>  | P-31 |
| (S27) | <sup>1</sup> H- <sup>1</sup> H NOESY spectrum of ancistrobrevoline C (16) in methanol- <i>d</i> <sub>4</sub> | P-32 |
| (S28) | <sup>1</sup> H- <sup>13</sup> C HSQC spectrum of ancistrobrevoline C (16) in methanol- <i>d</i> <sub>4</sub> | P-33 |
| (S29) | <sup>1</sup> H- <sup>13</sup> C HMBC spectrum of ancistrobrevoline C (16) in methanol- <i>d</i> <sub>4</sub> | P-34 |
| (S30) | HR-ESI-MS spectrum of ancistrobrevoline C (16)                                                               | P-35 |
| (S31) | IR spectrum of ancistrobrevoline C (16)                                                                      | P-36 |
| (S32) | ECD spectrum of ancistrobrevoline C (16)                                                                     | P-37 |
| (S33) | Oxidative degradation of ancistrobrevoline C (16)                                                            | P-38 |

#### 5. Ancistrobrevoline D (17)

|       |                                                                                                              |      |
|-------|--------------------------------------------------------------------------------------------------------------|------|
| (S34) | <sup>1</sup> H NMR spectrum of ancistrobrevoline D (17) in methanol- <i>d</i> <sub>4</sub>                   | P-39 |
| (S35) | <sup>13</sup> C NMR spectrum of ancistrobrevoline D (17) in methanol- <i>d</i> <sub>4</sub>                  | P-40 |
| (S36) | <sup>13</sup> C DEPT 135 NMR spectrum of ancistrobrevoline D (17) in methanol- <i>d</i> <sub>4</sub>         | P-41 |
| (S37) | <sup>1</sup> H- <sup>1</sup> H COSY spectrum of ancistrobrevoline D (17) in methanol- <i>d</i> <sub>4</sub>  | P-42 |
| (S38) | <sup>1</sup> H- <sup>1</sup> H NOESY spectrum of ancistrobrevoline D (17) in methanol- <i>d</i> <sub>4</sub> | P-43 |
| (S39) | <sup>1</sup> H- <sup>13</sup> C HSQC spectrum of ancistrobrevoline D (17) in methanol- <i>d</i> <sub>4</sub> | P-44 |
| (S40) | <sup>1</sup> H- <sup>13</sup> C HMBC spectrum of ancistrobrevoline D (17) in methanol- <i>d</i> <sub>4</sub> | P-45 |
| (S41) | HR-ESI-MS spectrum of ancistrobrevoline D (17)                                                               | P-46 |
| (S42) | IR spectrum of ancistrobrevoline D (17)                                                                      | P-47 |
| (S43) | ECD spectrum of ancistrobrevoline D (17)                                                                     | P-48 |
| (S44) | Oxidative degradation of ancistrobrevoline D (17)                                                            | P-49 |

## 1. General Procedure for Oxidative Degradation of Naphthylisoindolinone Alkaloids on an Analytical Scale

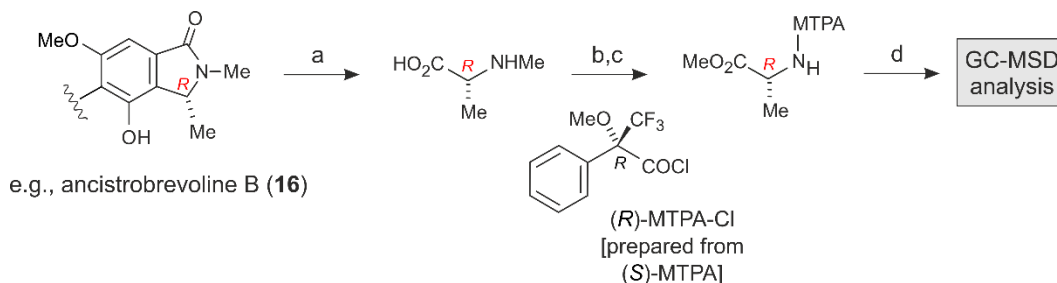

**Scheme:** Oxidative degradation of ancistrobrevoline B (**16**) to give readily analyzable *N*-methyl-D-alanine: (a) RuCl<sub>3</sub>, NaIO<sub>4</sub>; (b) SOCl<sub>2</sub>, MeOH; (c) (*R*)-MTPA-Cl (Mosher's chloride); (d) stereoanalysis of the Mosher derivative of the methyl ester of *N*-methyl-D-alanine by GC-MSD.

The naphthylisoindolinone alkaloids ancistrobrevolines A-D (**14-17**) were subjected to a ruthenium(VIII)-mediated periodate degradation following a miniaturized procedure (see Scheme) as described earlier (G. Bringmann, R. God and M. Schäffer, *Phytochemistry*, 1996, **43**, 1393-1403). with subsequent derivatization of the resulting amino acid *N*-methylalanine with CH<sub>3</sub>OH/HCl and (*R*)- $\alpha$ -trifluoromethylphenyl-acetylchloride [(*R*)-MTPA-Cl, prepared from (*S*)-MTPA]. The absolute configurations of **14-17** at the stereogenic center at C-1 were assigned by gas chromatography (GC) on a dimethylpolysiloxane-coated capillary column coupled to a mass-selective detector (MSD) and comparison with the corresponding derivatives of the authentic amino acids *N*-methyl-D-alanine and *N*-methyl-L-alanine.

Reactions were performed in 2.5 mL Wheaton screw-cap vials. The pure ancistrobrevolines (ca. 0.5 mg each) and 0.1 mg of RuCl<sub>3</sub>·H<sub>2</sub>O (as catalyst) were added with stirring to a two-phase mixture consisting of MeCN (100  $\mu$ L), CCl<sub>4</sub> (100  $\mu$ L), and 0.1 M sodium phosphate buffer (pH 6.0) (200  $\mu$ L) at room temperature. Over a period of 60 min, 26 mg of NaIO<sub>4</sub> were added in several portions and the mixture was allowed to stir at room temperature for another 1.5 h. For extraction of the resulting *N*-methylalanine, H<sub>2</sub>O (700  $\mu$ L) were added and after a short period of additional stirring (10 min), the aqueous phase was separated, washed ( $\times$  2) with 300  $\mu$ L portions of CHCl<sub>3</sub> and then lyophilized. The residue was extracted with dry MeOH (1.5 mL) followed by separation of the insoluble inorganic salts by centrifugation, providing a methanolic solution of the resulting amino acids, which was submitted to esterification. For this purpose, freshly

distilled  $\text{SOCl}_2$  (70  $\mu\text{L}$ ) was added dropwise at  $0^\circ\text{C}$  with vigorously stirring. The mixture was then allowed to stand at room temperature for 12 h and another portion of  $\text{SOCl}_2$  (70  $\mu\text{L}$ ) was added in the same manner. After 6 h standing at room temperature and evaporation of the solvent, the residue was suspended in dry  $\text{CH}_2\text{Cl}_2$  (500  $\mu\text{L}$ ), with subsequent addition of 0.2 M (*R*)-MTPA-Cl in  $\text{CH}_2\text{Cl}_2$  (100  $\mu\text{L}$ ) and up to 20  $\mu\text{L}$  of  $\text{NEt}_3$  until the mixture became alkaline. After stirring for 30 min, 1  $\mu\text{L}$  of the resulting mixture was used directly for GC-MSD analysis on a non-polar fused silica capillary column (HP Ultra 2, 25 m  $\times$  0.32 mm  $\times$  0.52  $\mu\text{m}$ ). Helium was used as carrier gas with a column head pressure of 40 kPa. For chromatographic separation, an on-column injector maintained at  $210^\circ\text{C}$  was used, with the column temperature program  $100^\circ\text{C}$ – $160^\circ\text{C}$  ( $30^\circ\text{C}/\text{min}$ ), then  $160^\circ\text{C}$ – $190^\circ\text{C}$  ( $1^\circ\text{C}/\text{min}$ ) and finally increased to  $270^\circ\text{C}$  ( $40^\circ\text{C}/\text{min}$ ).

Comparison with the respective derivatives of authentic amino acids of known configuration (from a test racemate routinely used for the analysis of usual naphthylisoquinoline alkaloids consisting of *N*-methylalanine, 3-aminobutyric acid, and *N*-methyl-3-aminobutyric acid) finally provided direct information about the absolute configuration at the chiral center at C1 of ancistrobrevoline A (**14**) (see Figure S11), ancistrobrevoline B (**15**) (see Figure S22), ancistrobrevoline C (**16**) (see Figure S33), and ancistrobrevoline D (**17**) (see Figure S44).

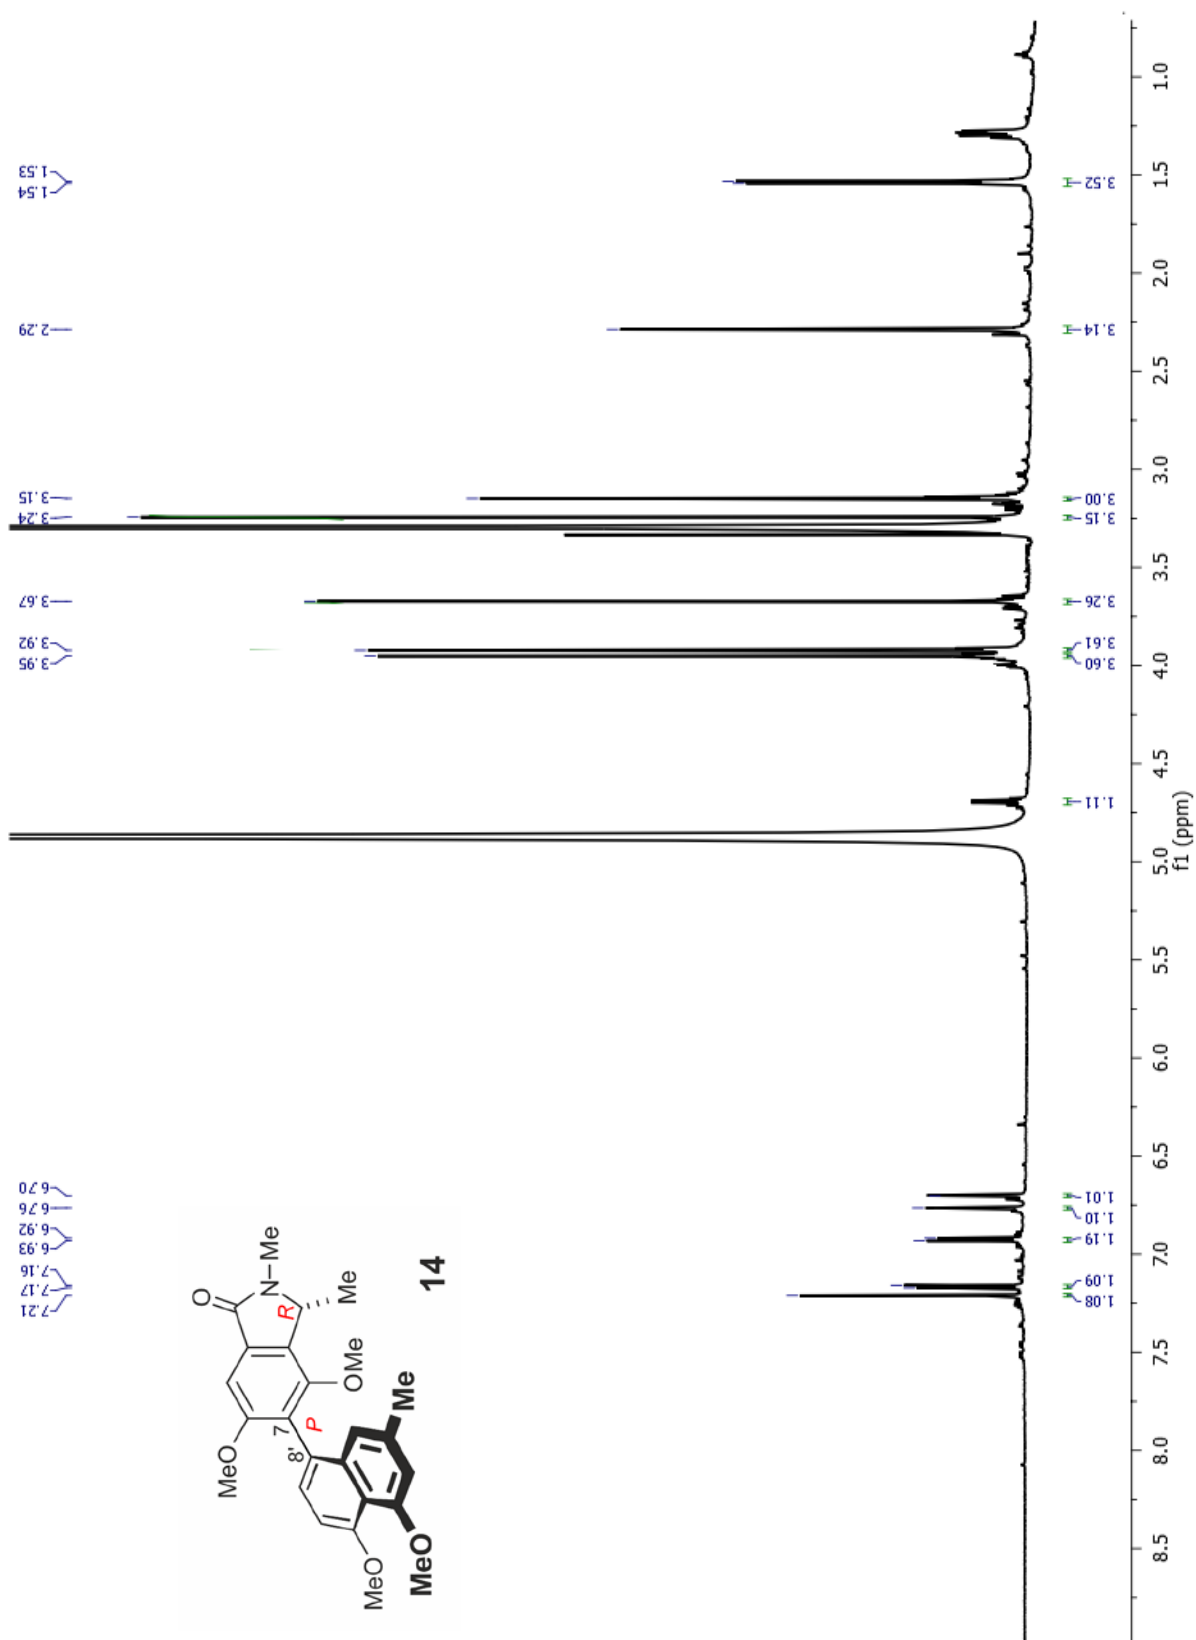

**Figure S1:** <sup>1</sup>H NMR spectrum of ancistrobrevoline A (**14**) in methanol-*d*<sub>4</sub>.

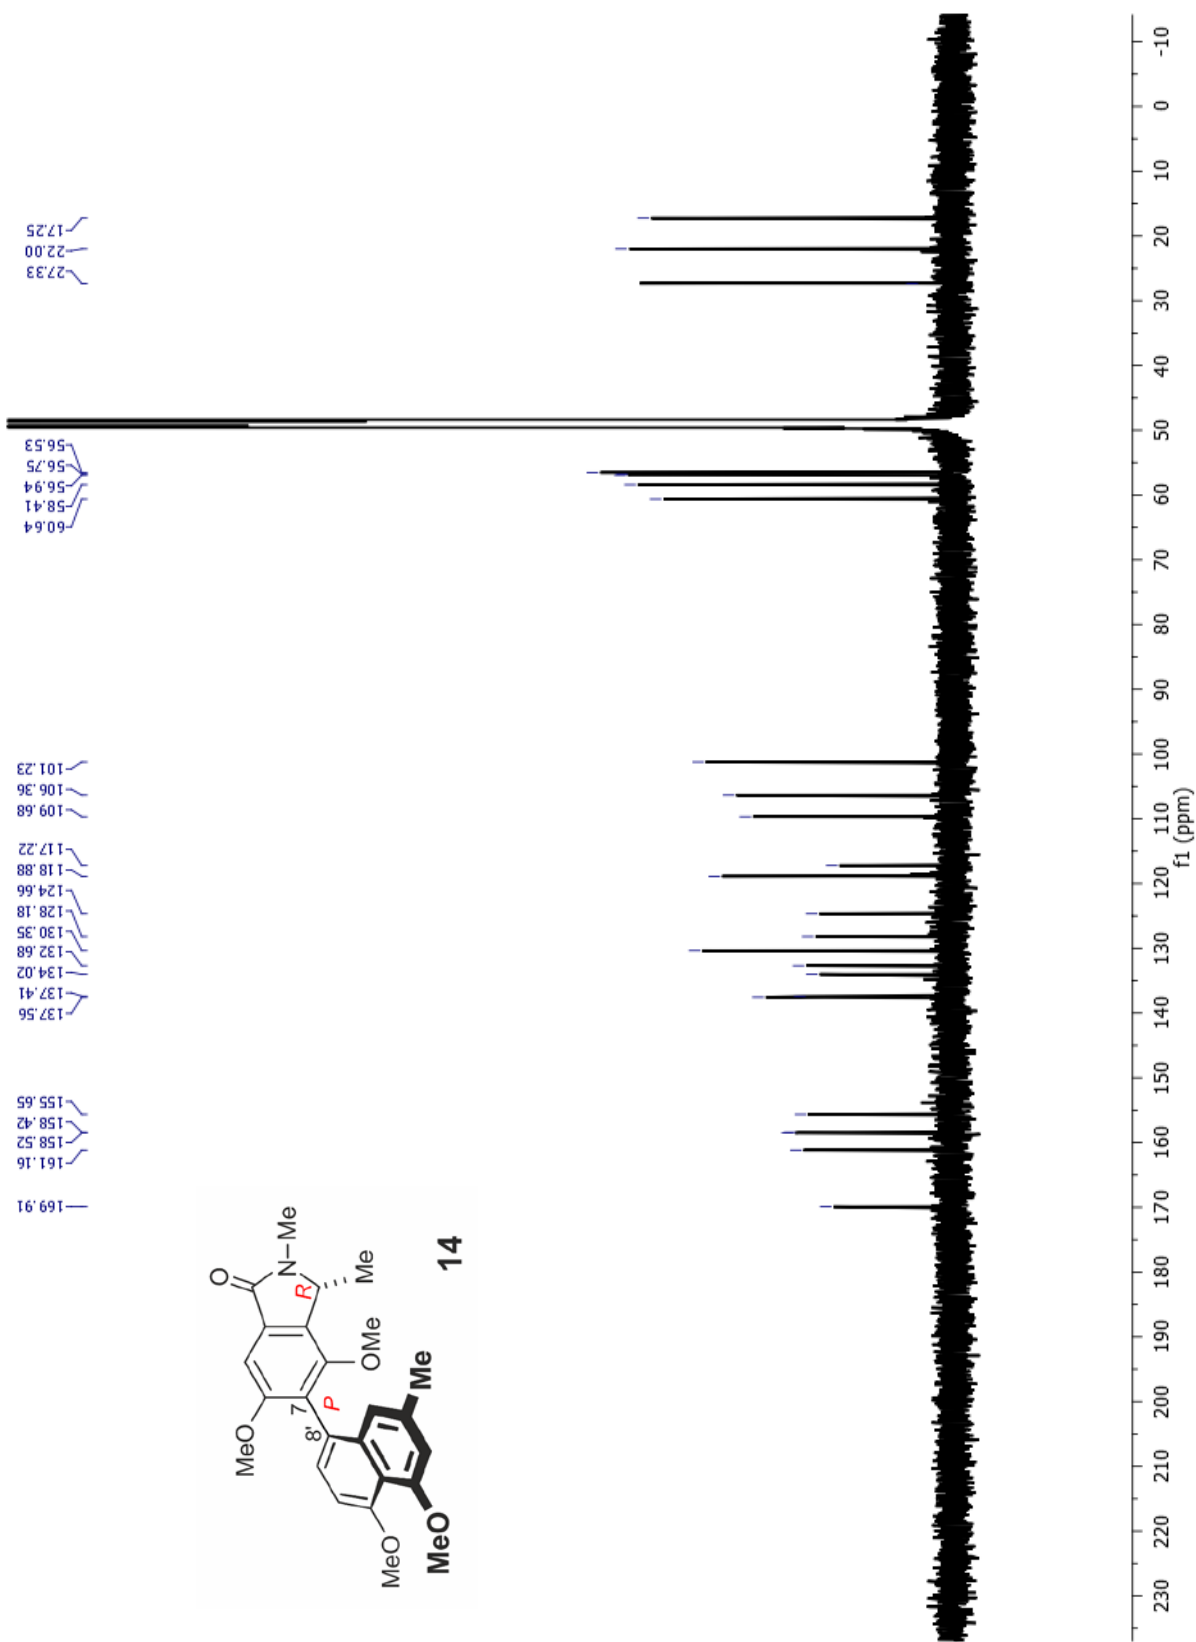

**Figure S2:** <sup>13</sup>C NMR spectrum of ancistrobrevoline A (**14**) in methanol-*d*<sub>4</sub>.

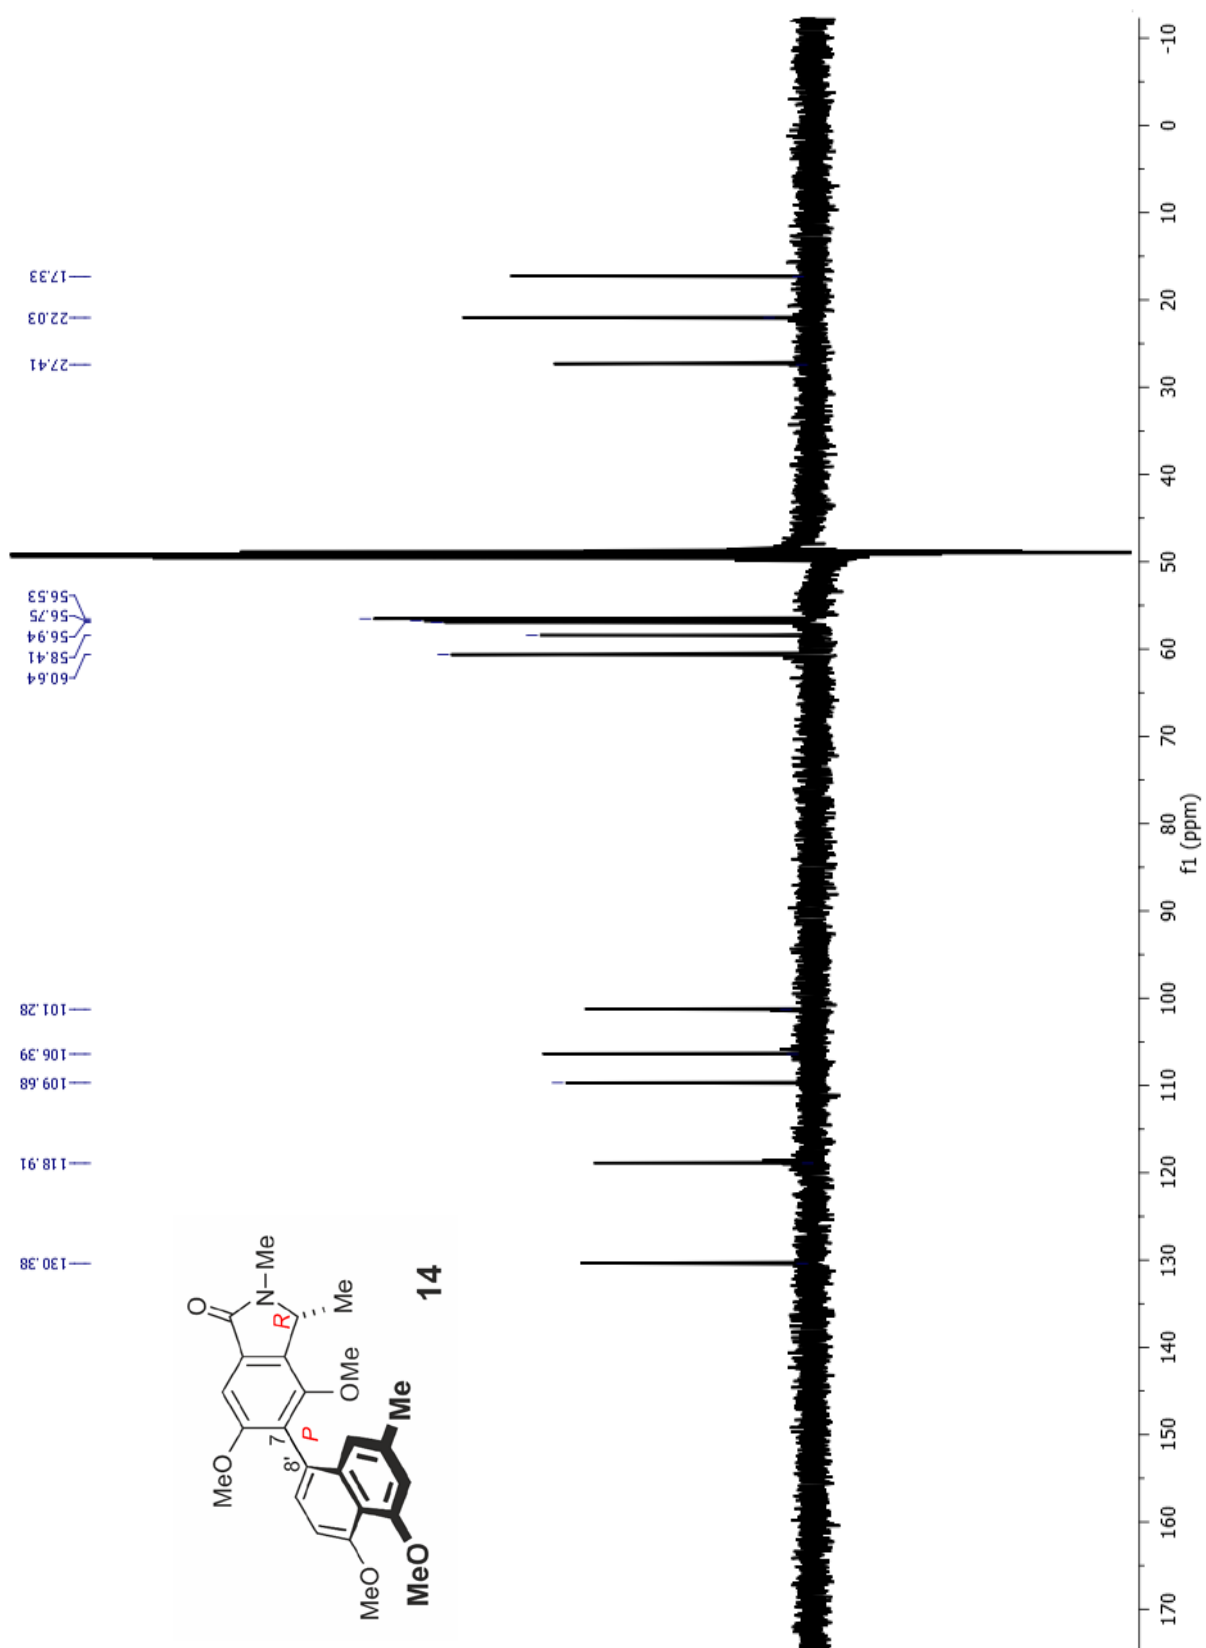

**Figure S3:**  $^{13}\text{C}$  DEPT 135 NMR spectrum ancistrobrevoline A (**14**) in methanol- $d_4$ .



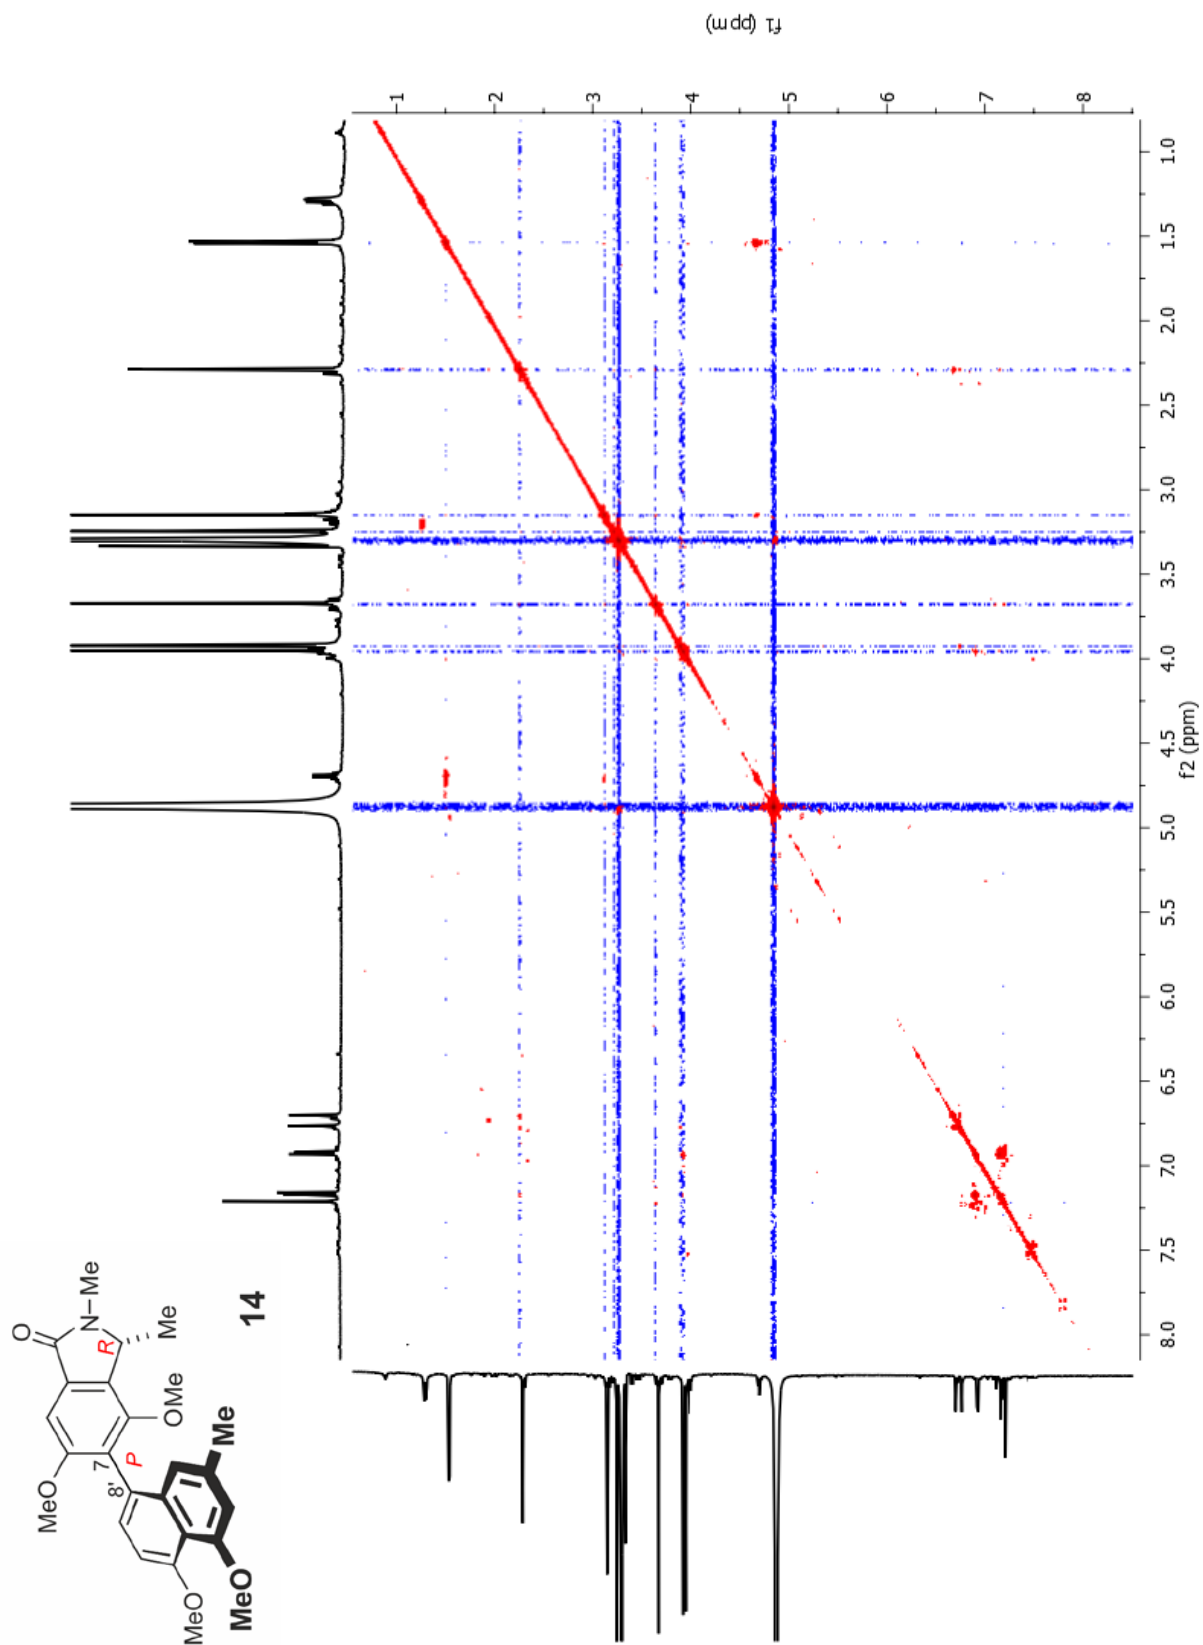

**Figure S4:**  $^1\text{H}$ - $^1\text{H}$  COSY spectrum of ancistrobrevoline A (**14**) in methanol- $d_4$ .

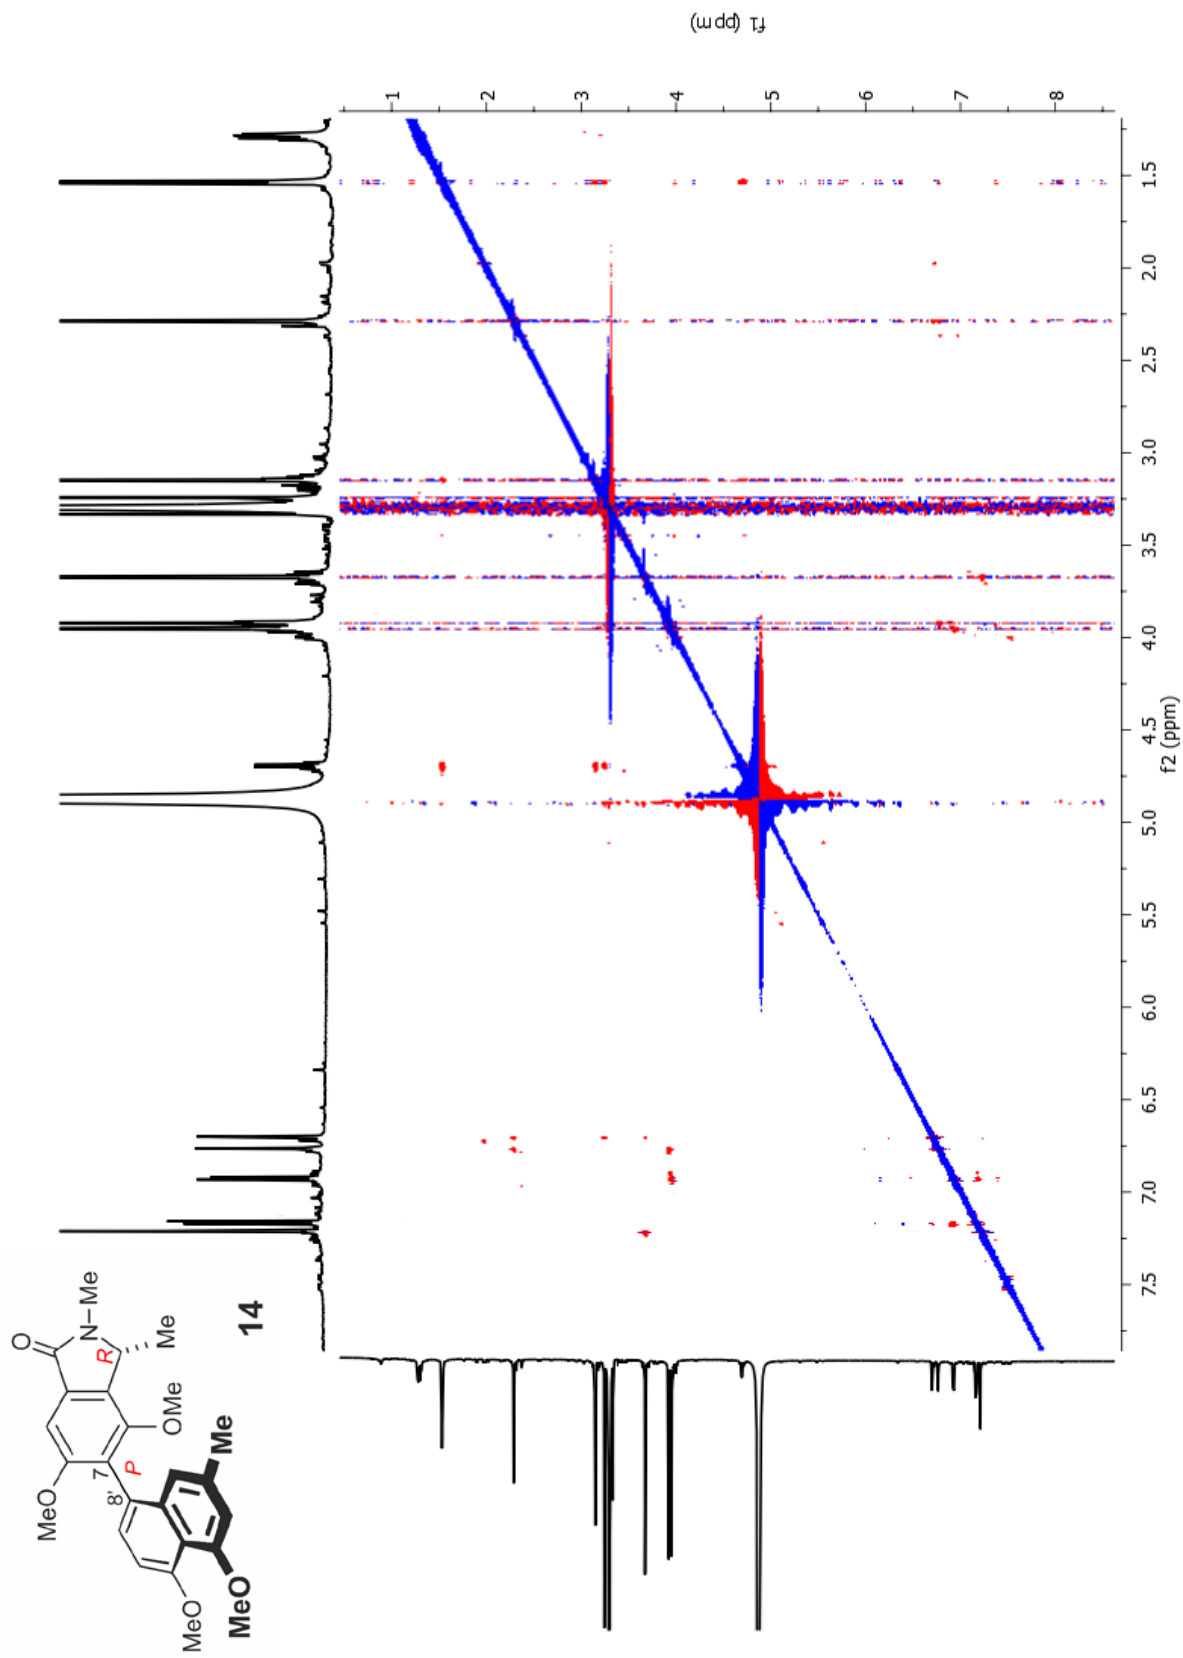

**Figure S5:**  $^1\text{H}$ - $^1\text{H}$  NOESY spectrum of ancistrobrevoline A (**14**) in methanol- $d_4$ .

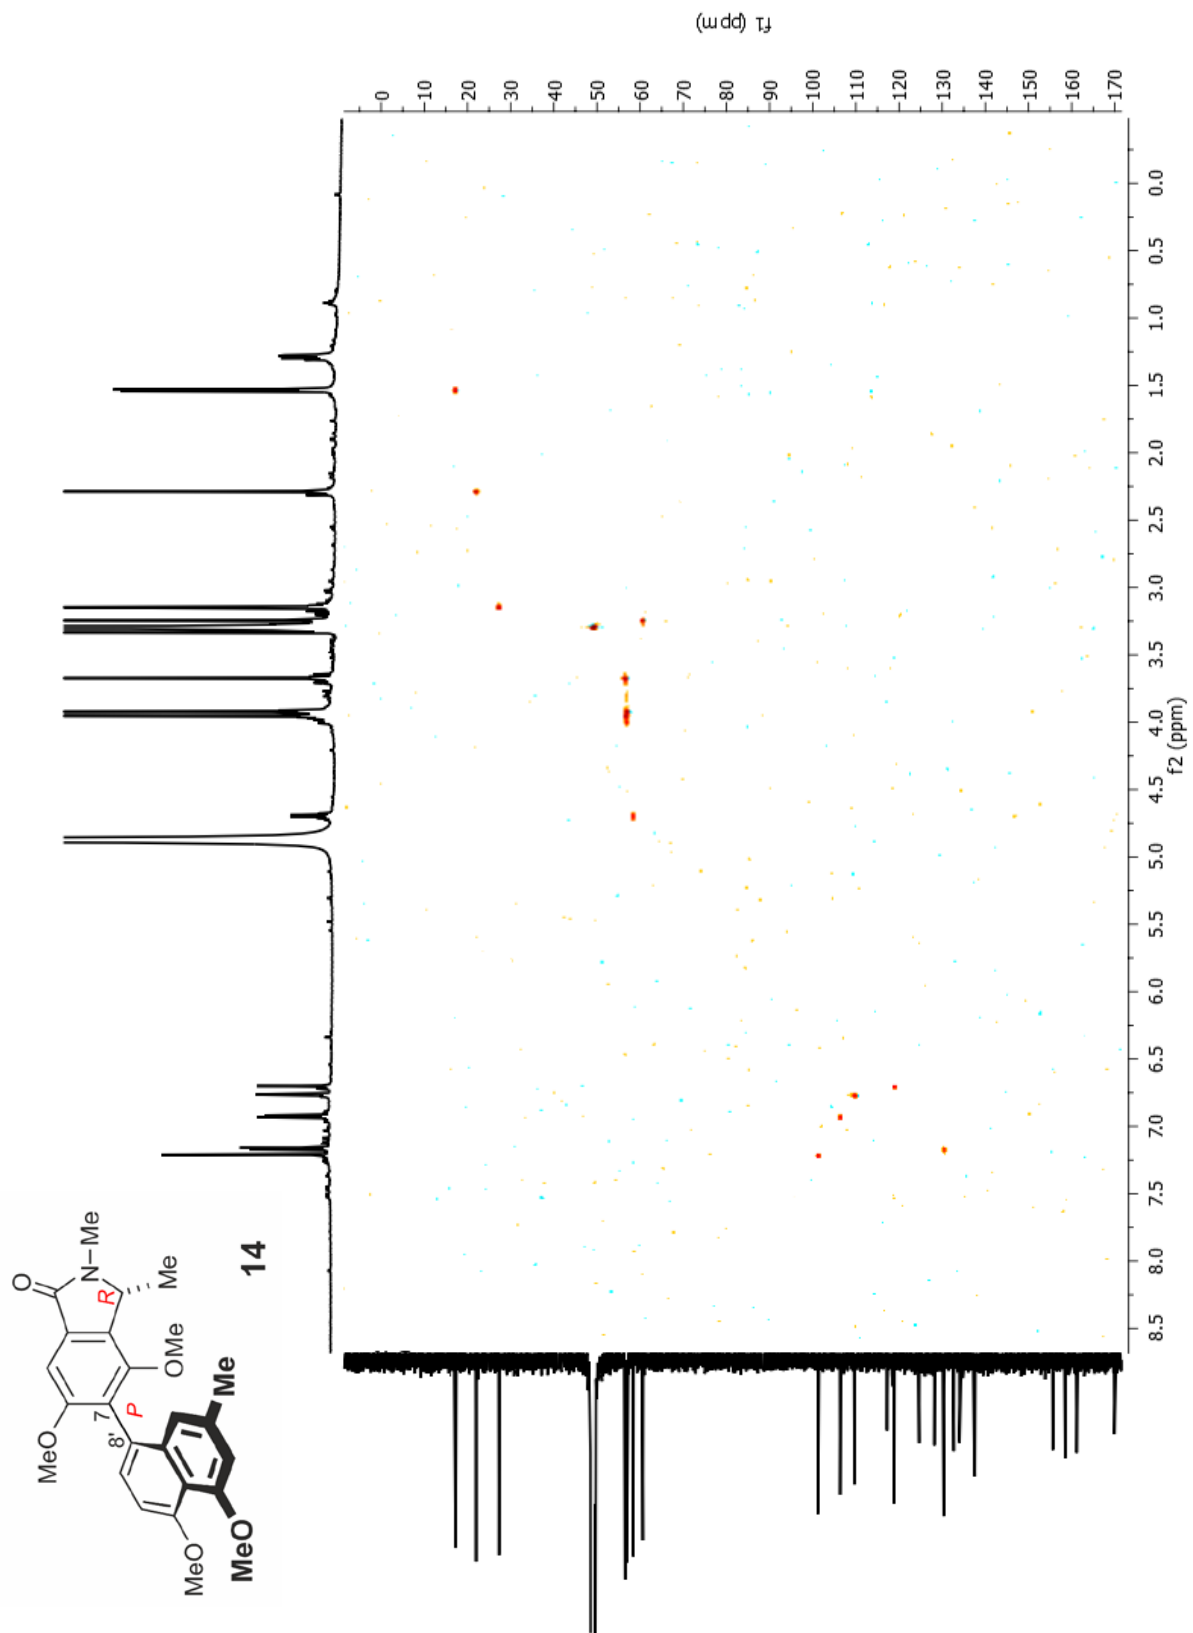

**Figure S6:**  $^1\text{H}$ - $^{13}\text{C}$  HSQC spectrum of ancistrobrevoline (**14**) in methanol- $d_4$ .

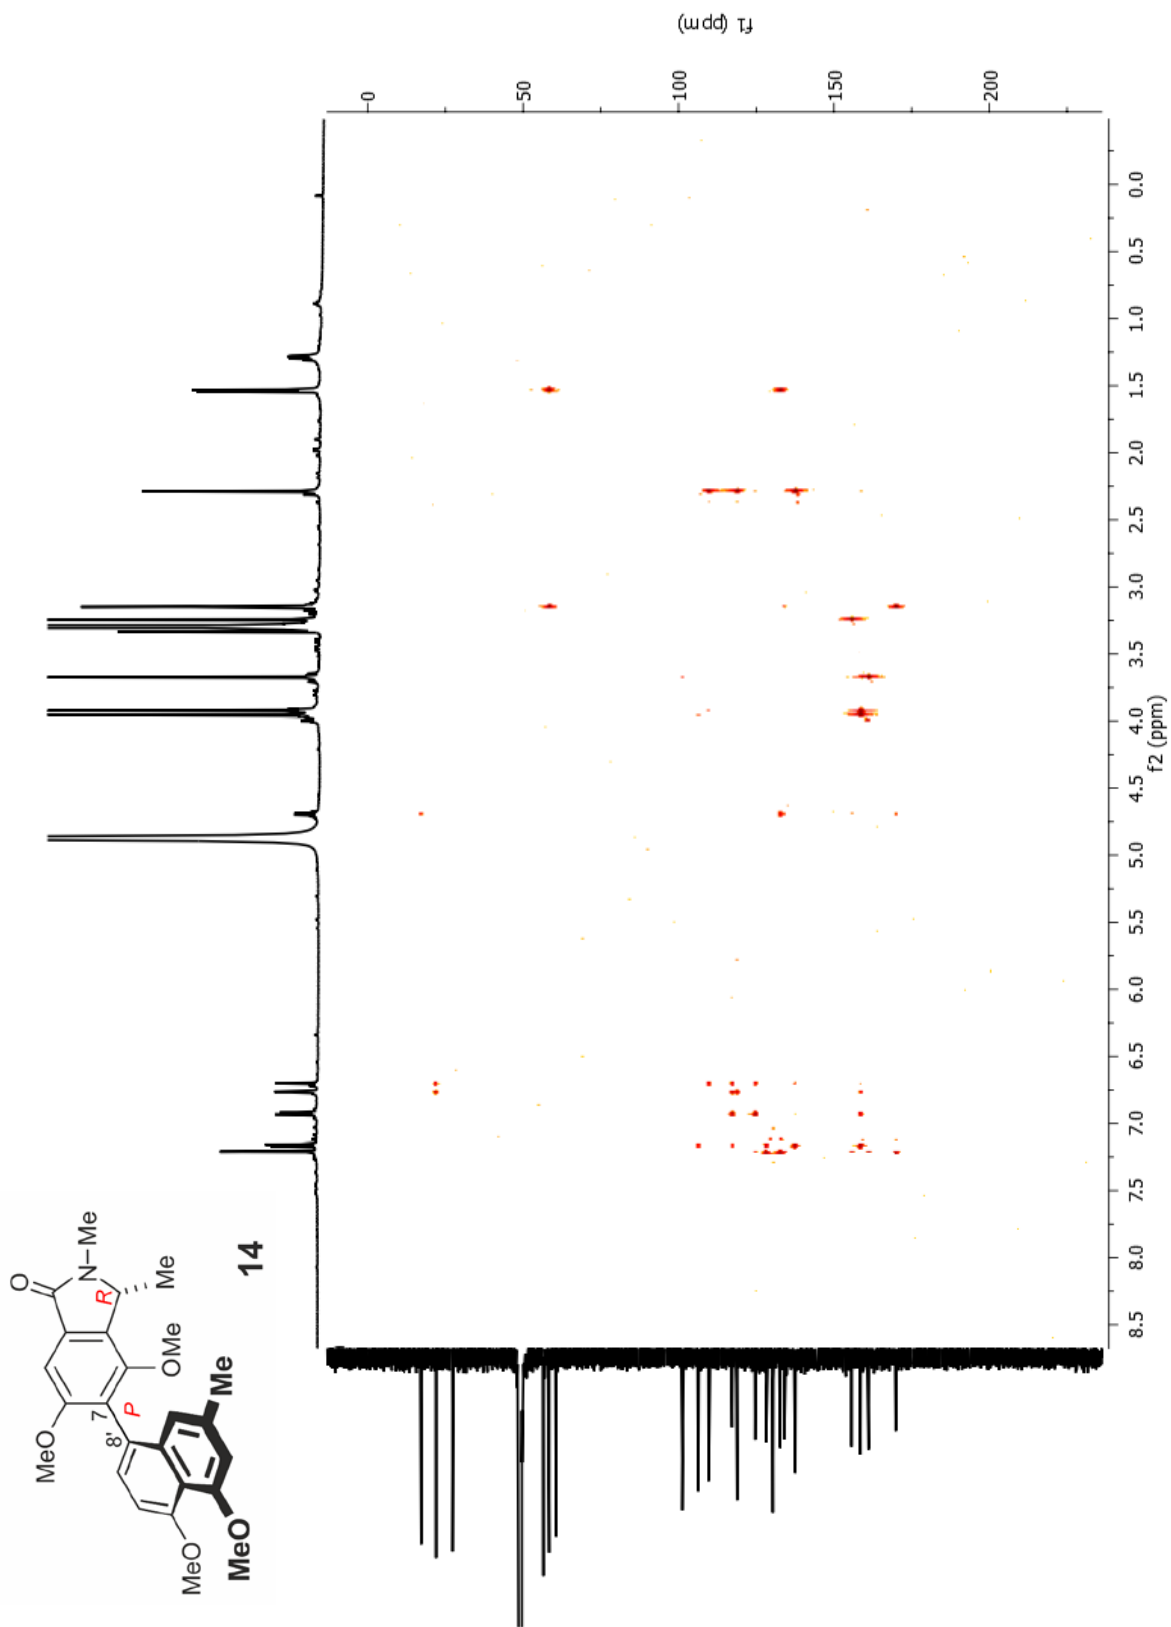

**Figure S7:**  $^1\text{H}$ - $^{13}\text{C}$  HMBC spectrum of ancistrobrevoline (14) in methanol- $d_4$ .

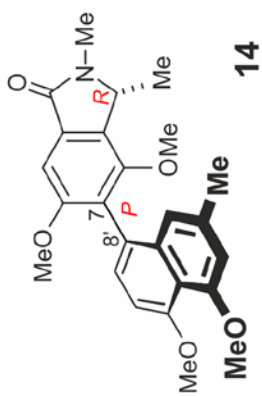

| Acquisition Parameter |            |
|-----------------------|------------|
| Source Type           | ESI        |
| Focus                 | Not active |
| Scan Begin            | 50 m/z     |
| Scan End              | 2500 m/z   |
| Ion Polarity          | Positive   |
| Set Funnel 1 RF       | 100.0 Vpp  |
| Set Funnel 2 RF       | 200.0 Vpp  |
| Set Hexapole RF       | 200.0 Vpp  |
| Set Nebulizer         | 0.3 Bar    |
| Set Dry Heater        | 200 °C     |
| Set Dry Gas           | 4.0 l/min  |
| Set Divert Valve      | Source     |

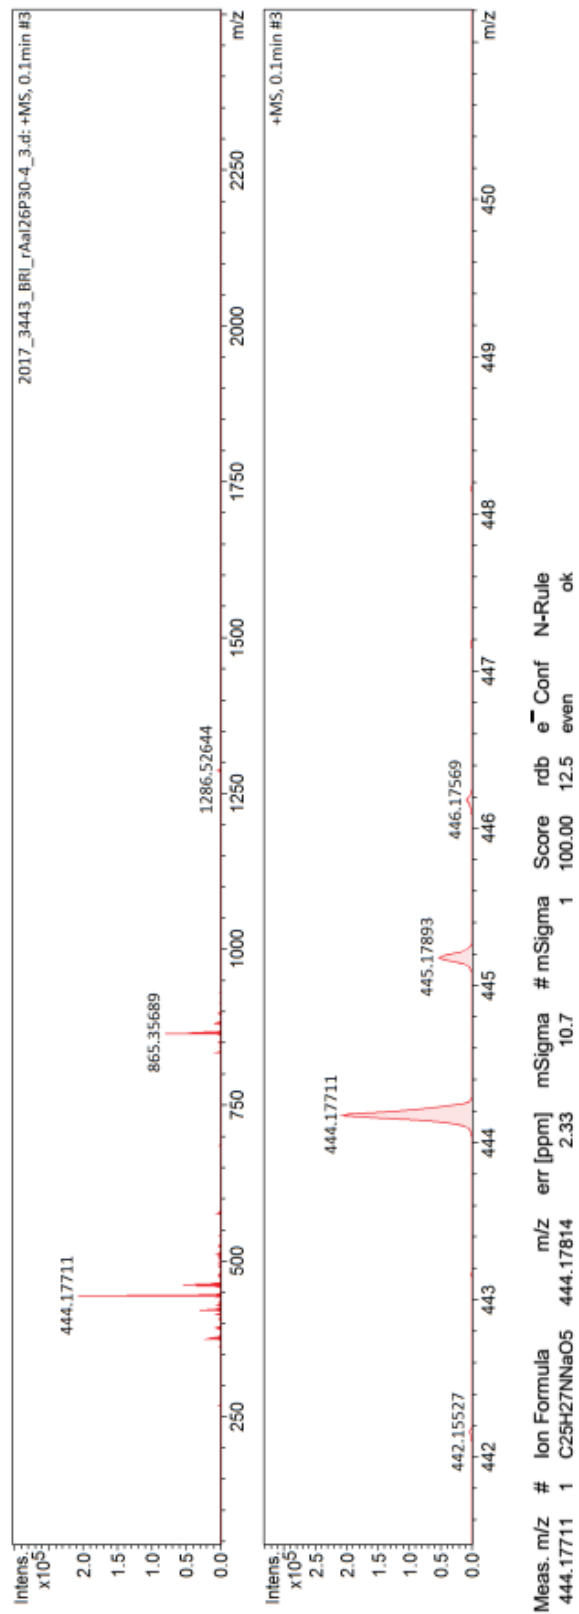

**Figure S8:** HR-ESI-MS spectrum of ancistrobrevoline A (**14**).

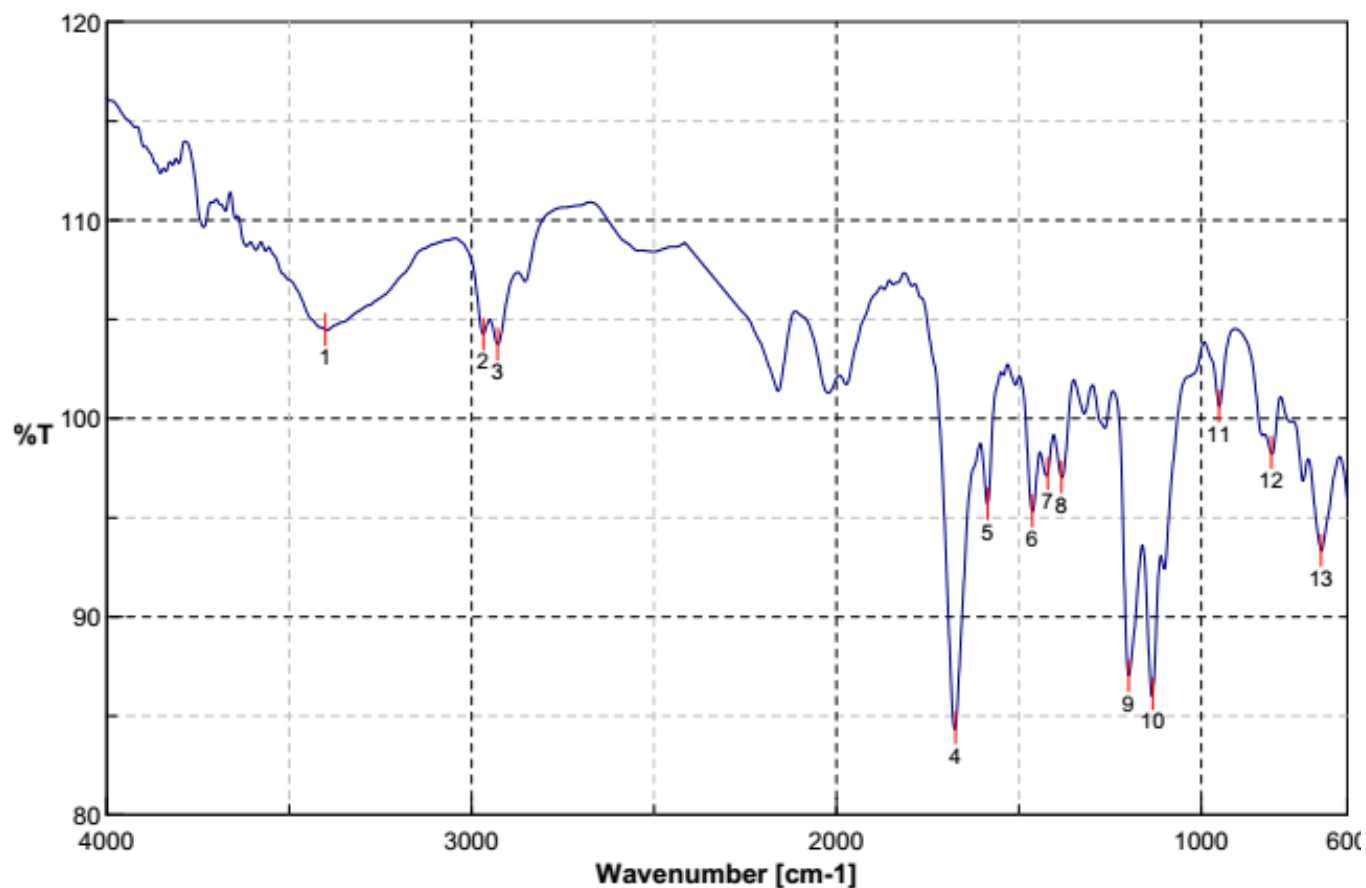

Accumulation 8  
 Resolution 4 cm<sup>-1</sup>  
 Zero Filling ON  
 Apodization Cosine  
 Gain Auto (4)  
 Scanning Speed Auto (2 mm/sec)  
 Date/Time 28.02.2019 10:13  
 Update 28.02.2019 11:07  
 Operator Student  
 File Name Memory#1  
 Sample Name  
 Comment

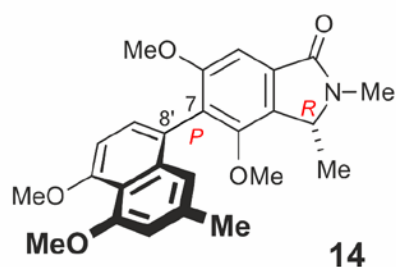

| No. | cm-1    | %T      | No. | cm-1    | %T      | No. | cm-1    | %T      |
|-----|---------|---------|-----|---------|---------|-----|---------|---------|
| 1   | 3400.85 | 104.489 | 2   | 2967.91 | 104.258 | 3   | 2929.34 | 103.756 |
| 4   | 1673.91 | 84.4025 | 5   | 1585.2  | 95.7079 | 6   | 1463.71 | 95.3412 |
| 7   | 1421.28 | 97.2293 | 8   | 1383.68 | 97.0615 | 9   | 1198.54 | 87.0345 |
| 10  | 1132.97 | 86.1198 | 11  | 951.698 | 100.63  | 12  | 808.992 | 98.2803 |
| 13  | 672.071 | 93.3576 |     |         |         |     |         |         |

Figure S9: IR spectrum of ancistrobrevoline A (14).

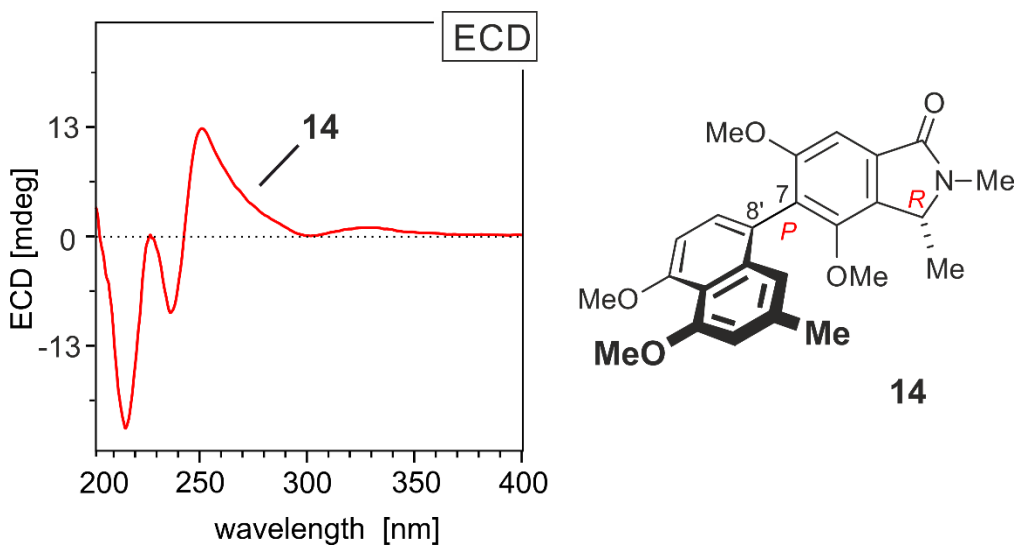

**Figure S10a:** ECD spectrum of ancistrobrevoline A (**14**).

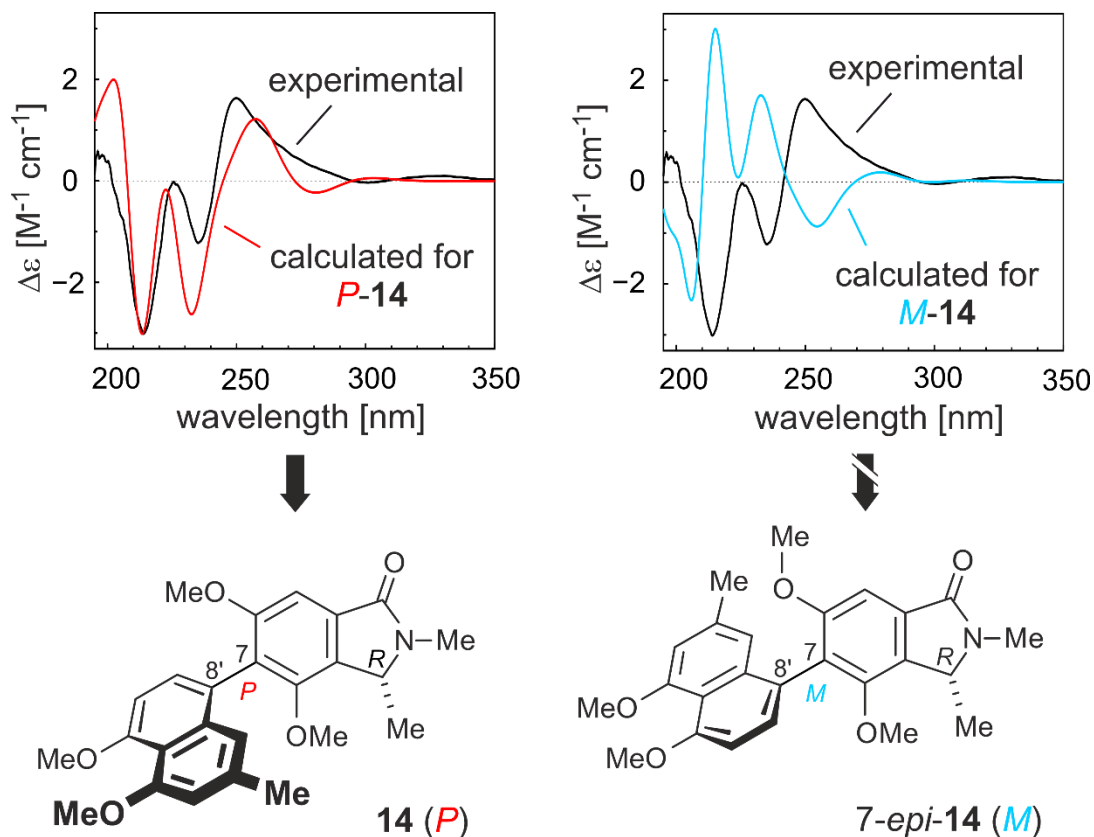

**Figure S10b:** Assignment of the absolute axial configuration of ancistrobrevoline A (**14**), by comparison of its experimental ECD spectrum with the spectra calculated for *P*-**14** and *M*-**14** by using TD $\omega$ B97XD3/def2-TZVP//B3LYP-D3/def2-TZVP.

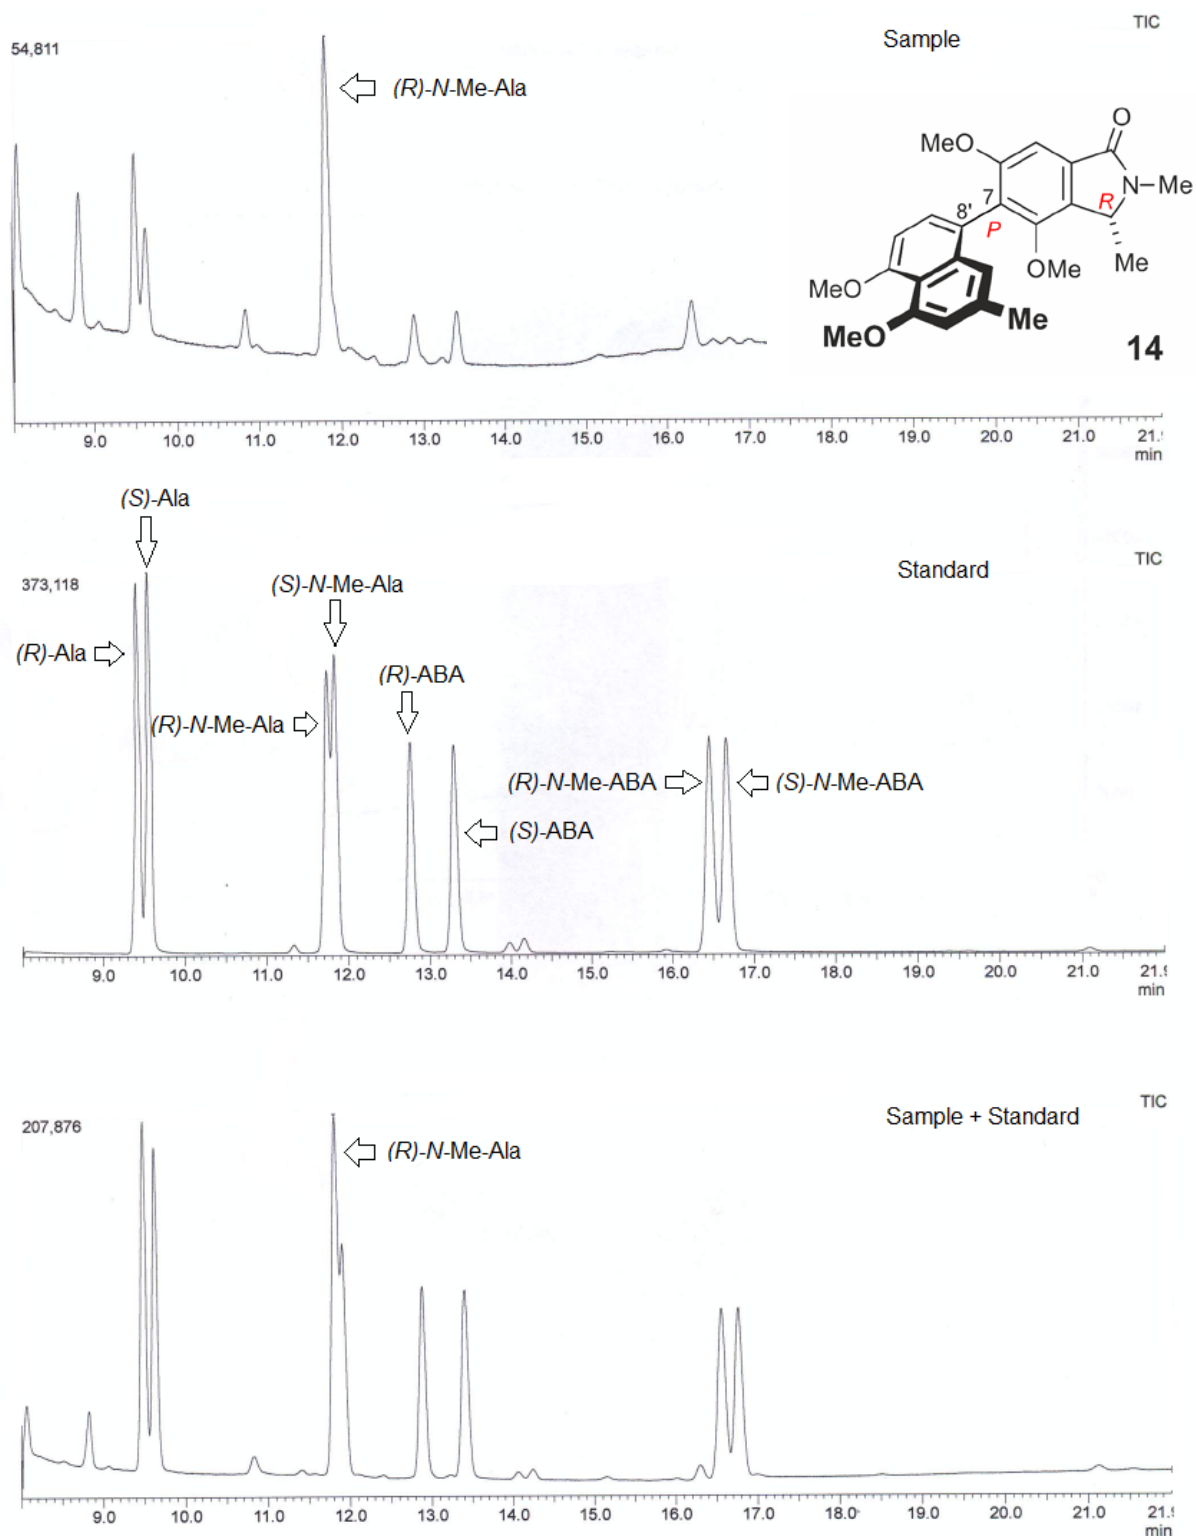

Ala = Alanine

*N*-Me-Ala = *N*-Methylalanine

ABA = 3-Aminobutyric acid

*N*-Me-ABA = *N*-Methyl-3-aminobutyric acid

**Figure S11:** Oxidative degradation of ancistrobrevoline A (14).



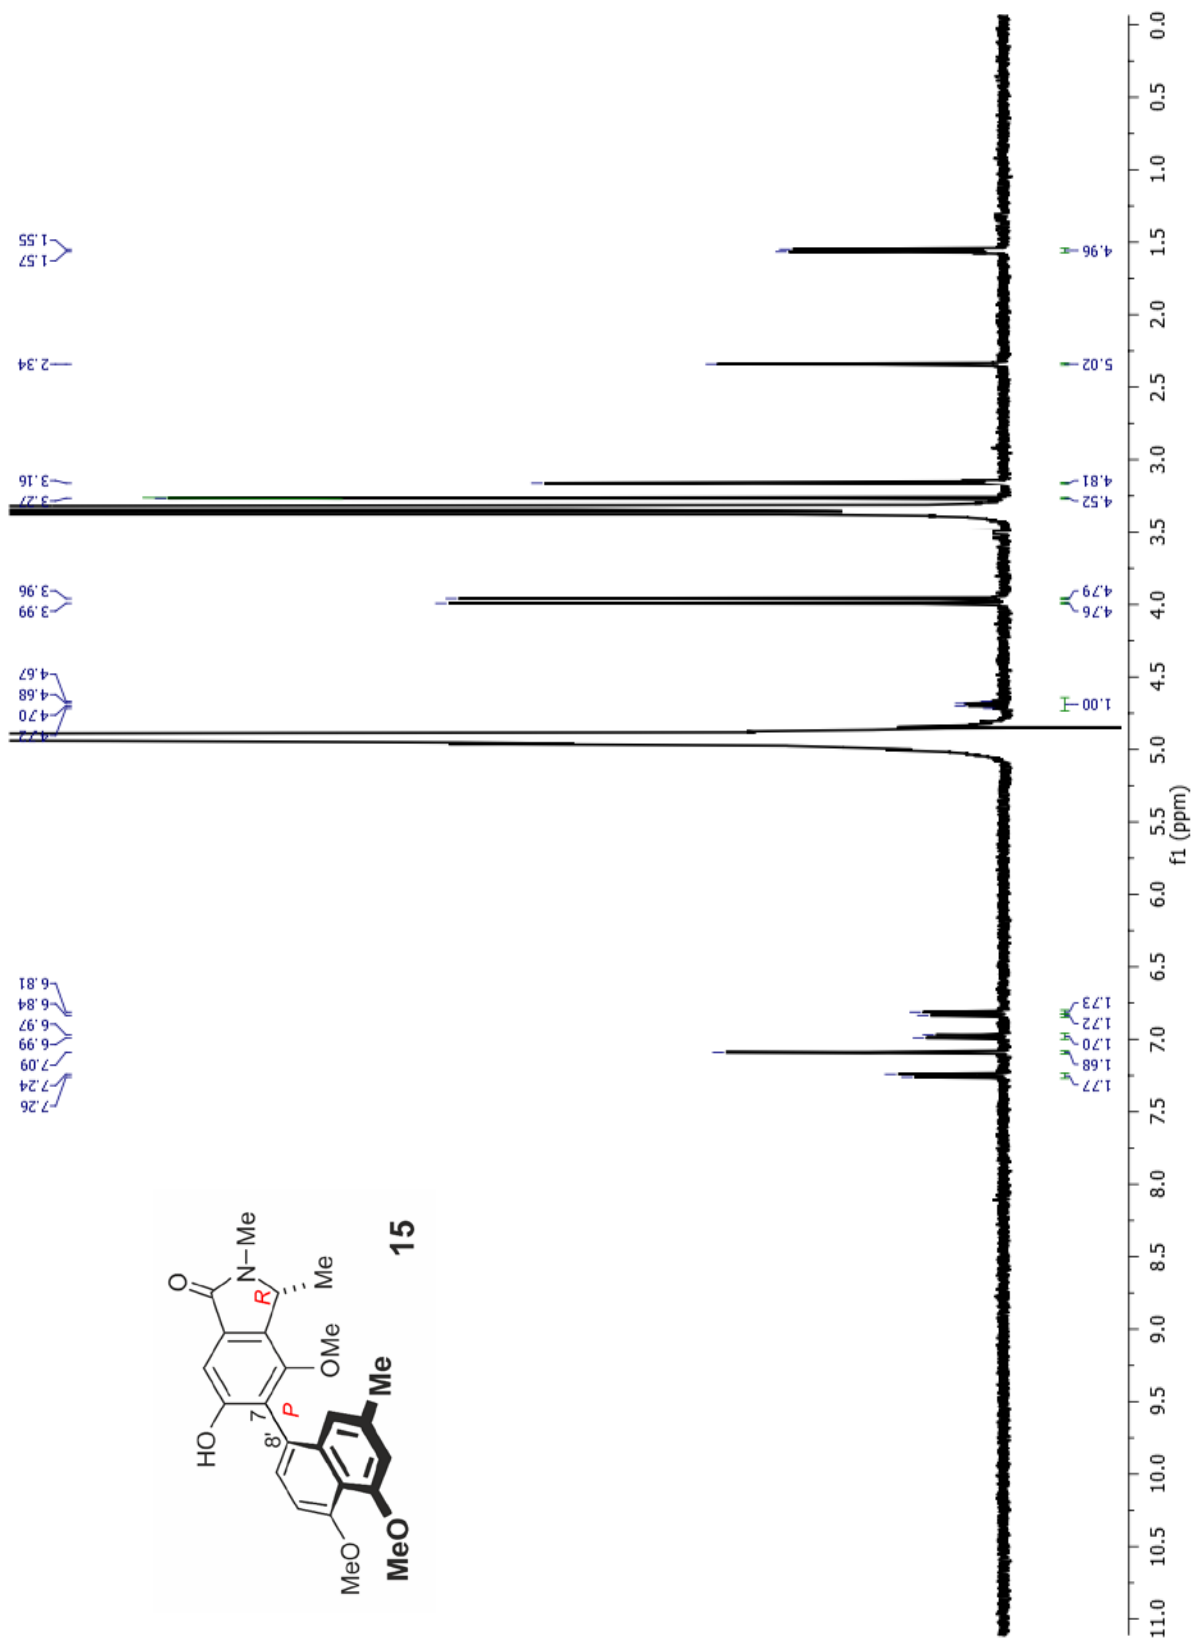

**Figure S12:** <sup>1</sup>H NMR spectrum of ancistrobrevoline B (**15**) in methanol-d<sub>4</sub>.

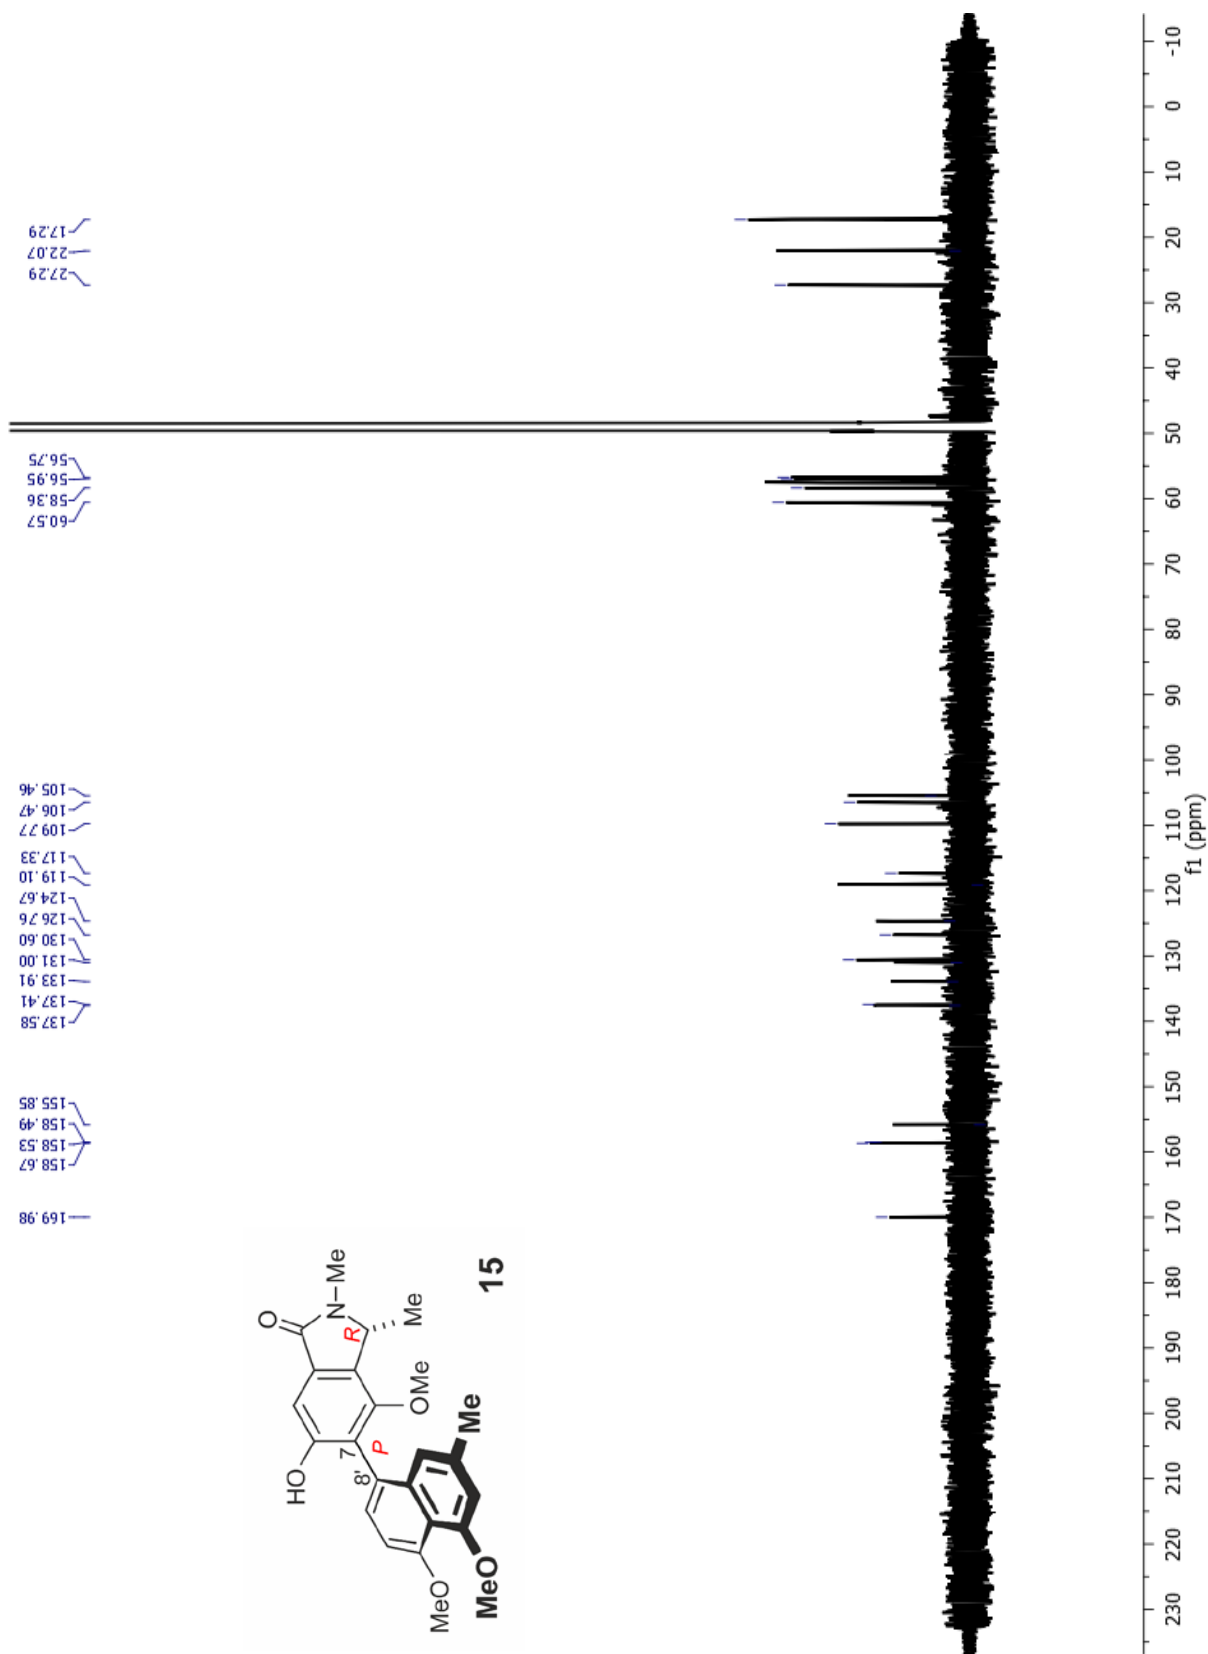

**Figure S13:**  $^{13}\text{C}$  NMR spectrum of ancistrobrevoline B (**15**) in methanol- $d_4$ .

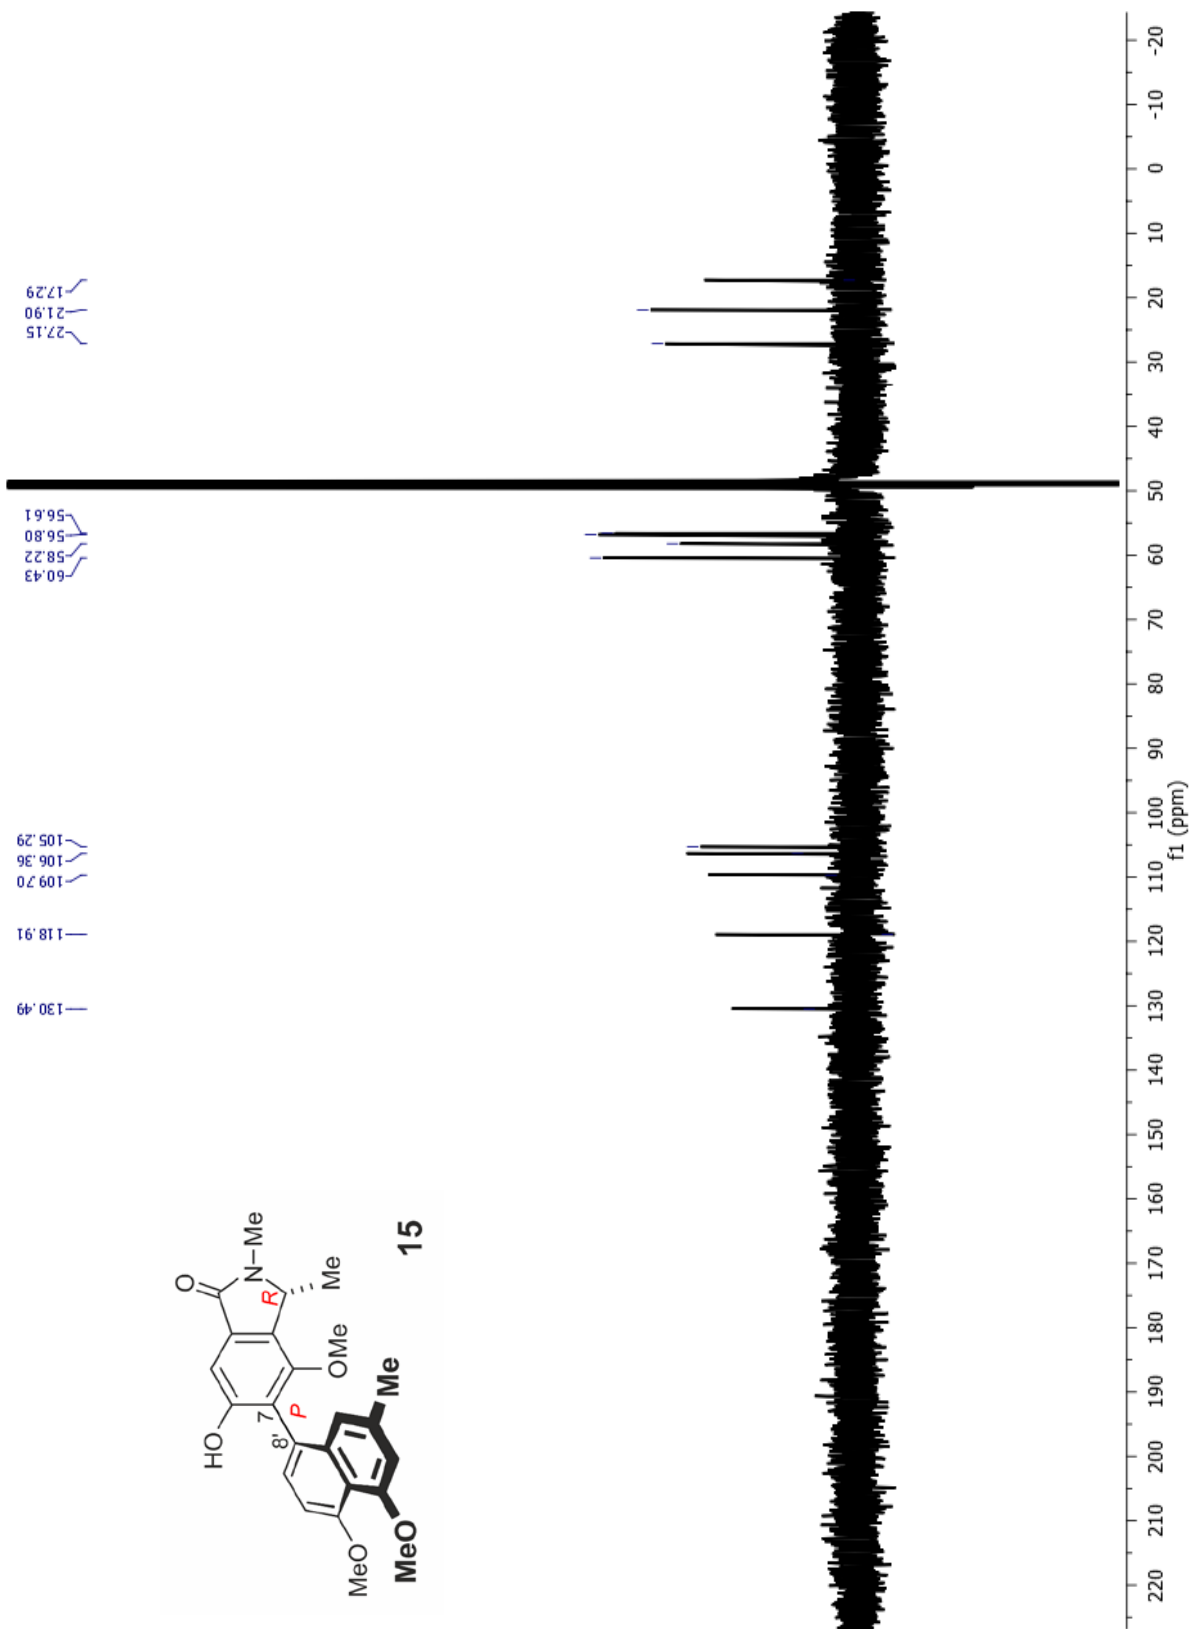

**Figure S14:** <sup>13</sup>C DEPT 135 NMR spectrum ancistrobrevoline B (**15**) in methanol-*d*<sub>4</sub>.



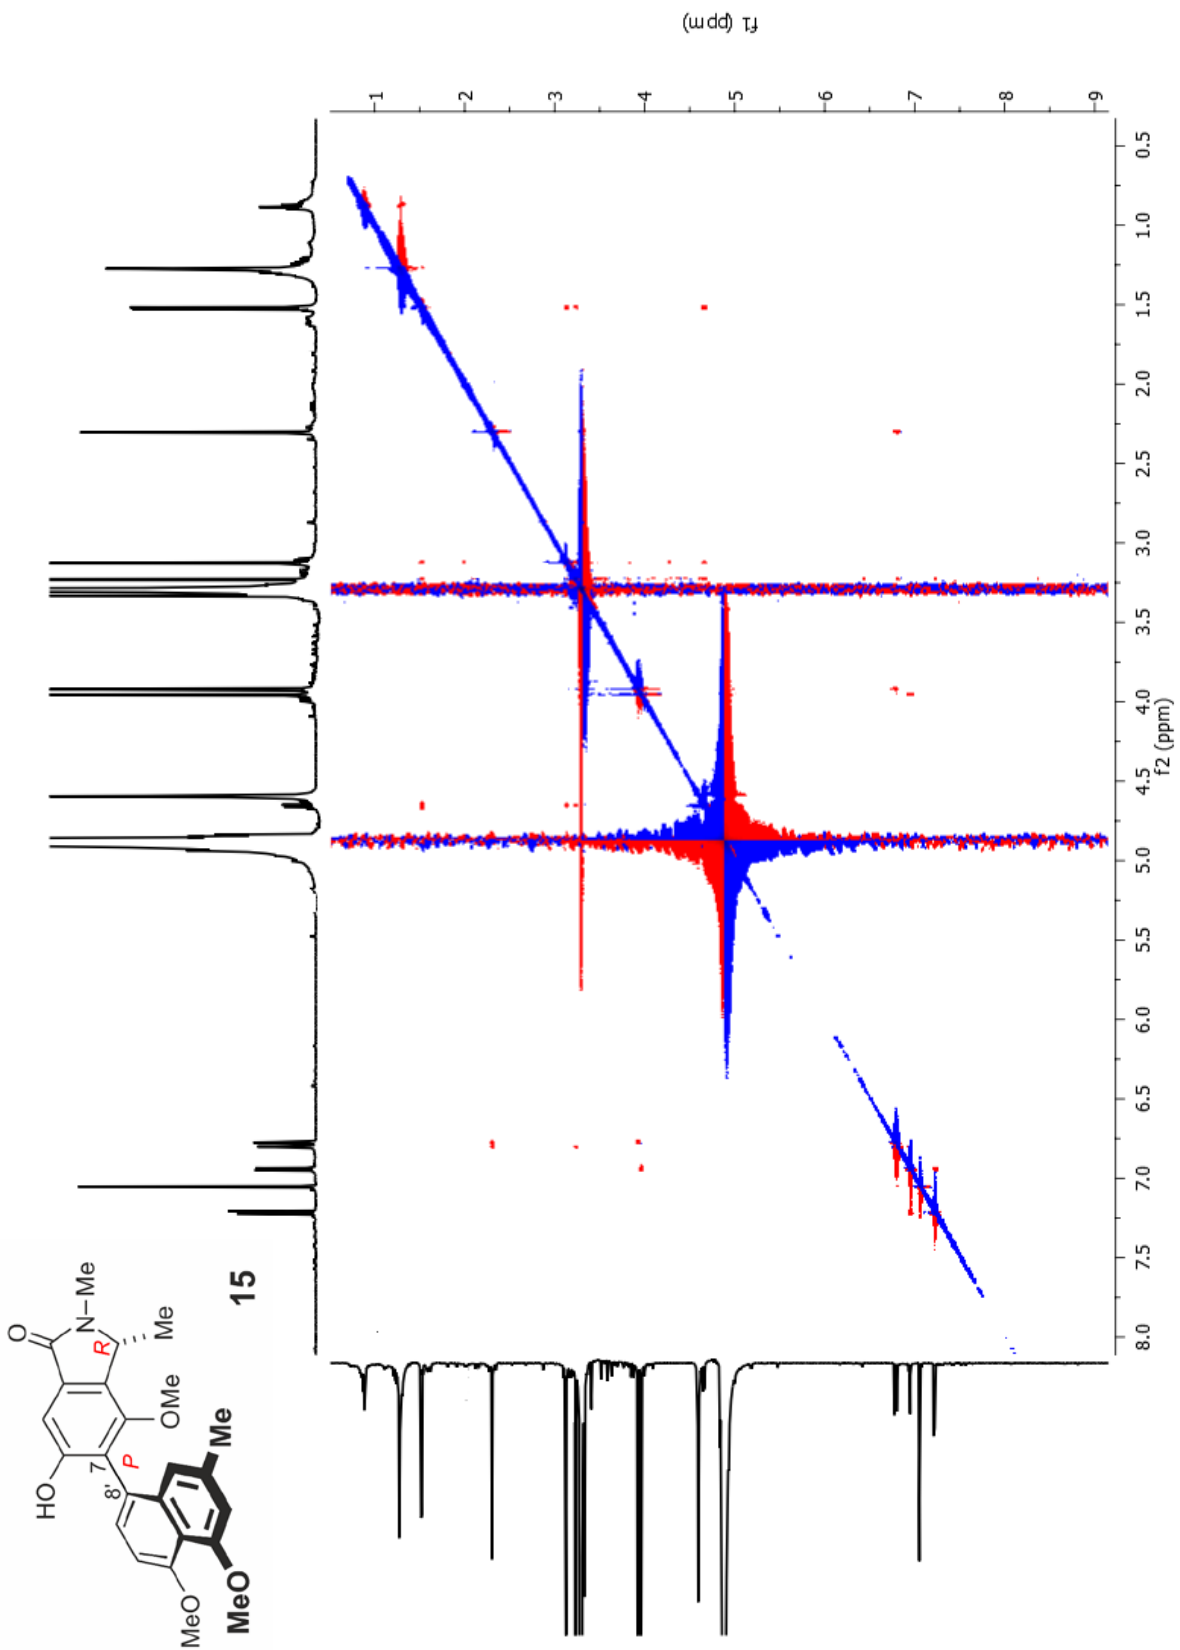

**Figure S16:**  $^1\text{H}$ - $^1\text{H}$  NOESY spectrum of ancistrobrevoline B (**15**) in methanol- $d_4$ .

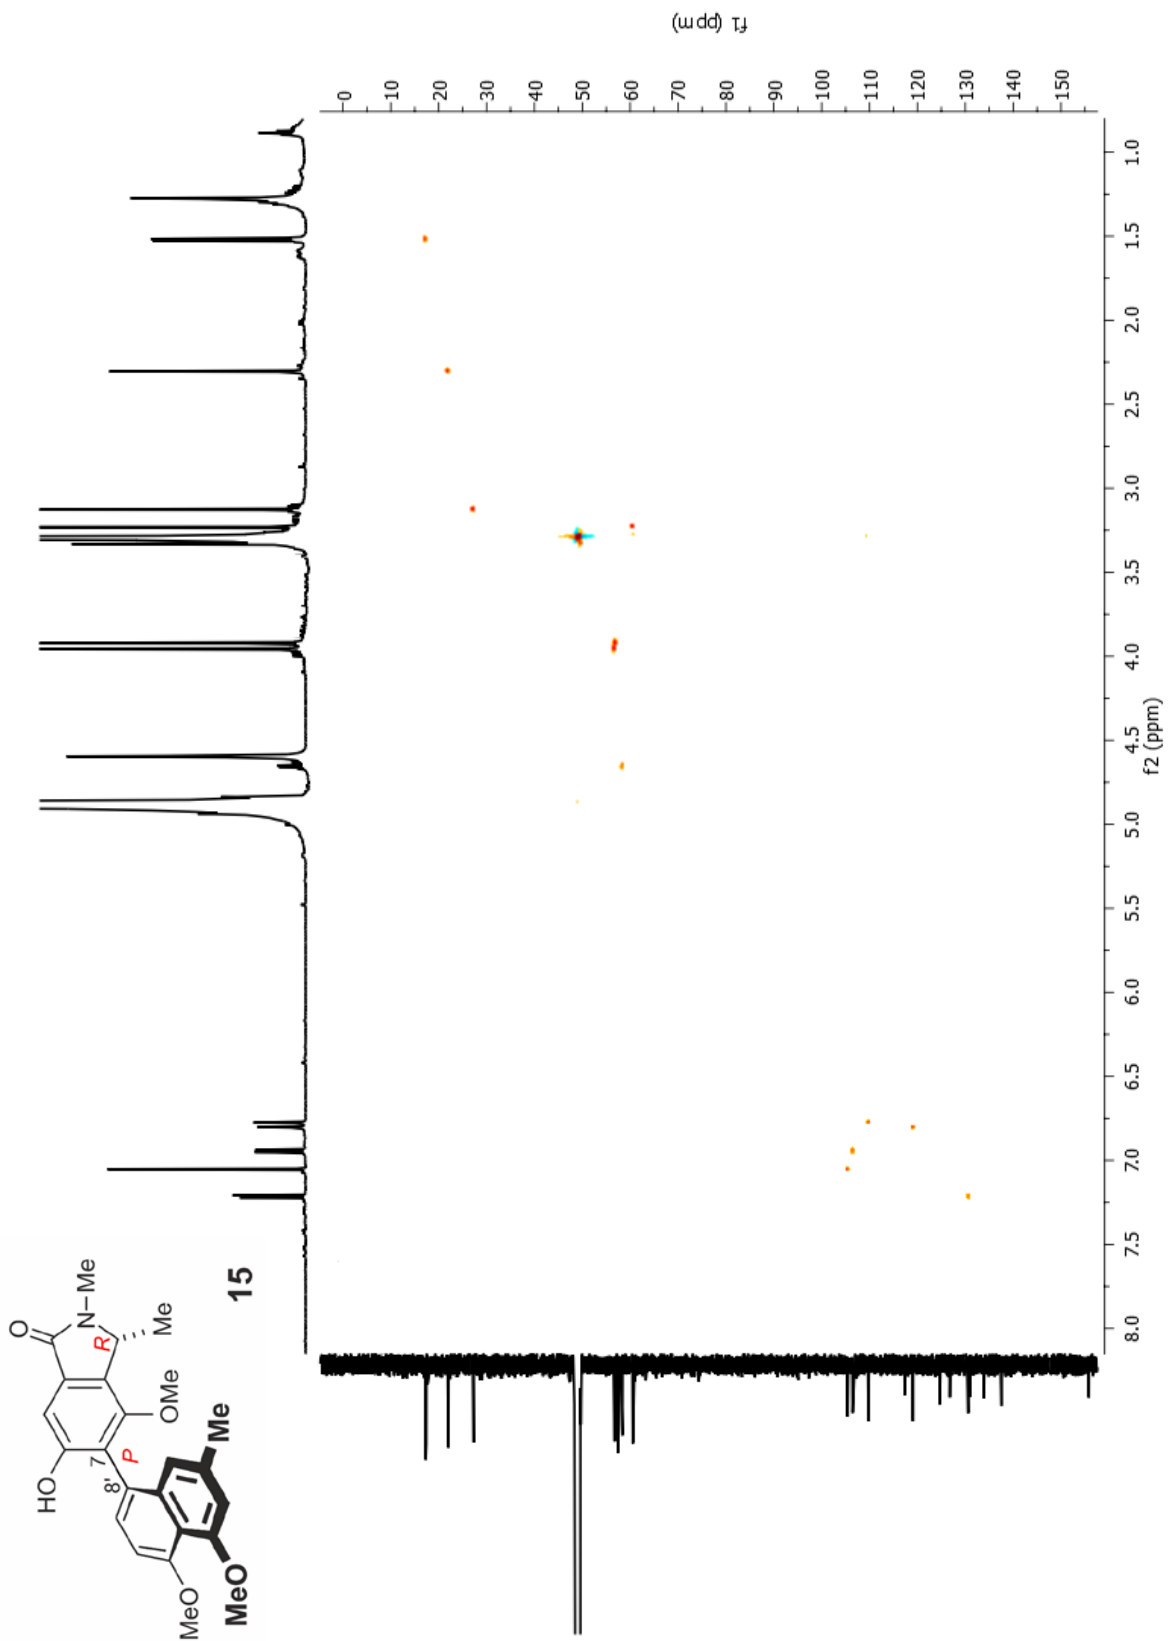

**Figure S17:**  $^1\text{H}$ - $^{13}\text{C}$  HSQC spectrum of ancistrobrevoline B (**15**) in methanol- $d_4$ .

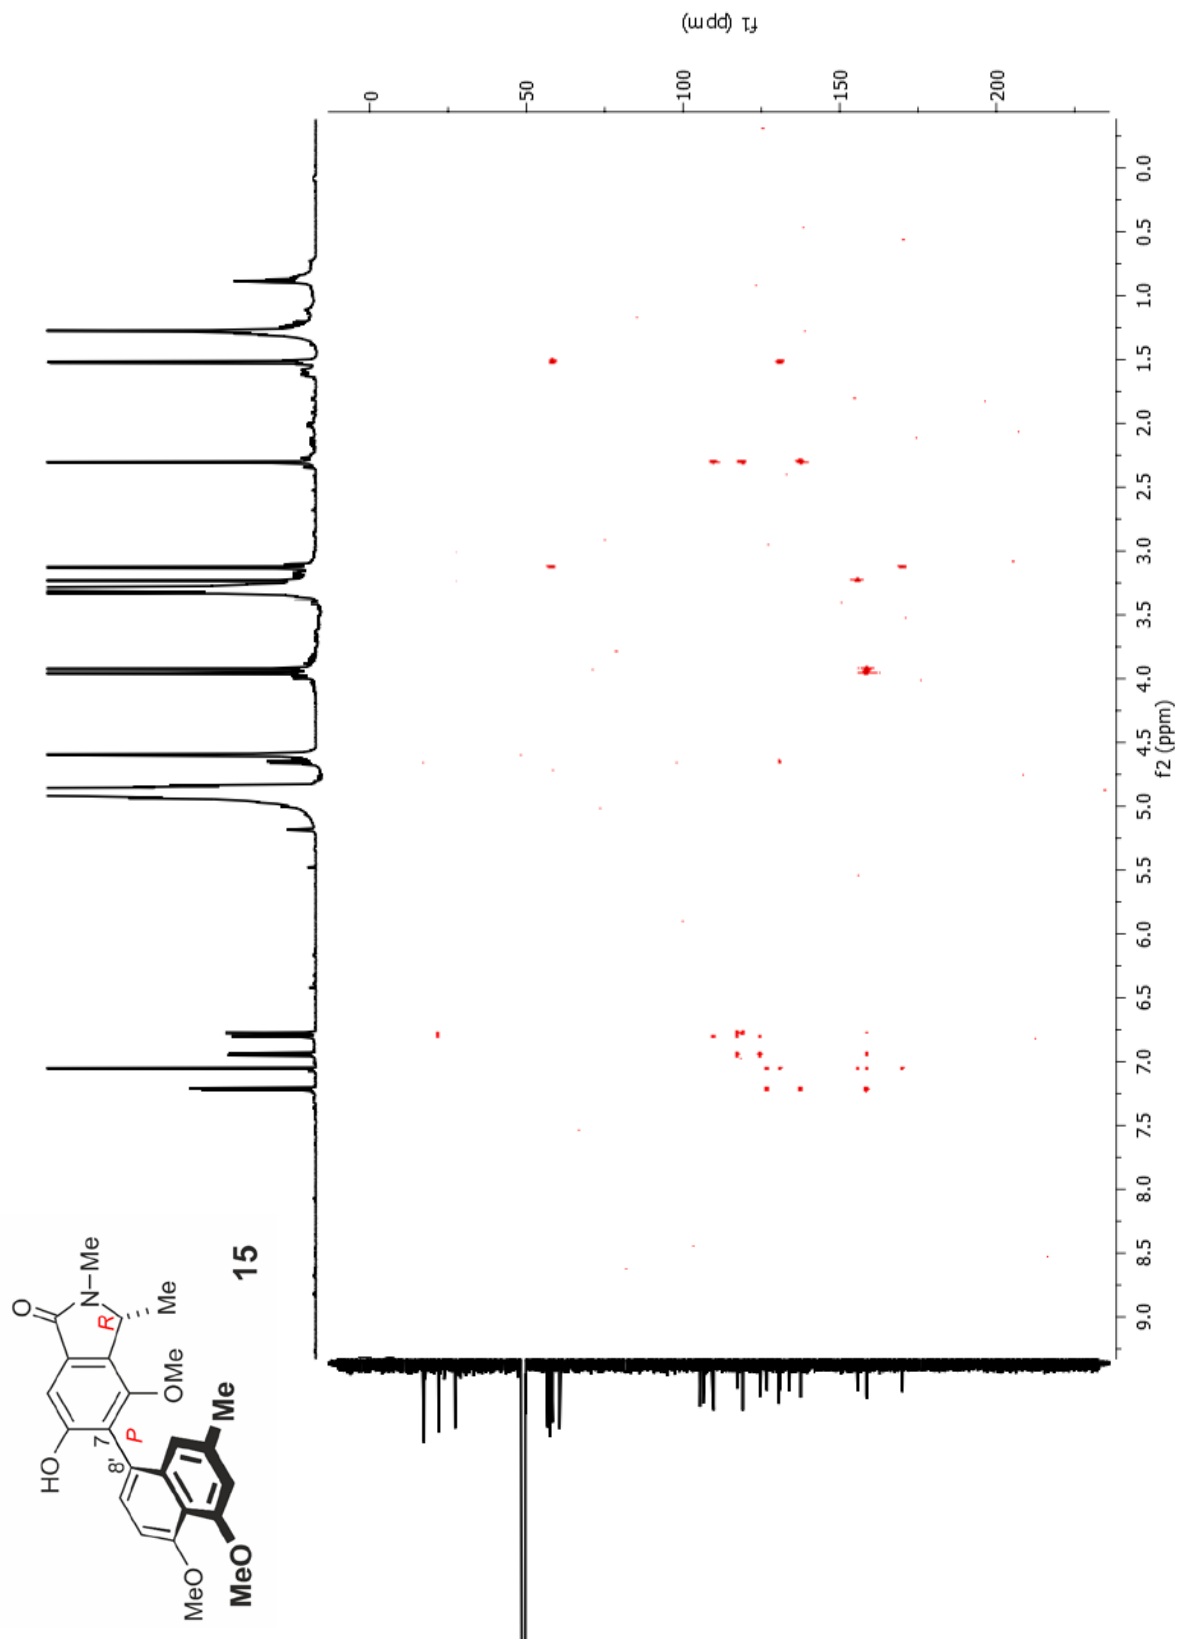

**Figure S18:**  $^1\text{H}$ - $^{13}\text{C}$  HMBC spectrum of ancistrobrevoline B (**15**) in methanol- $d_4$ .

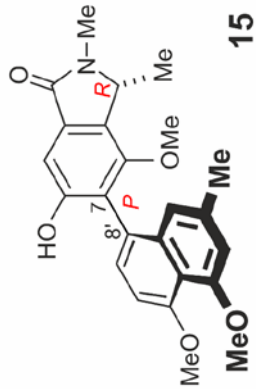

| Acquisition Parameter |            |
|-----------------------|------------|
| Source Type           | ESI        |
| Focus                 | Not active |
| Scan Begin            | 50 m/z     |
| Scan End              | 2500 m/z   |
| Ion Polarity          | Positive   |
| Set Funnel 1 RF       | 100.0 Vpp  |
| Set Funnel 2 RF       | 200.0 Vpp  |
| Set Hexapole RF       | 200.0 Vpp  |
| Set Nebulizer         | 0.3 Bar    |
| Set Dry Heater        | 200 °C     |
| Set Dry Gas           | 4.0 l/min  |
| Set Divert Valve      | Source     |

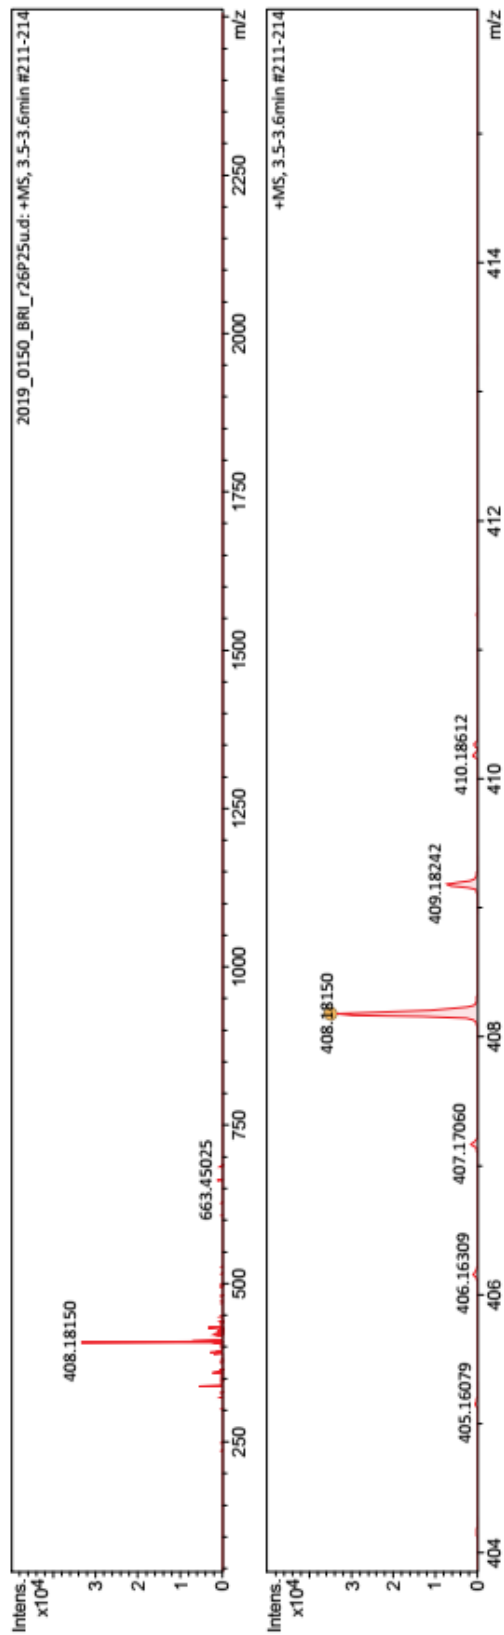

**Figure S19:** HR-ESI-MS spectrum of ancistrobrevoline B (**15**).



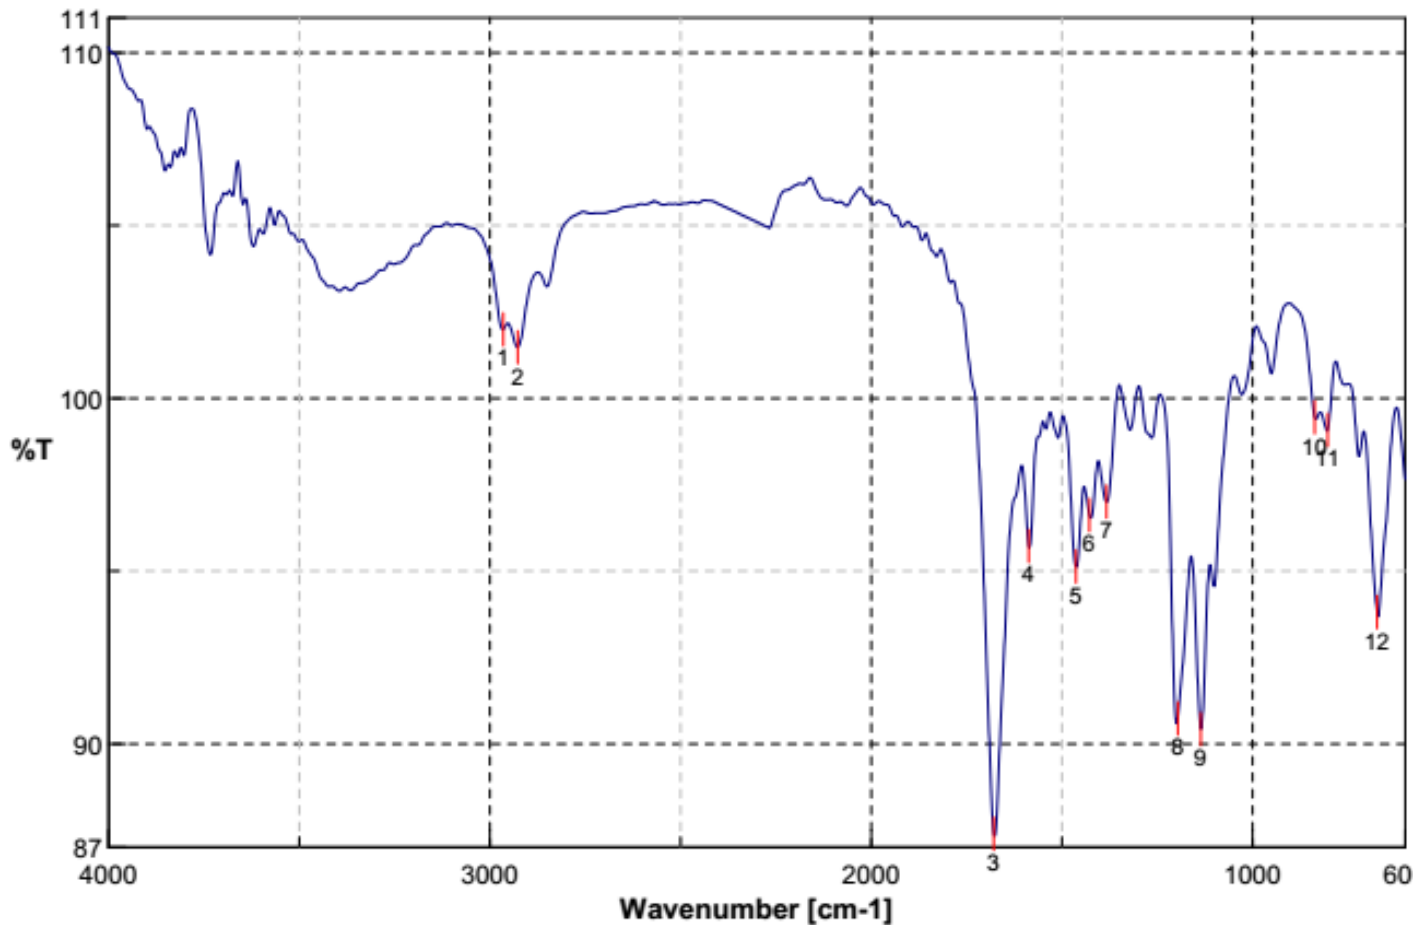

Accumulation 8  
 Resolution 4 cm-1  
 Zero Filling ON  
 Apodization Cosine  
 Gain Auto (4)  
 Scanning Speed Auto (2 mm/sec)  
 Date/Time 28.02.2019 10:12  
 Update 28.02.2019 11:03  
 Operator Student  
 File Name Memory#1  
 Sample Name  
 Comment

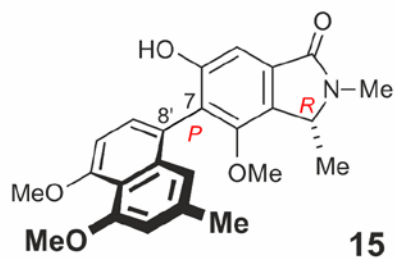

| No. | cm-1    | %T      | No. | cm-1    | %T      | No. | cm-1    | %T      |
|-----|---------|---------|-----|---------|---------|-----|---------|---------|
| 1   | 2965.02 | 101.992 | 2   | 2927.41 | 101.48  | 3   | 1678.73 | 87.3932 |
| 4   | 1587.13 | 95.7282 | 5   | 1463.71 | 95.13   | 6   | 1428.03 | 96.6252 |
| 7   | 1383.68 | 97.0048 | 8   | 1196.61 | 90.7378 | 9   | 1135.87 | 90.4213 |
| 10  | 836.955 | 99.4485 | 11  | 803.206 | 99.0842 | 12  | 673.999 | 93.8082 |

**Figure S20:** IR spectrum of ancistrobrevoline B (**15**).

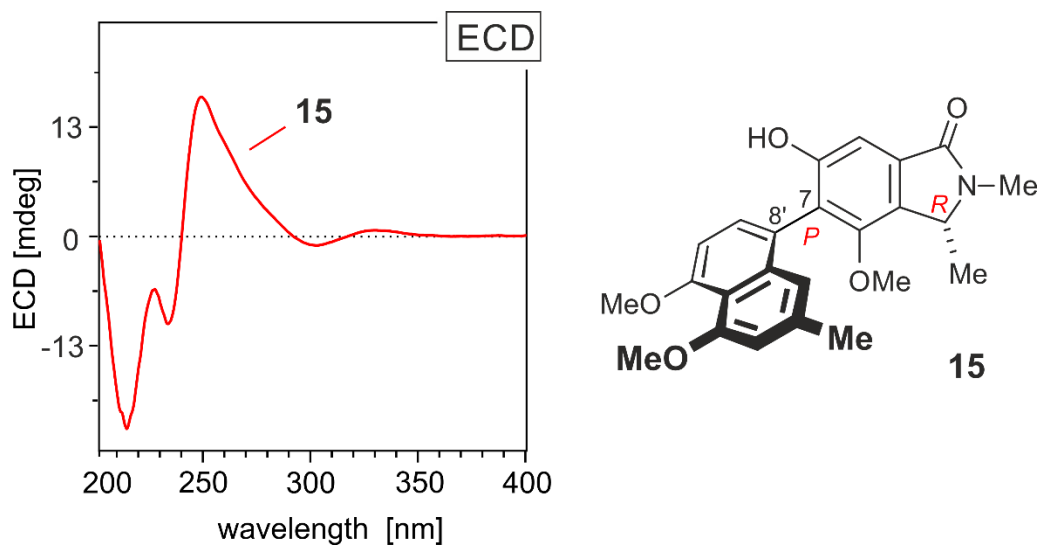

**Figure S21a:** ECD spectrum of ancistrobrevoline B (**15**).

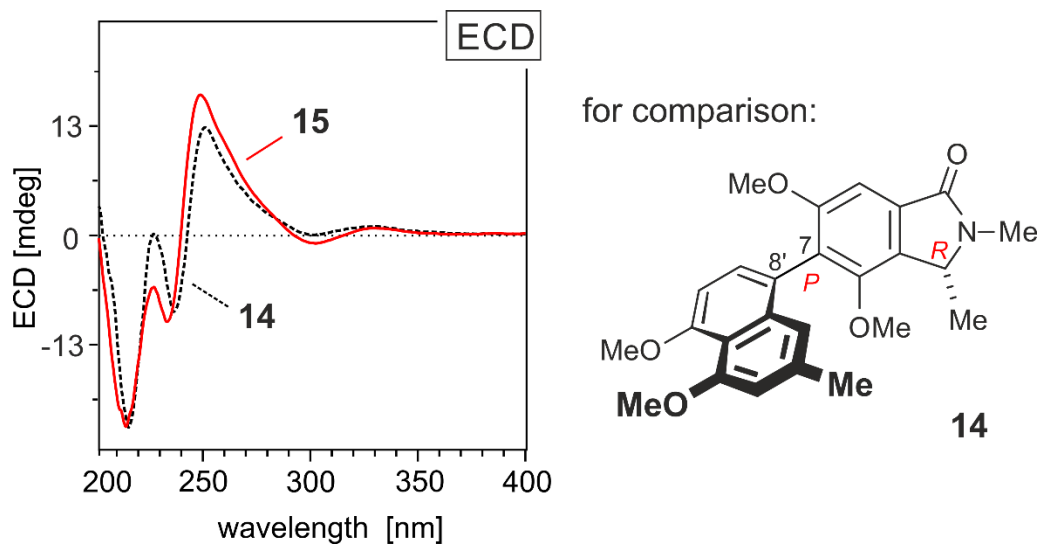

**Figure S21b:** Assignment of the absolute configuration of ancistrobrevoline B (**15**) by comparison of its ECD spectrum with that of ancistrobrevoline A (**14**).

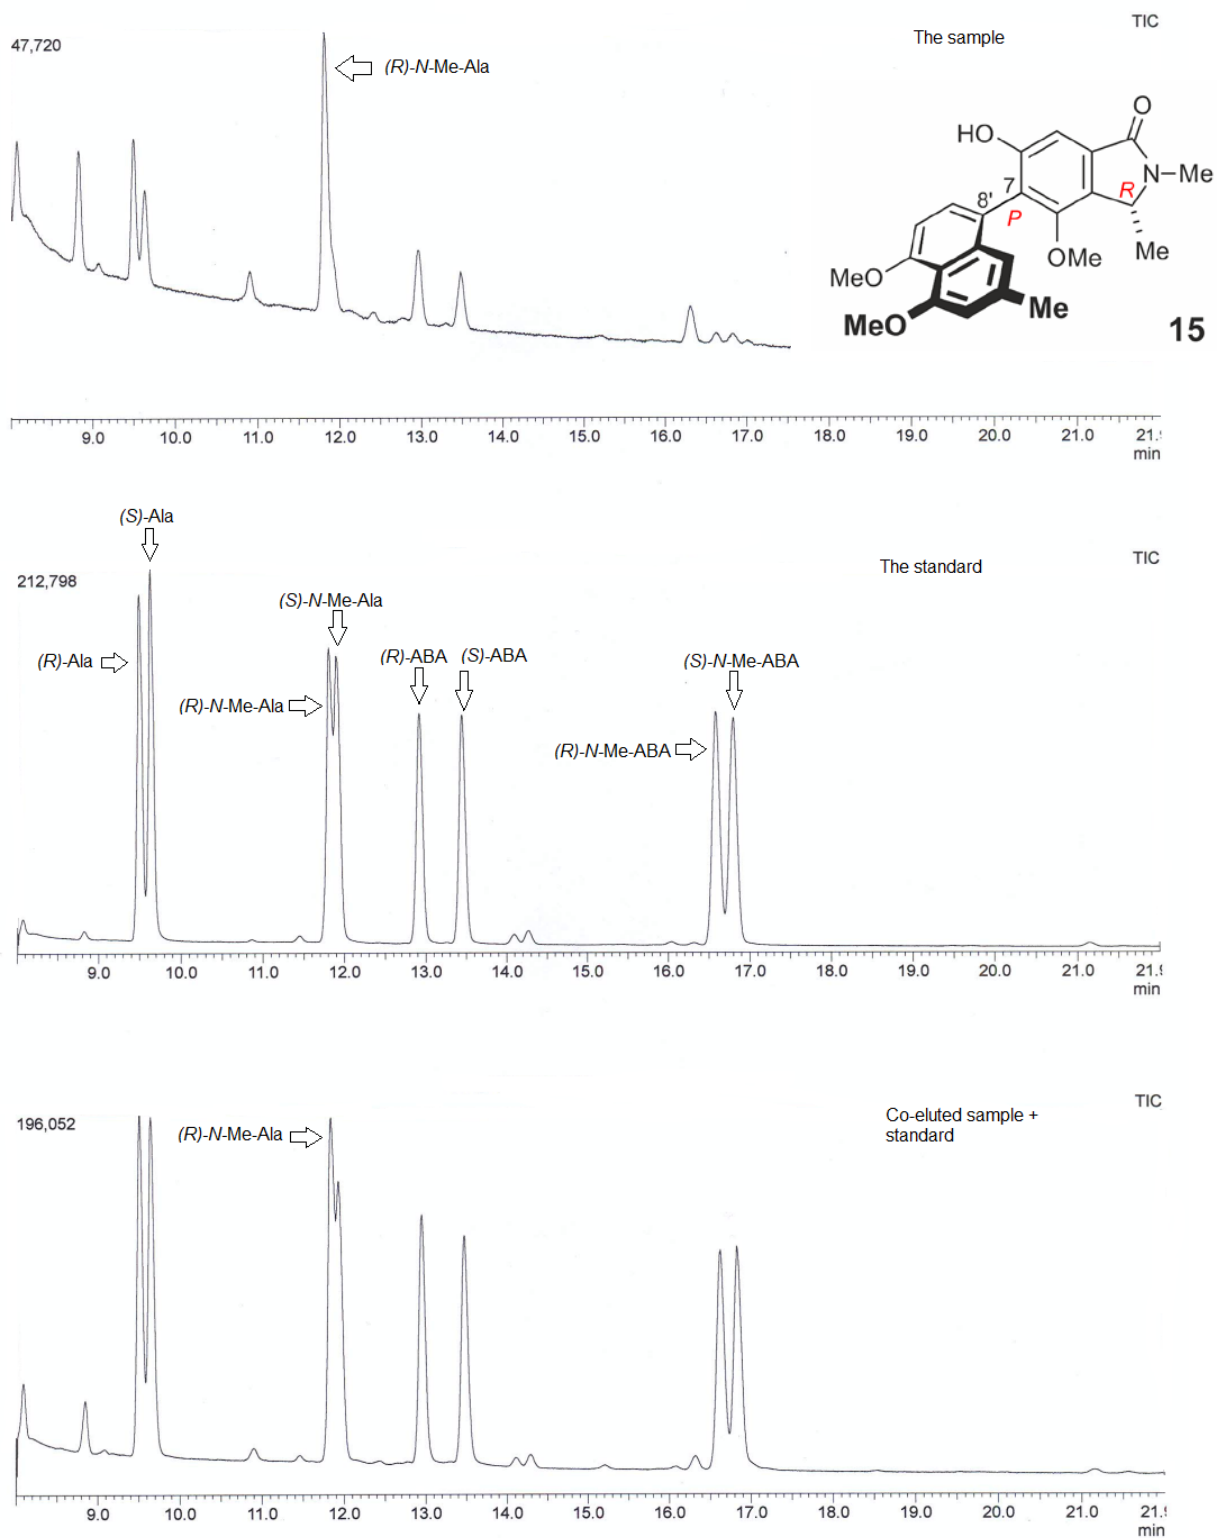

Ala = Alanine

*N*-Me-Ala = *N*-Methylalanine

ABA = 3-Aminobutyric acid

*N*-Me-ABA = *N*-Methyl-3-aminobutyric acid

**Figure S22:** Oxidative degradation of ancistrobrevoline B (15).

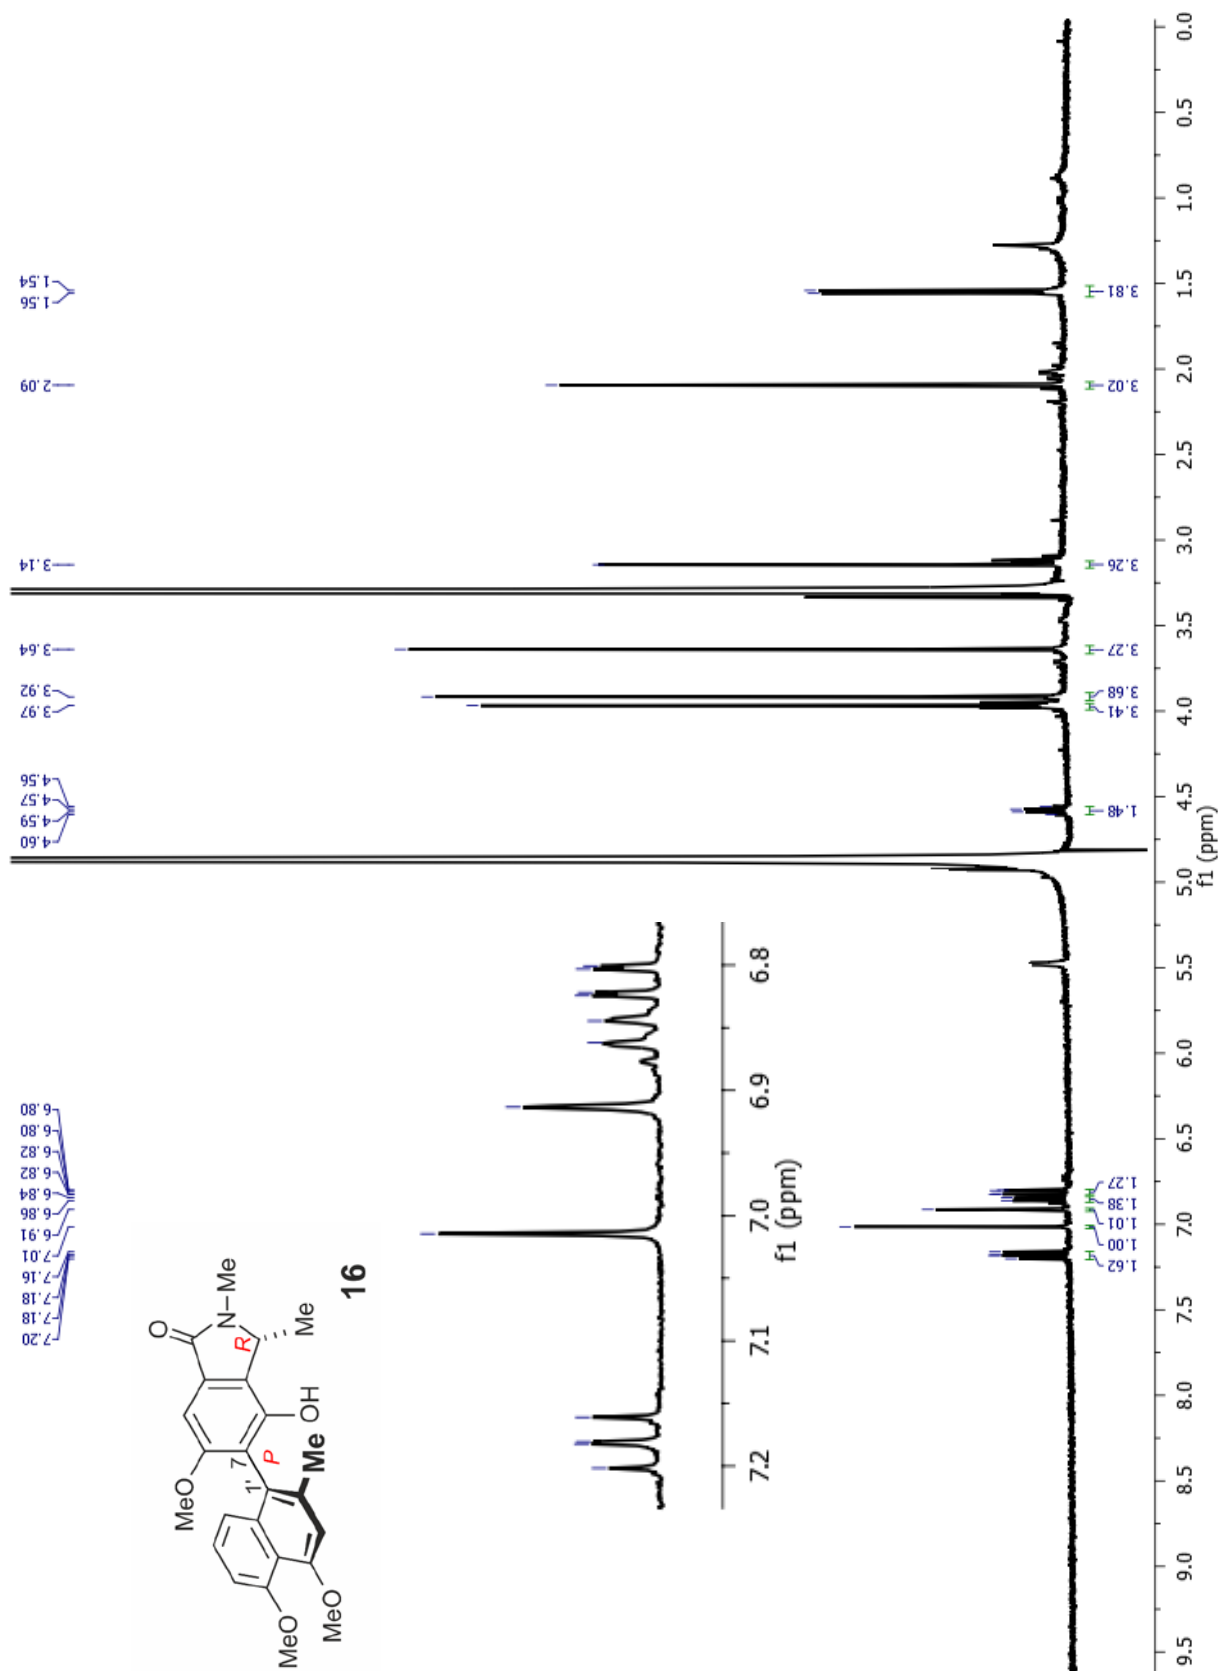

**Figure S23:** <sup>1</sup>H NMR spectrum of ancistrobrevoline C (**16**) in methanol-*d*<sub>4</sub>.

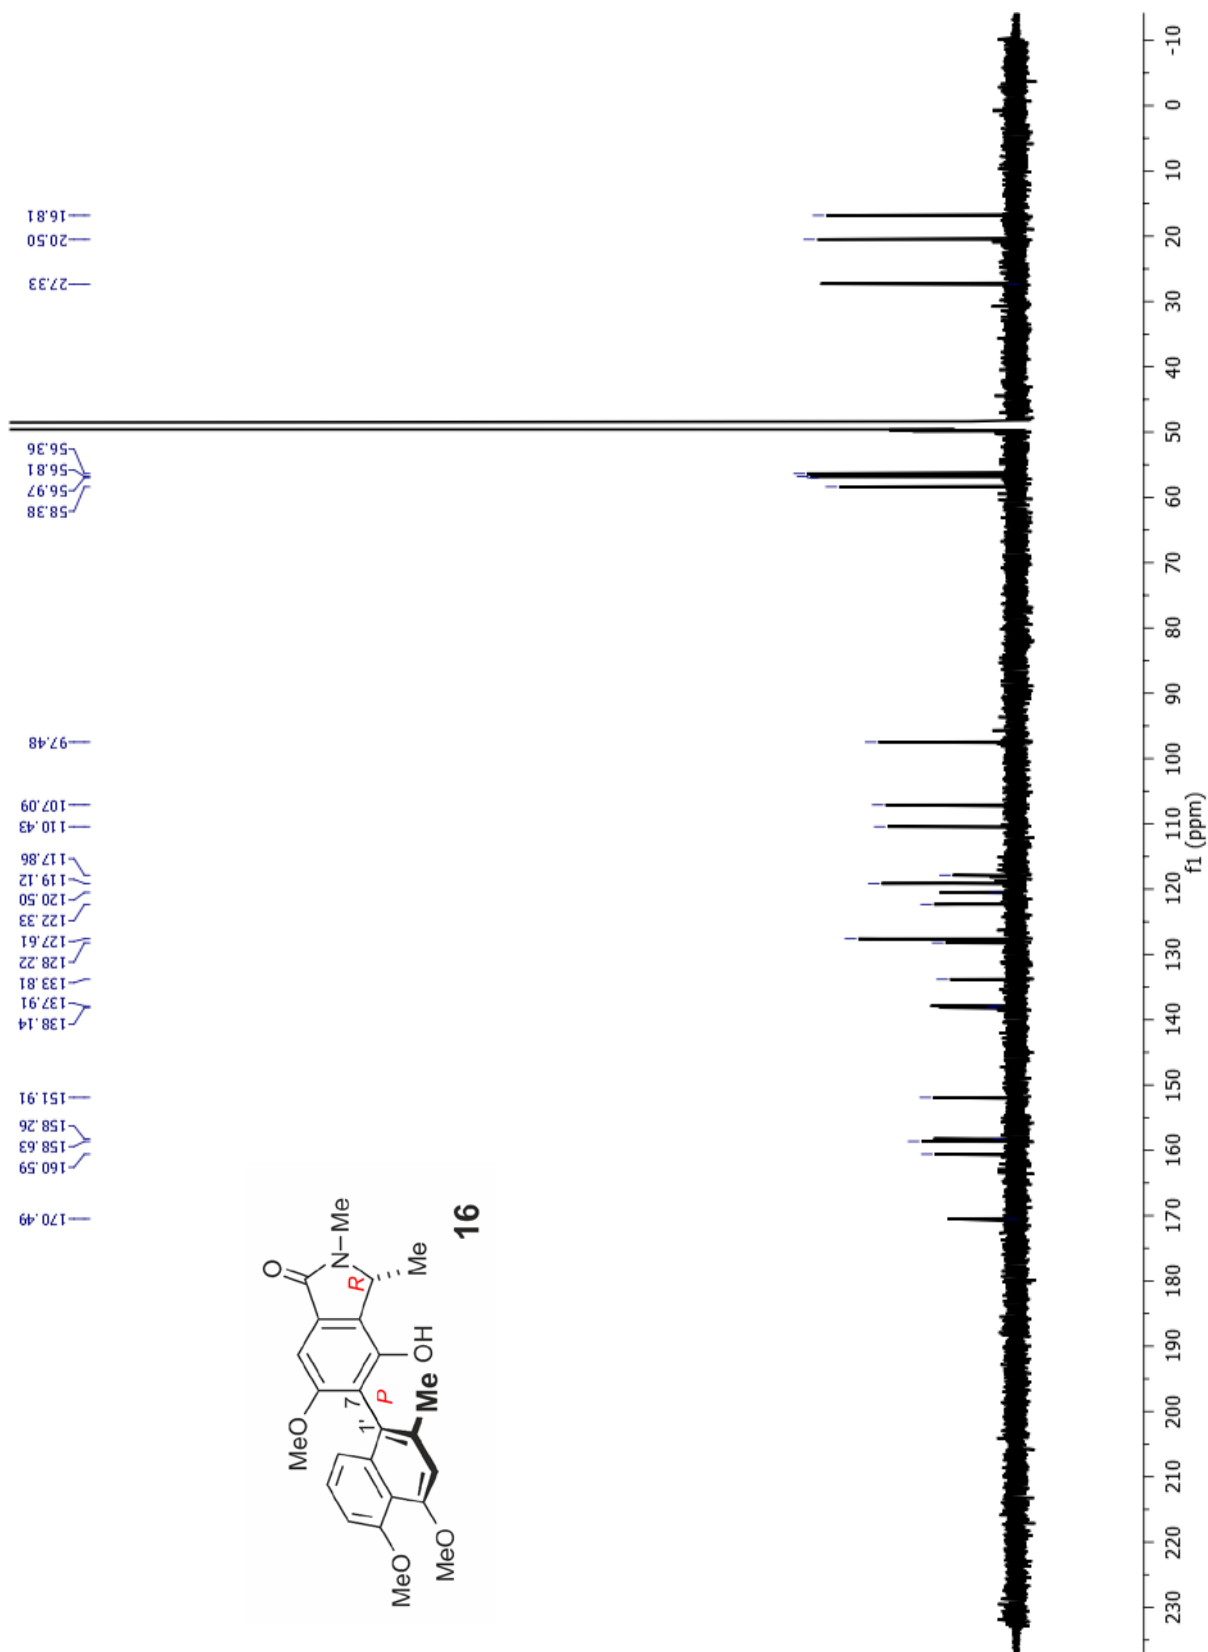

Figure S24:  $^{13}\text{C}$  NMR spectrum of ancistrobrevoline C (**16**) in  $\text{methanol-}d_4$ .

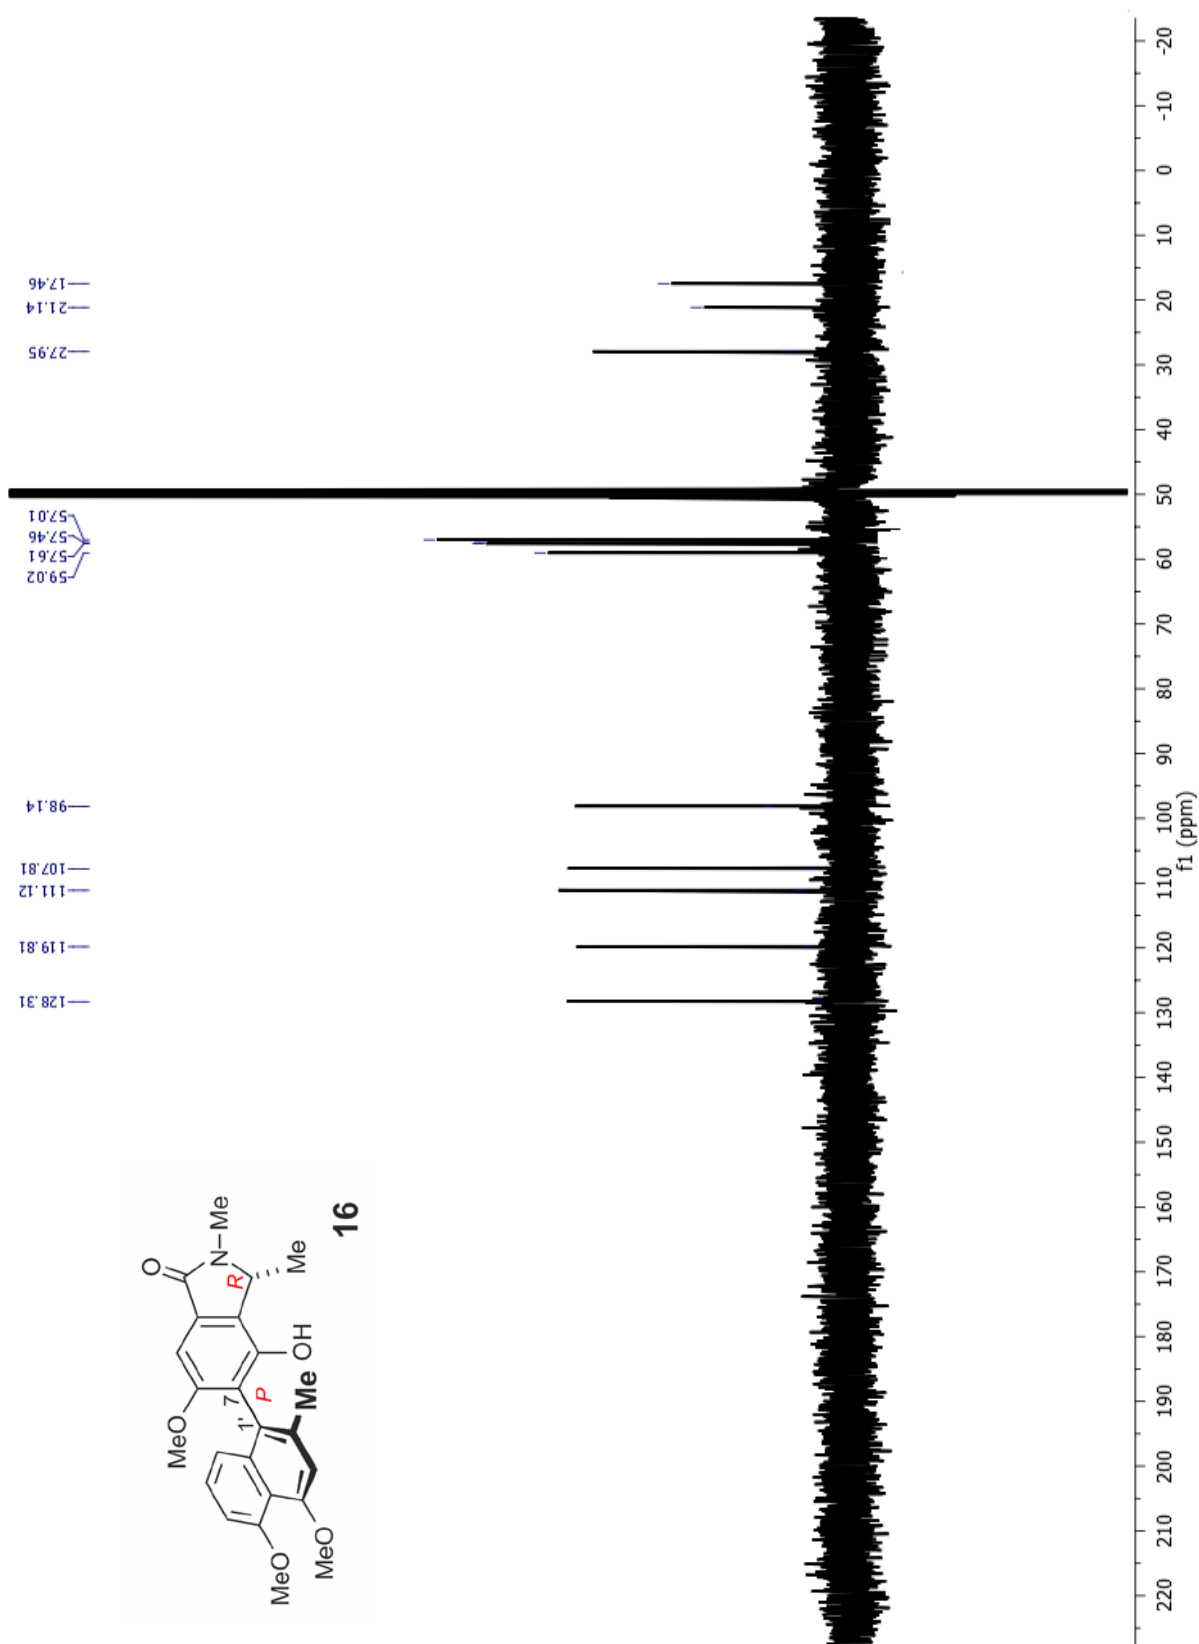

**Figure S25:** <sup>13</sup>C DEPT 135 NMR spectrum ancistrobrevoline C (**16**) in methanol-*d*<sub>4</sub>.

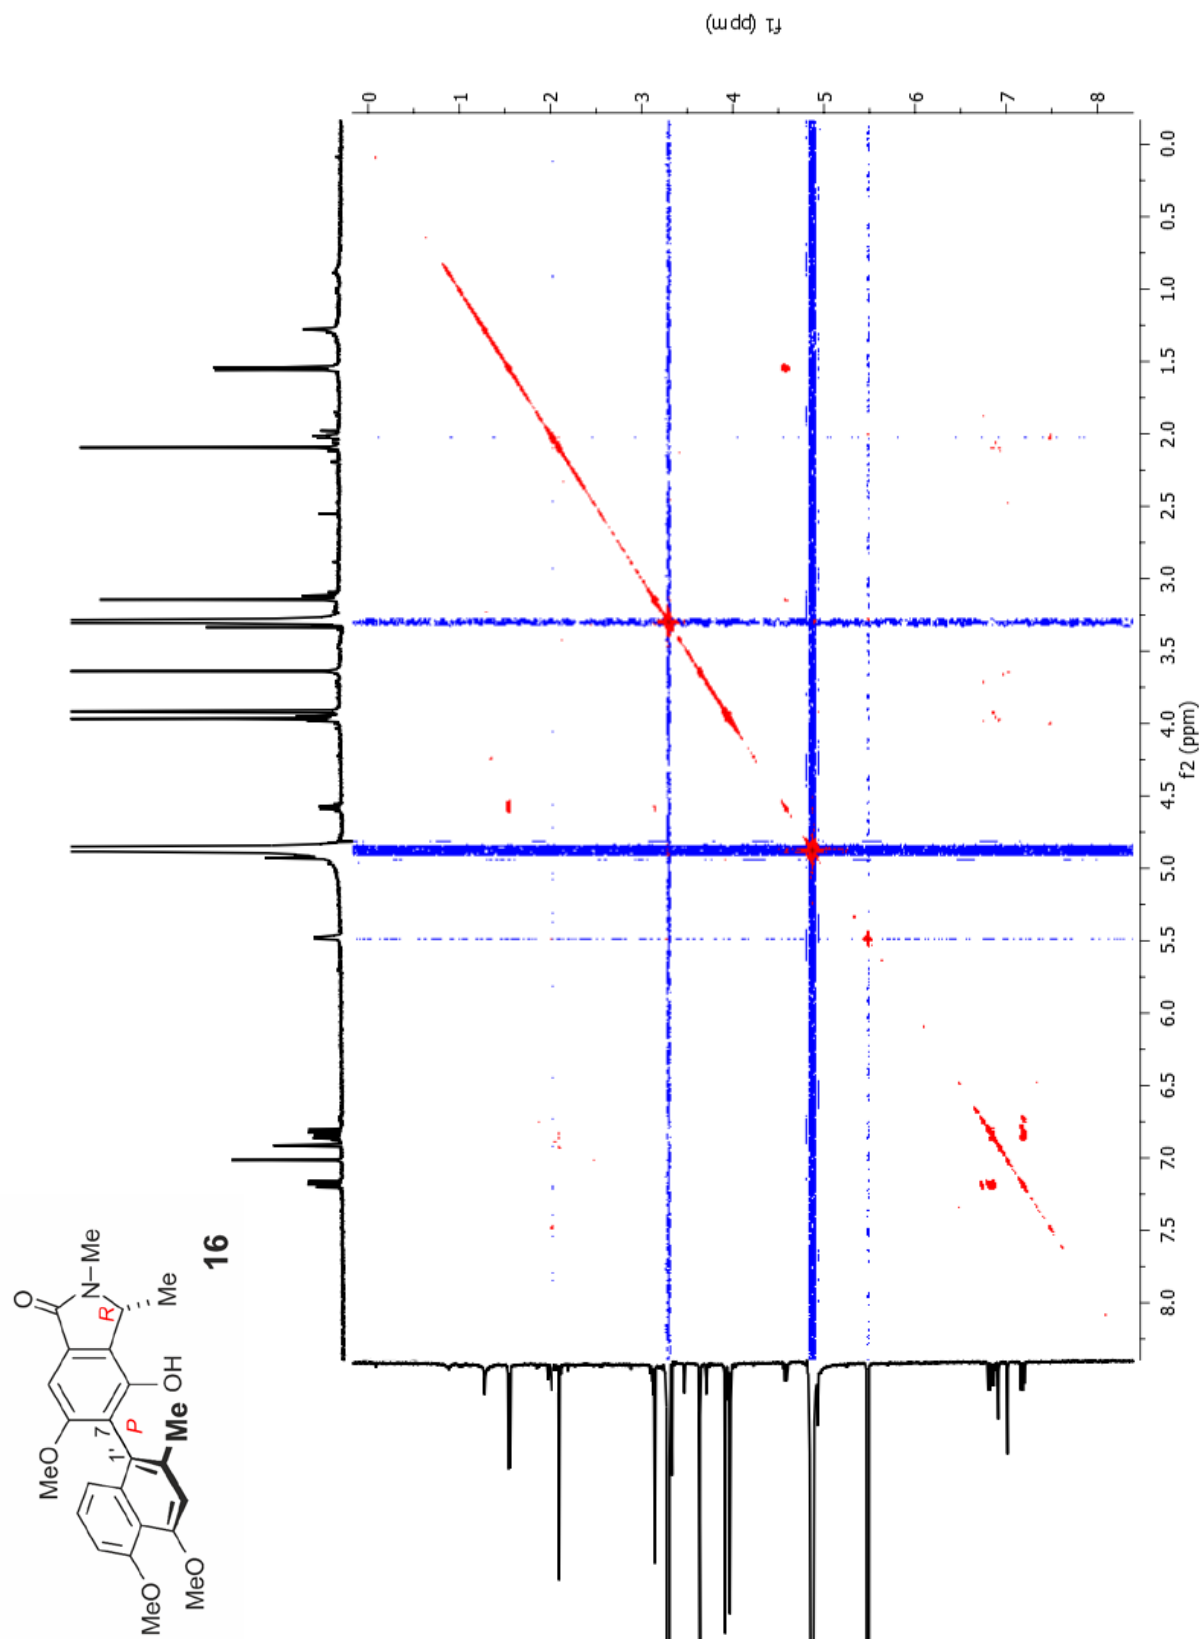

**Figure S26:**  $^1\text{H}$ - $^1\text{H}$  COSY spectrum of ancistrobrevoline C (**16**) in methanol- $d_4$ .

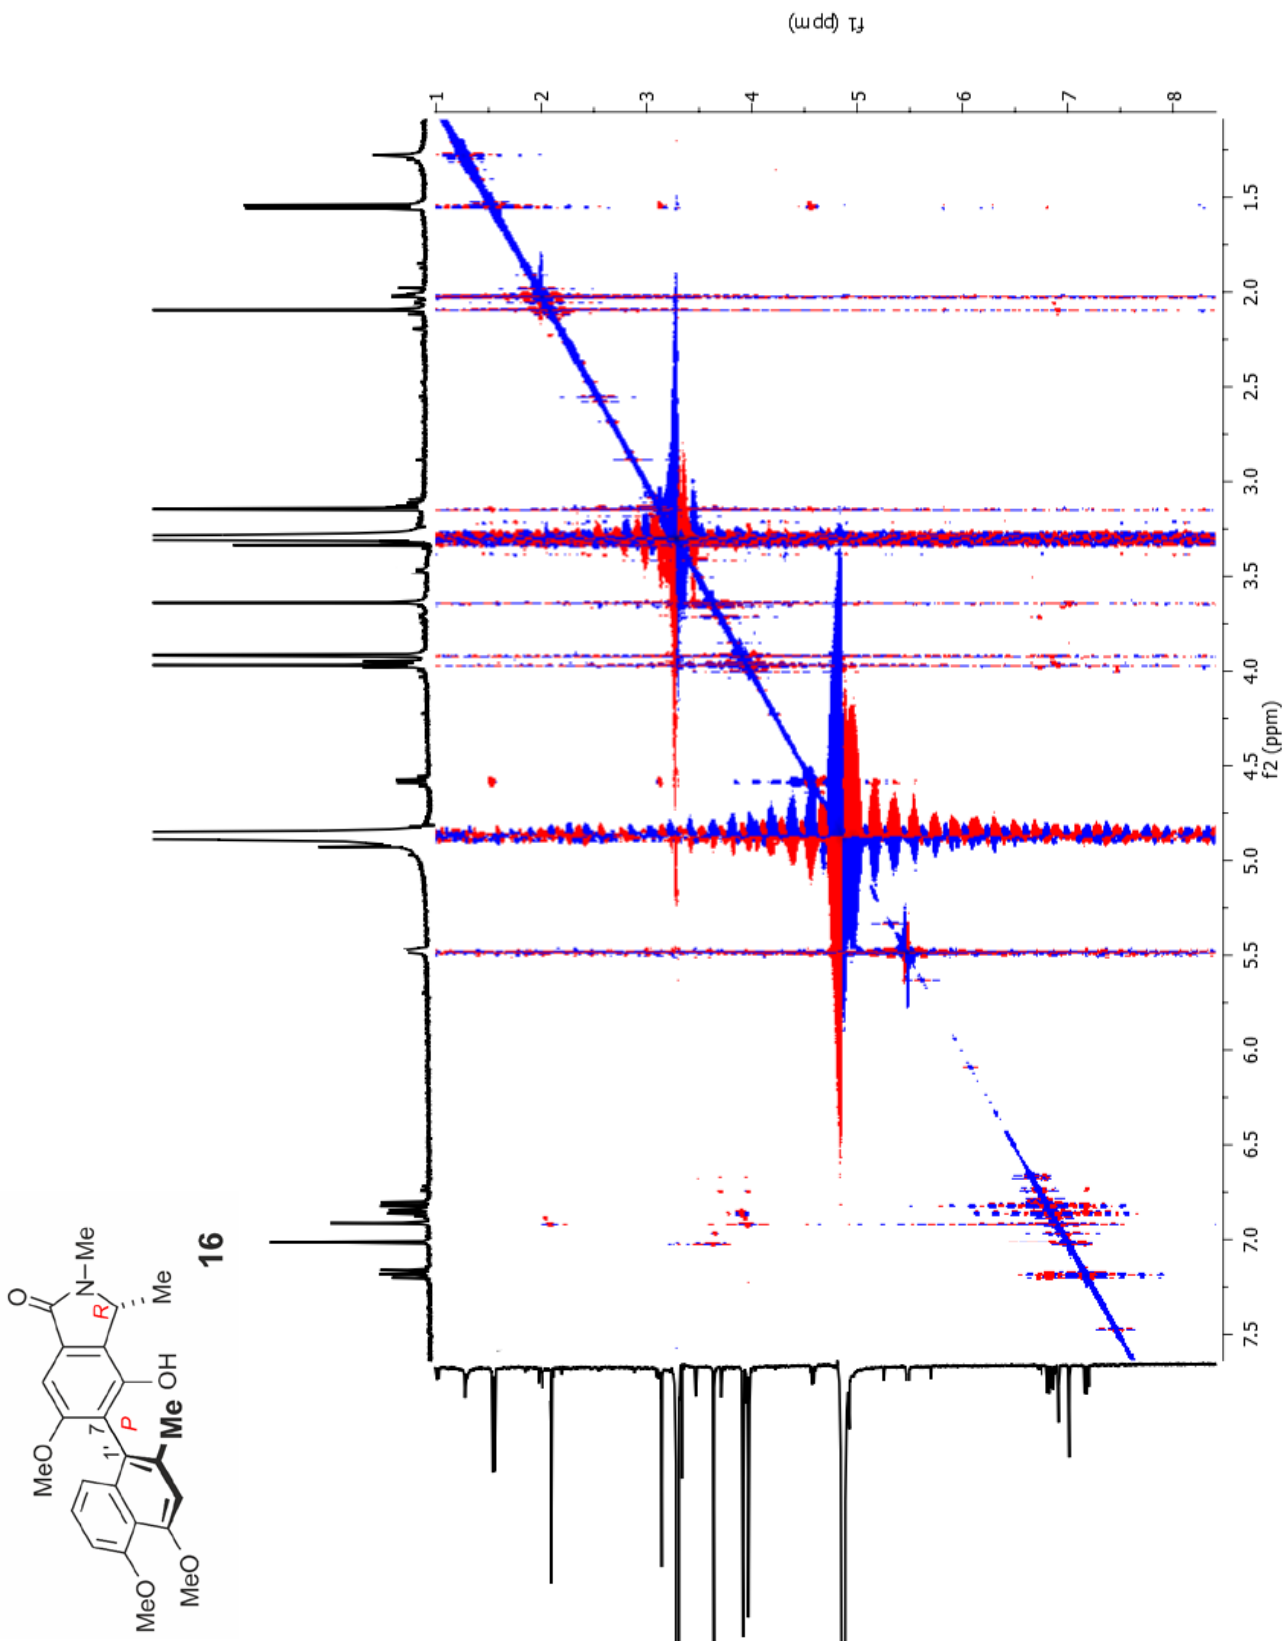

**Figure S27:**  $^1\text{H}$ - $^1\text{H}$  NOESY spectrum of ancistrobrevoline C (**16**) in methanol- $d_4$ .



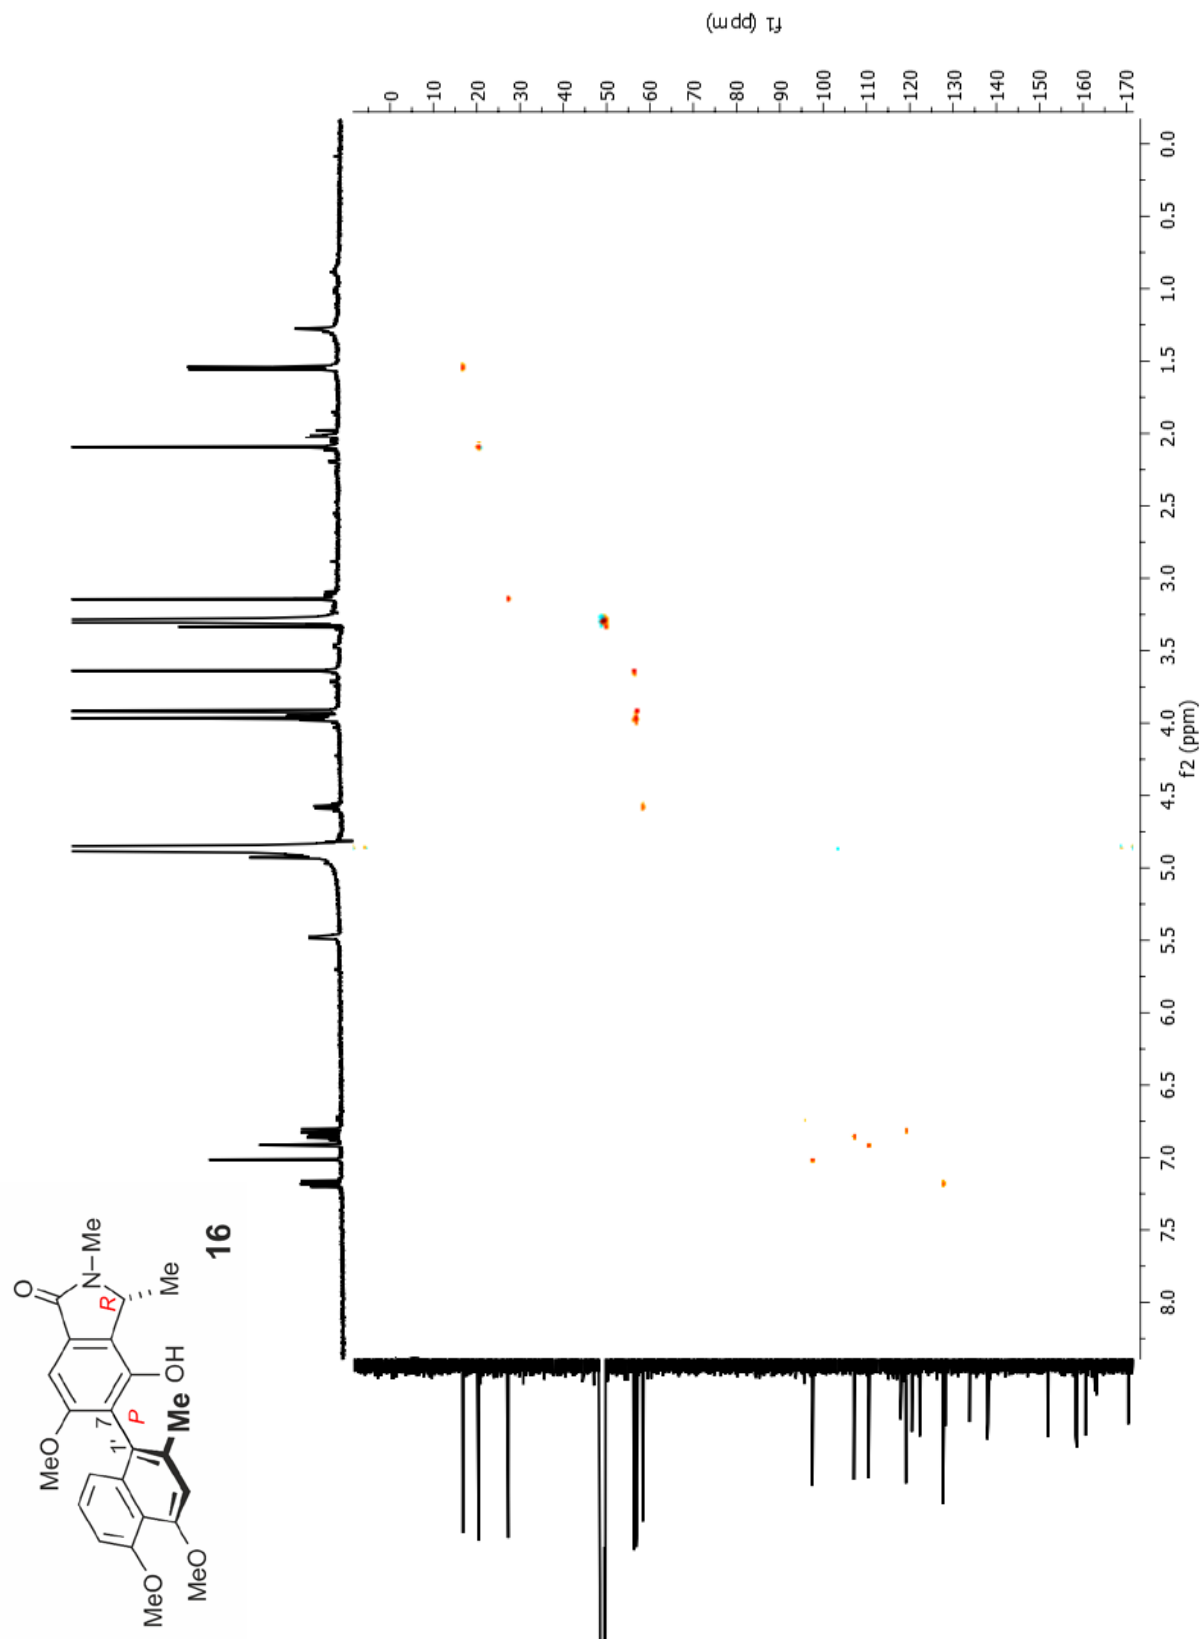

**Figure S28:**  $^1\text{H}$ - $^{13}\text{C}$  HSQC spectrum of ancistrobrevoline C (**16**) in methanol- $d_4$ .

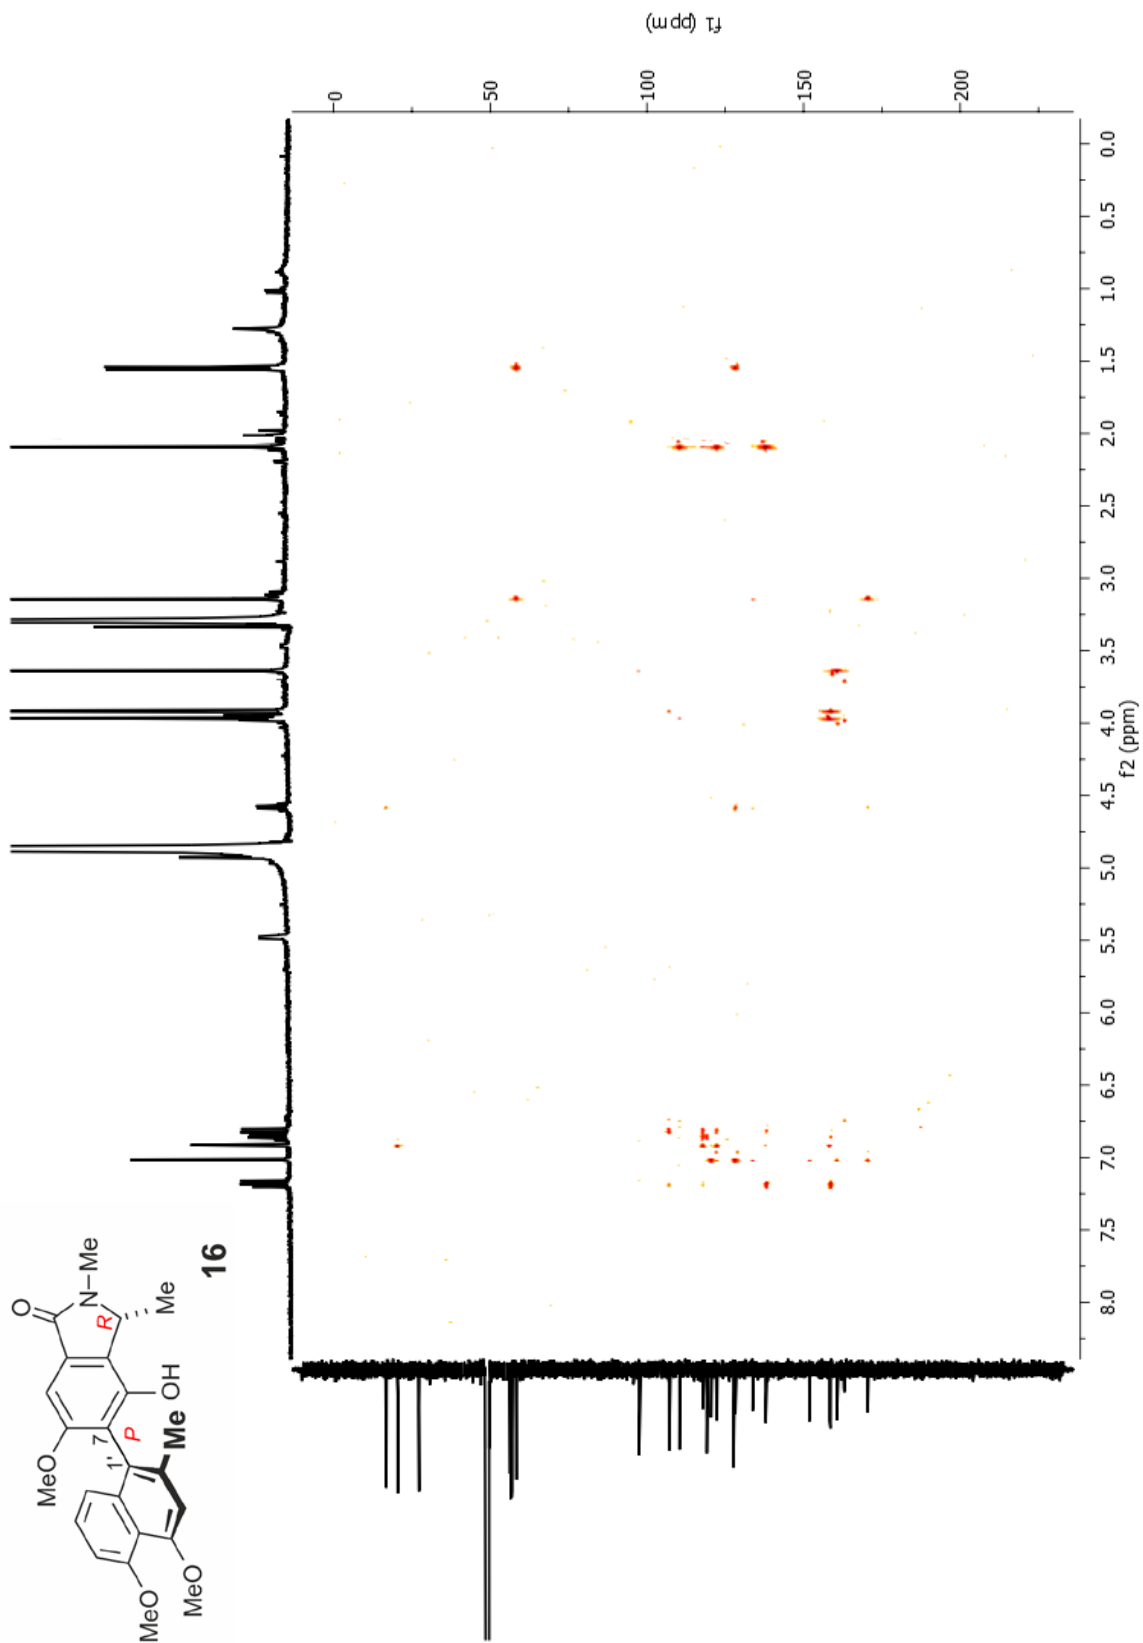

**Figure S29:**  $^1\text{H}$ - $^{13}\text{C}$  HMBC spectrum of ancistrobrevoline C (**16**) in methanol- $d_4$ .

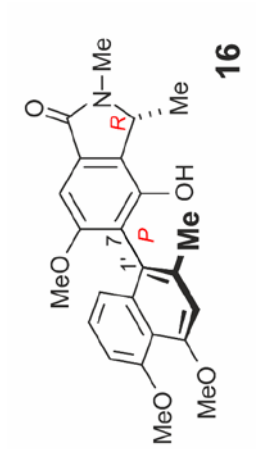

| Acquisition Parameter |            |
|-----------------------|------------|
| Source Type           | ESI        |
| Focus                 | Not active |
| Scan Begin            | 50 m/z     |
| Scan End              | 3500 m/z   |
| Ion Polarity          | Positive   |
| Set Funnel 1 RF       | 100.0 Vpp  |
| Set Funnel 2 RF       | 200.0 Vpp  |
| Set Hexapole RF       | 300.0 Vpp  |
| Set Nebulizer         | 0.3 Bar    |
| Set Dry Heater        | 200 °C     |
| Set Dry Gas           | 5.0 l/min  |
| Set Divert Valve      | Source     |

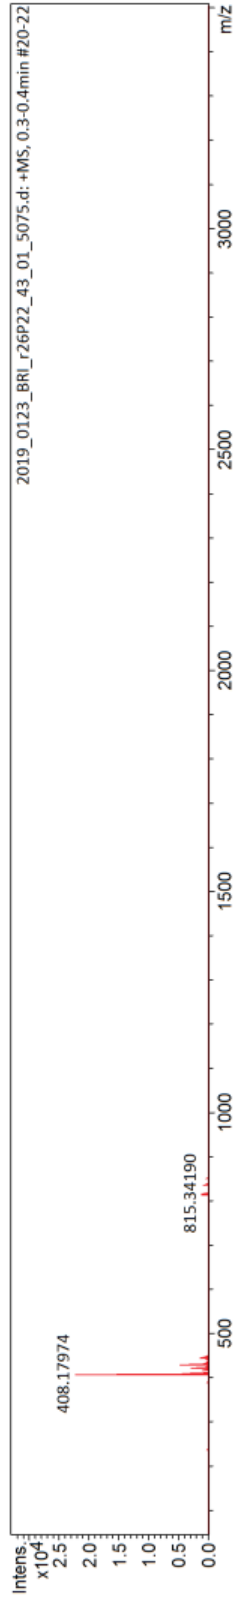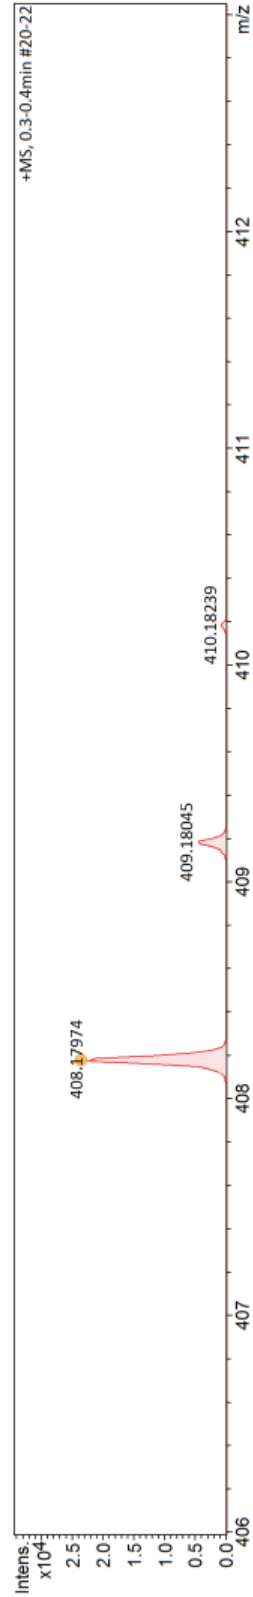

| Meas. m/z | # | Ion Formula                                     | m/z       | err [ppm] | mSigma | # mSigma | Score  | rdb  | e <sup>-</sup> Conf | N-Rule |
|-----------|---|-------------------------------------------------|-----------|-----------|--------|----------|--------|------|---------------------|--------|
| 408.17974 | 1 | C <sub>24</sub> H <sub>26</sub> NO <sub>5</sub> | 408.18055 | 1.98      | 38.9   | 1        | 100.00 | 12.5 | even                | ok     |

**Figure S30:** HR-ESI-MS spectrum of ancistrobrevoline C (**16**).

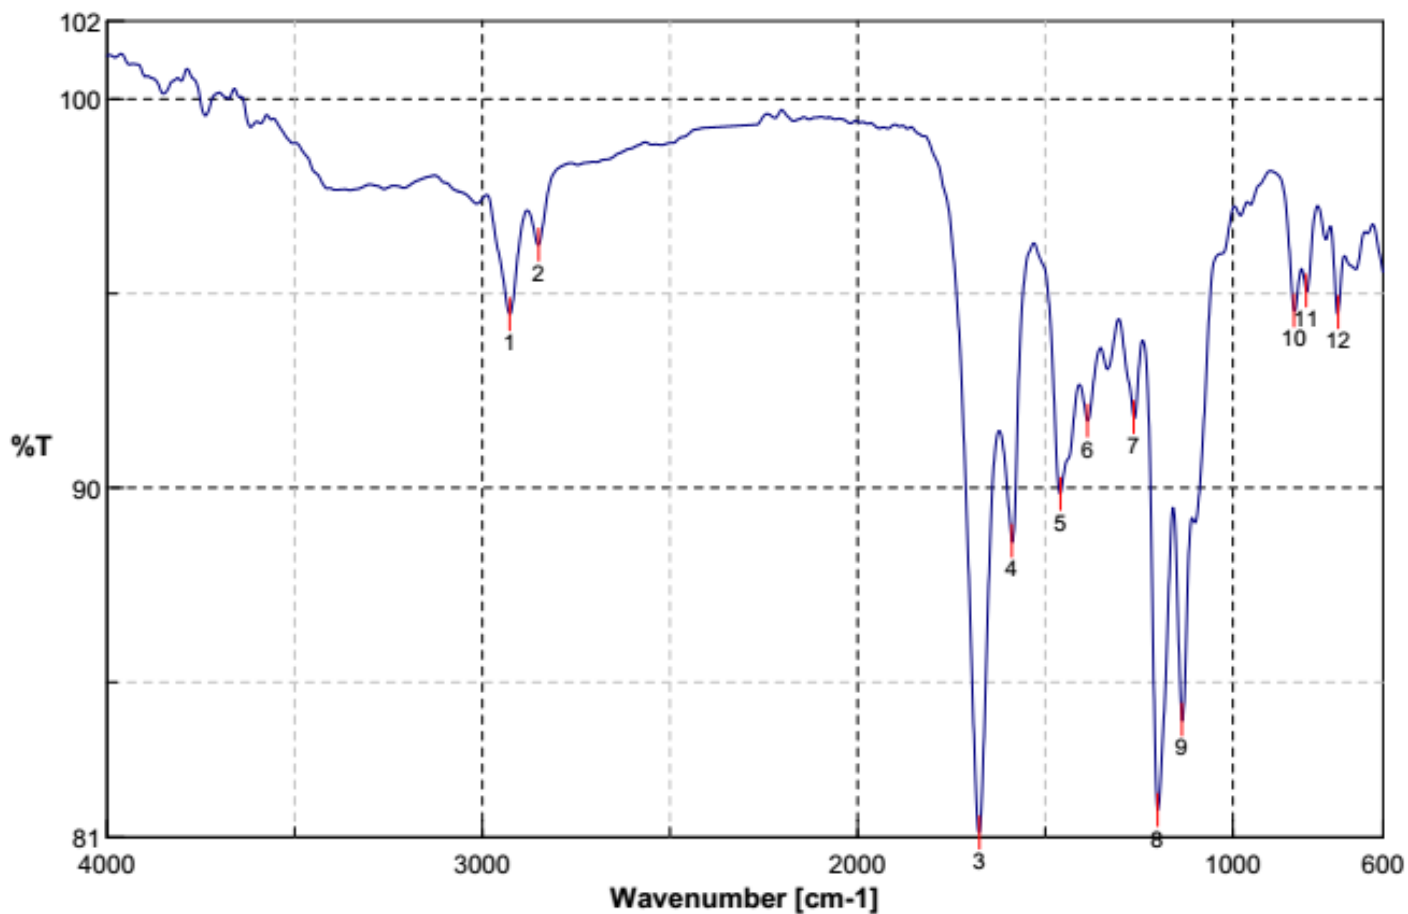

Accumulation 8  
 Resolution 4 cm<sup>-1</sup>  
 Zero Filling ON  
 Apodization Cosine  
 Gain Auto (4)  
 Scanning Speed Auto (2 mm/sec)  
 Date/Time 27.02.2019 11:06  
 Update 27.02.2019 17:52  
 Operator Student  
 File Name Memory#1  
 Sample Name  
 Comment

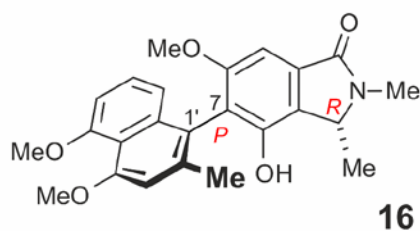

| No. | cm-1    | %T      | No. | cm-1    | %T      | No. | cm-1    | %T      |
|-----|---------|---------|-----|---------|---------|-----|---------|---------|
| 1   | 2927.41 | 94.4691 | 2   | 2850.27 | 96.2528 | 3   | 1675.84 | 81.1278 |
| 4   | 1589.06 | 88.6392 | 5   | 1459.85 | 89.846  | 6   | 1387.53 | 91.7289 |
| 7   | 1264.11 | 91.819  | 8   | 1200.47 | 81.7163 | 9   | 1135.87 | 84.0448 |
| 10  | 836.955 | 94.5601 | 11  | 805.135 | 95.0775 | 12  | 719.318 | 94.5178 |

Figure S31: IR spectrum of ancistrobrevoline C (**16**).

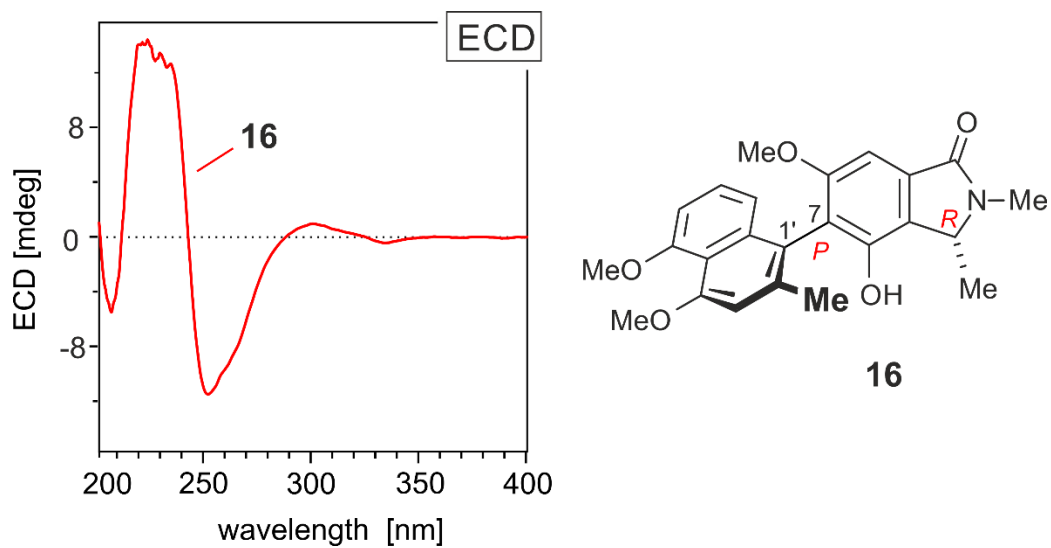

**Figure S32a:** ECD spectrum of ancistrobrevoline C (**16**).

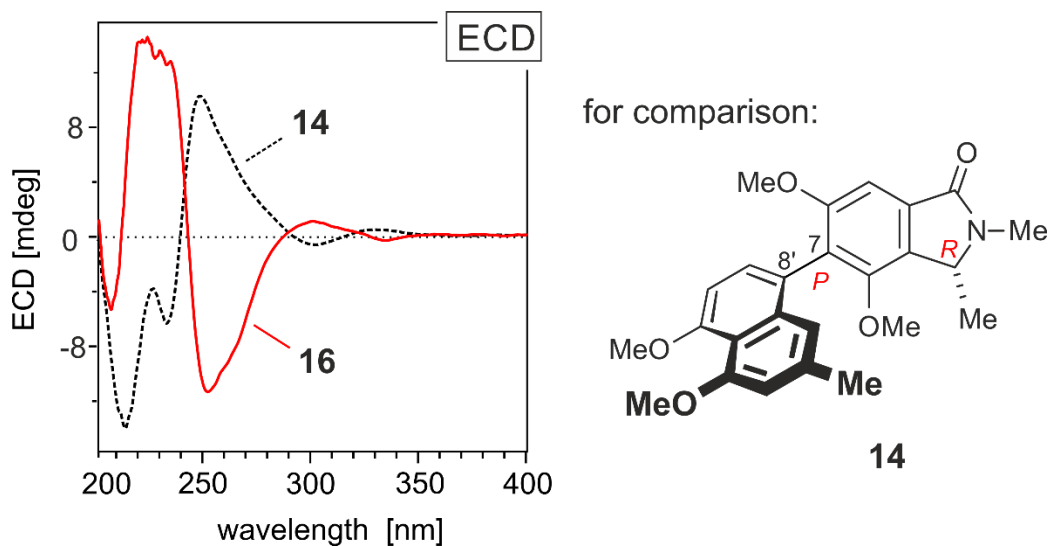

**Figure S32b:** Assignment of the absolute configuration of ancistrobrevoline C (**16**) by comparison of its ECD spectrum with that of ancistrobrevoline A (**14**).

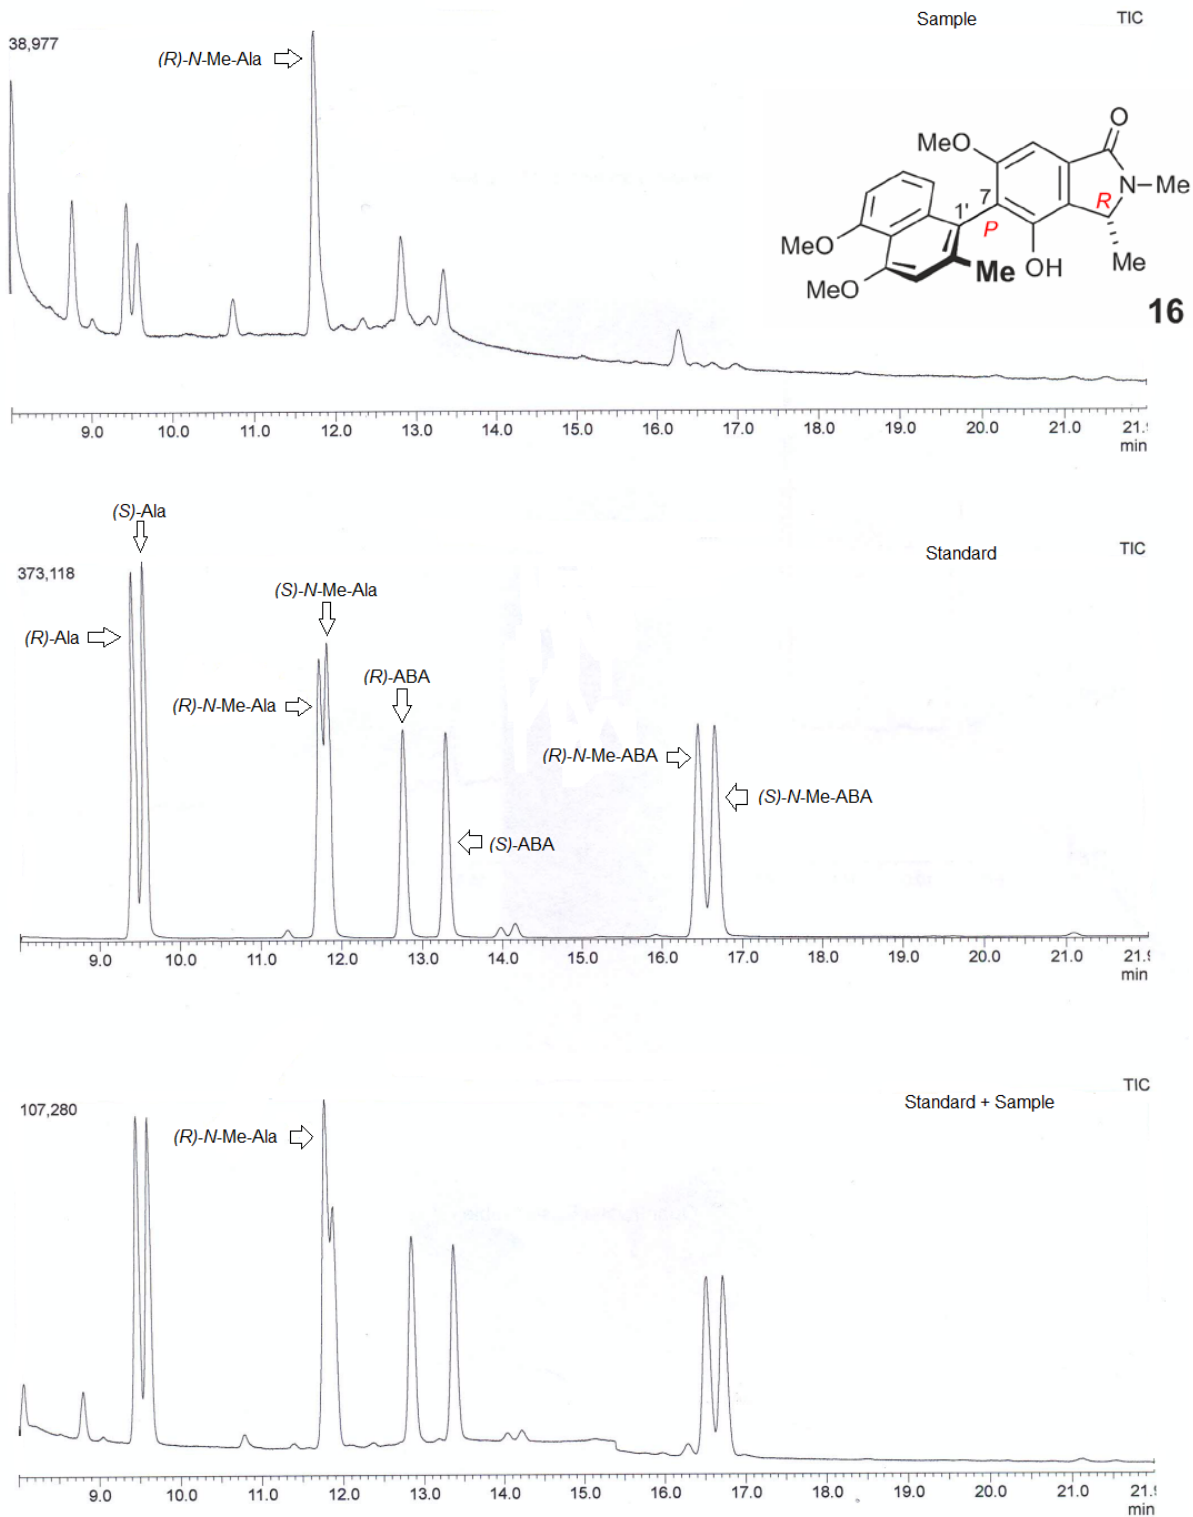

Ala = Alanine

N-Me-Ala = N-Methylalanine

ABA = 3-Aminobutyric acid

N-Me-ABA = N-Methyl-3-aminobutyric acid

**Figure S33:** Oxidative degradation of ancistrobrevoline C (**16**).

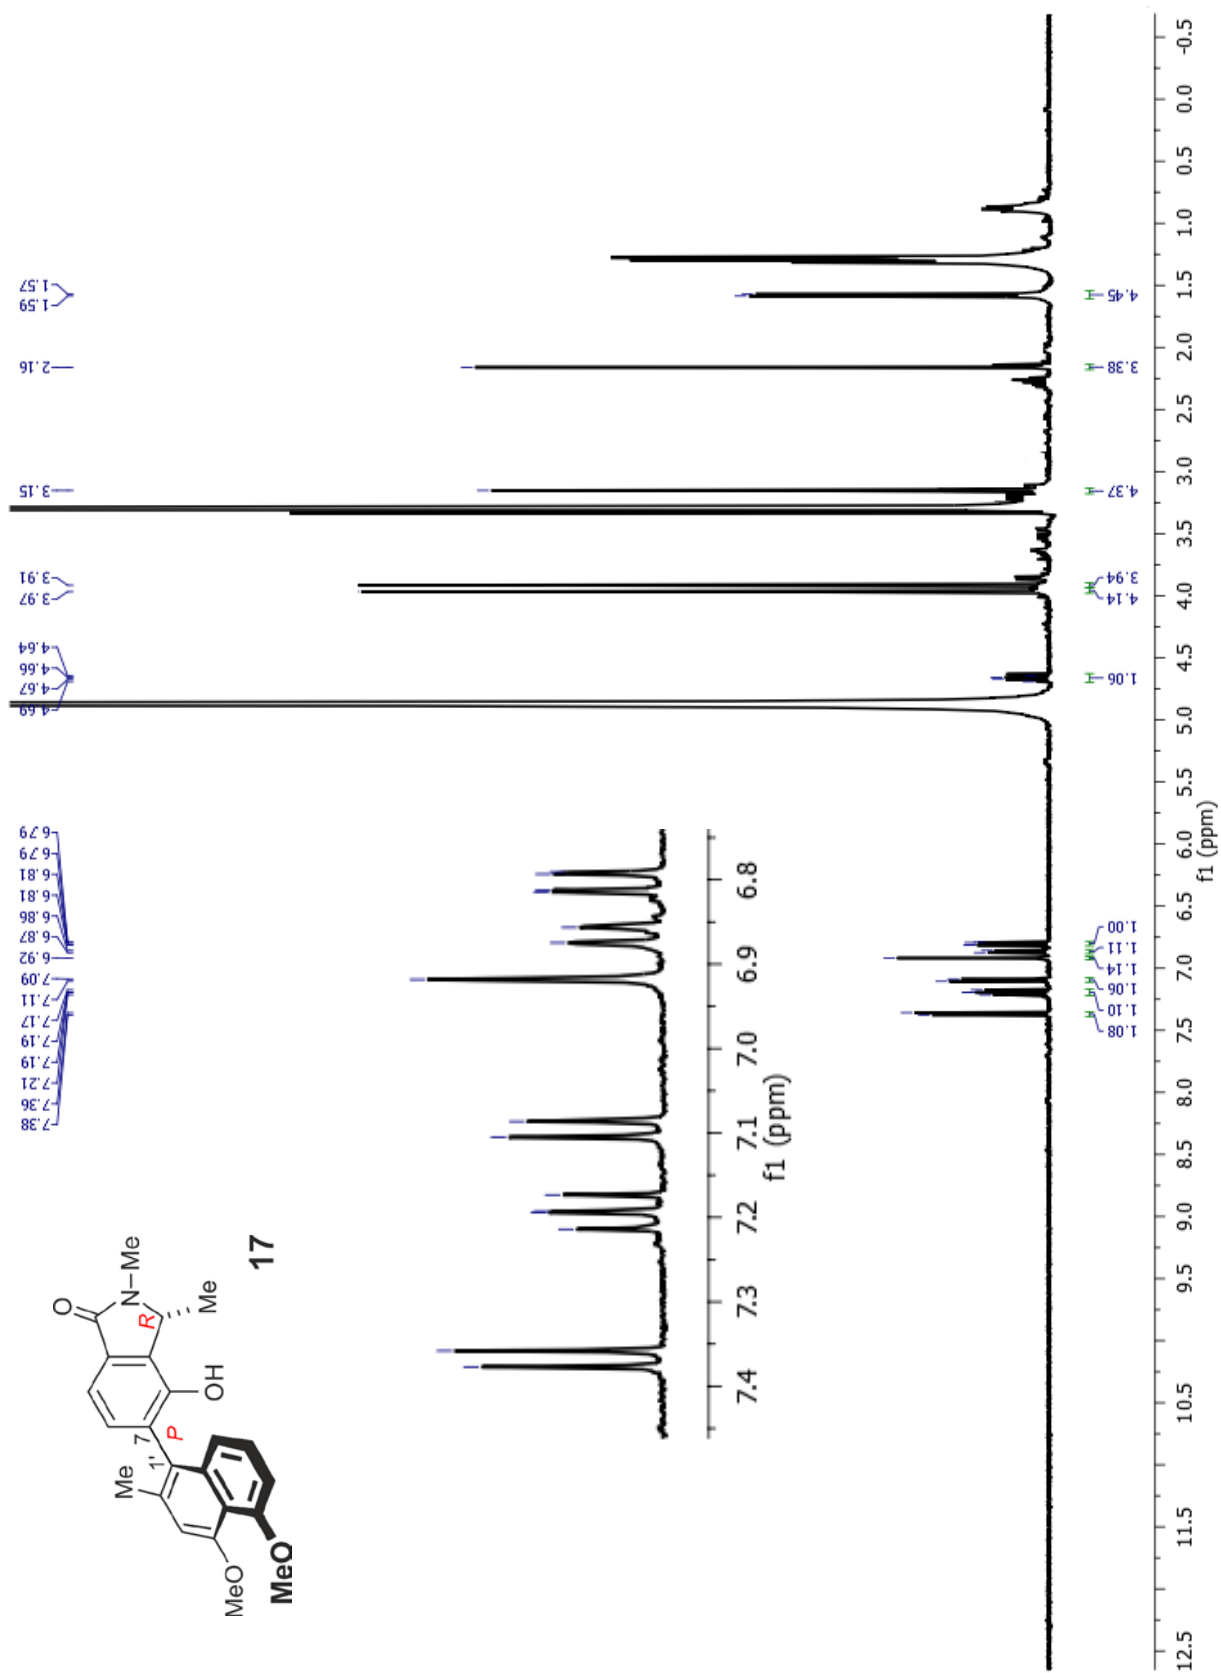

**Figure S34:**  $^1\text{H}$  NMR spectrum of ancistrobrevoline D (**17**) in  $\text{methanol-}d_4$ .

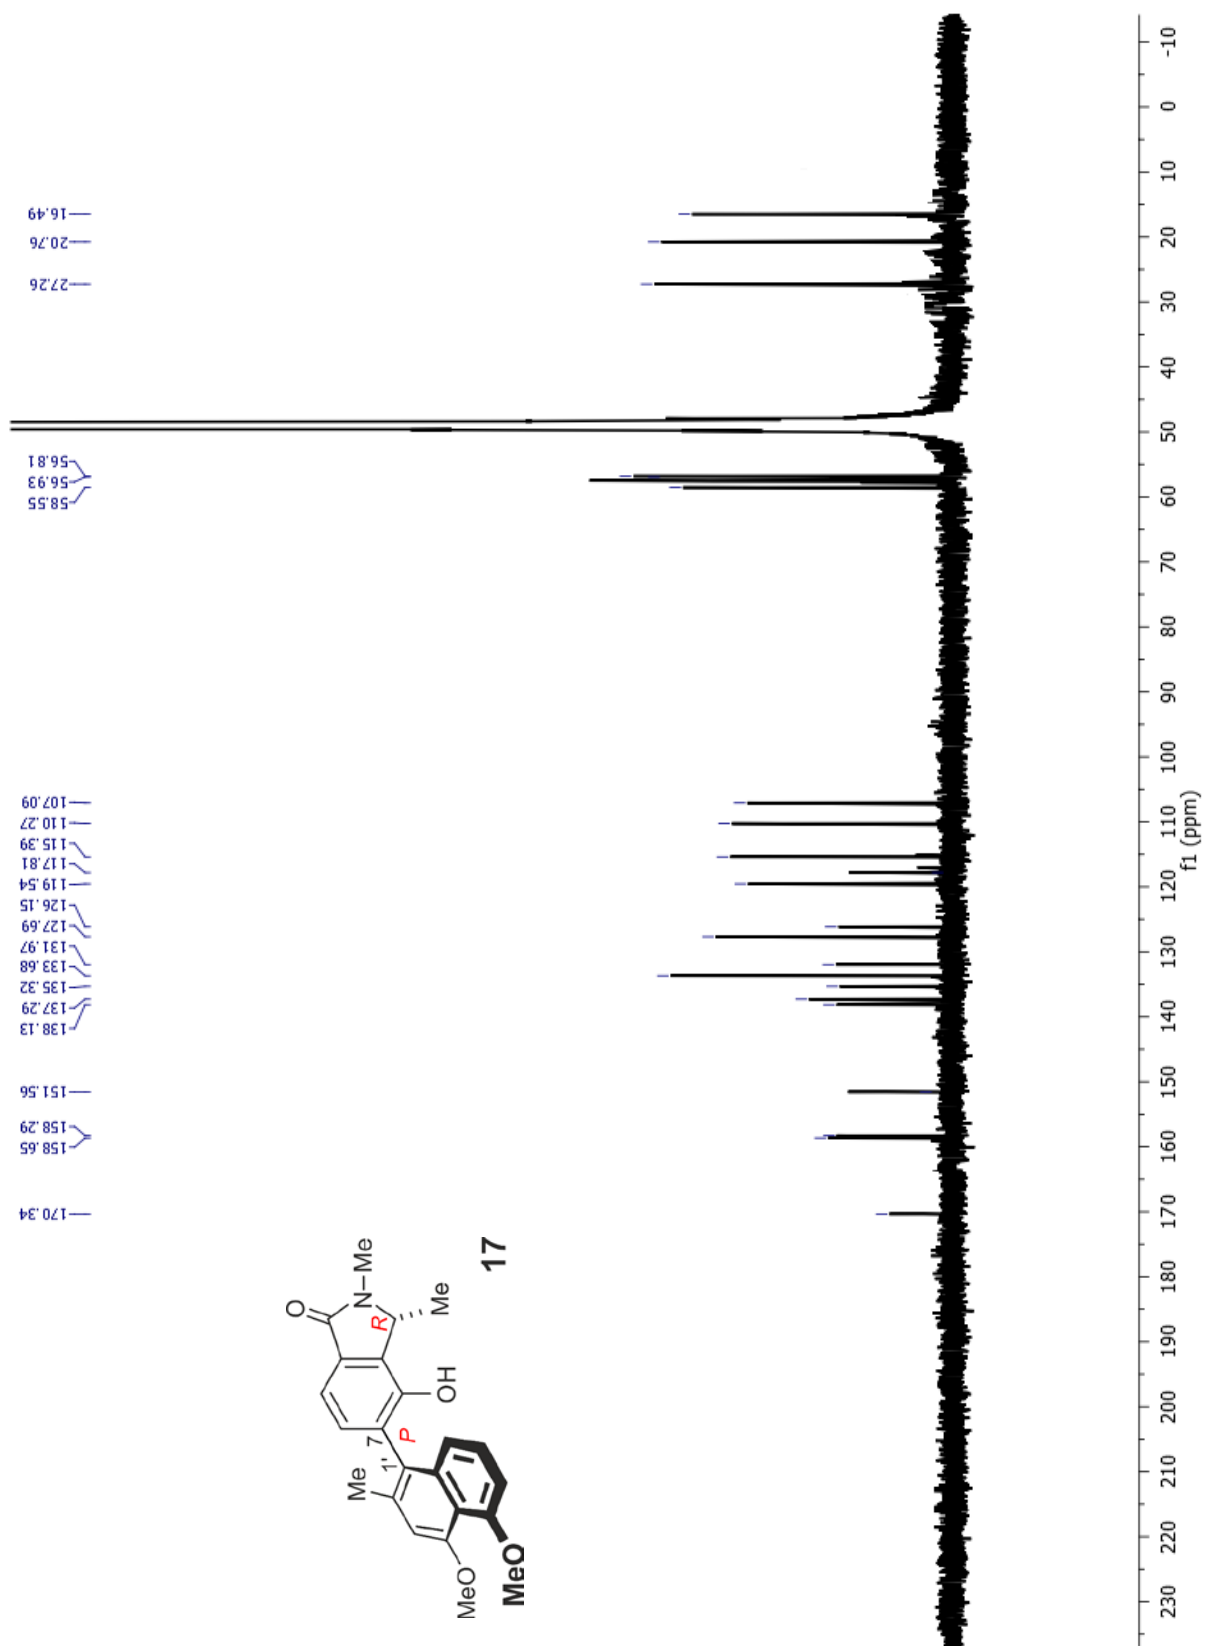

**Figure S35:**  $^{13}\text{C}$  NMR spectrum of ancistrobrevoline D (17) in methanol- $d_4$ .



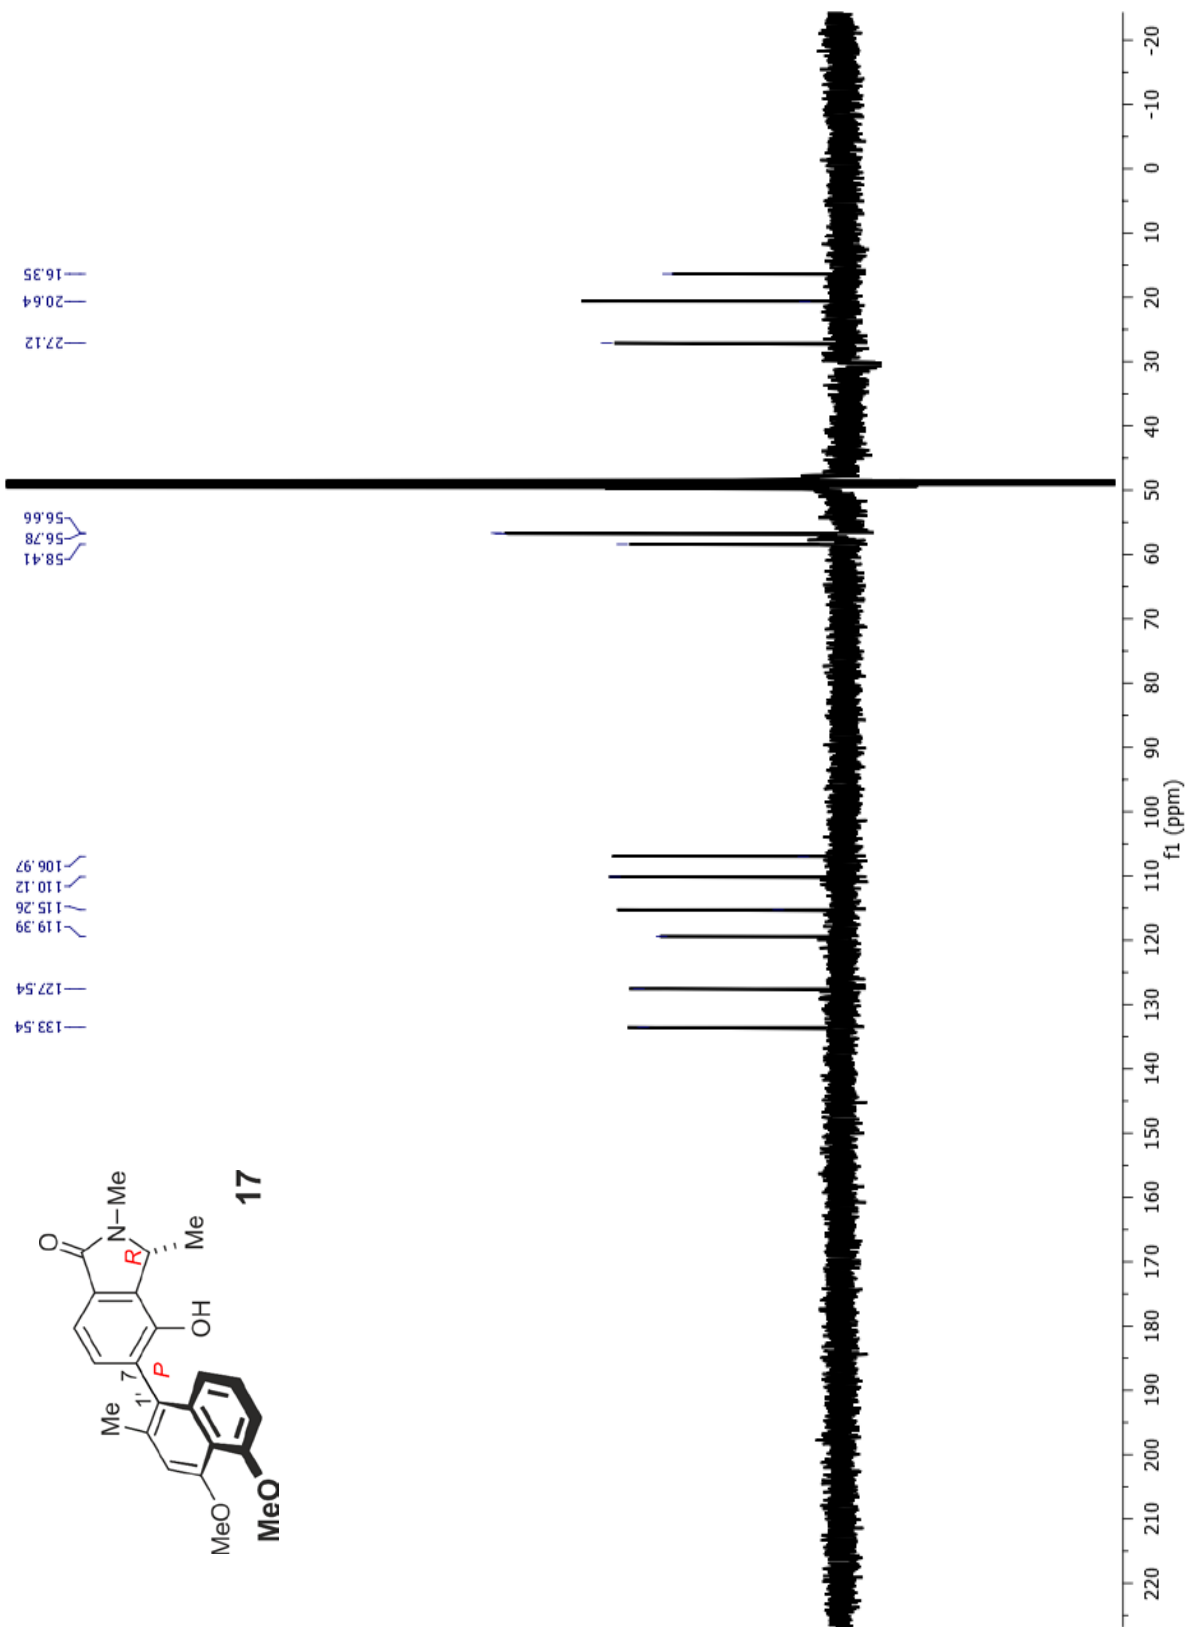

**Figure S36:**  $^{13}\text{C}$  DEPT 135 NMR spectrum ancistrobrevoline D (**17**) in methanol- $d_4$ .

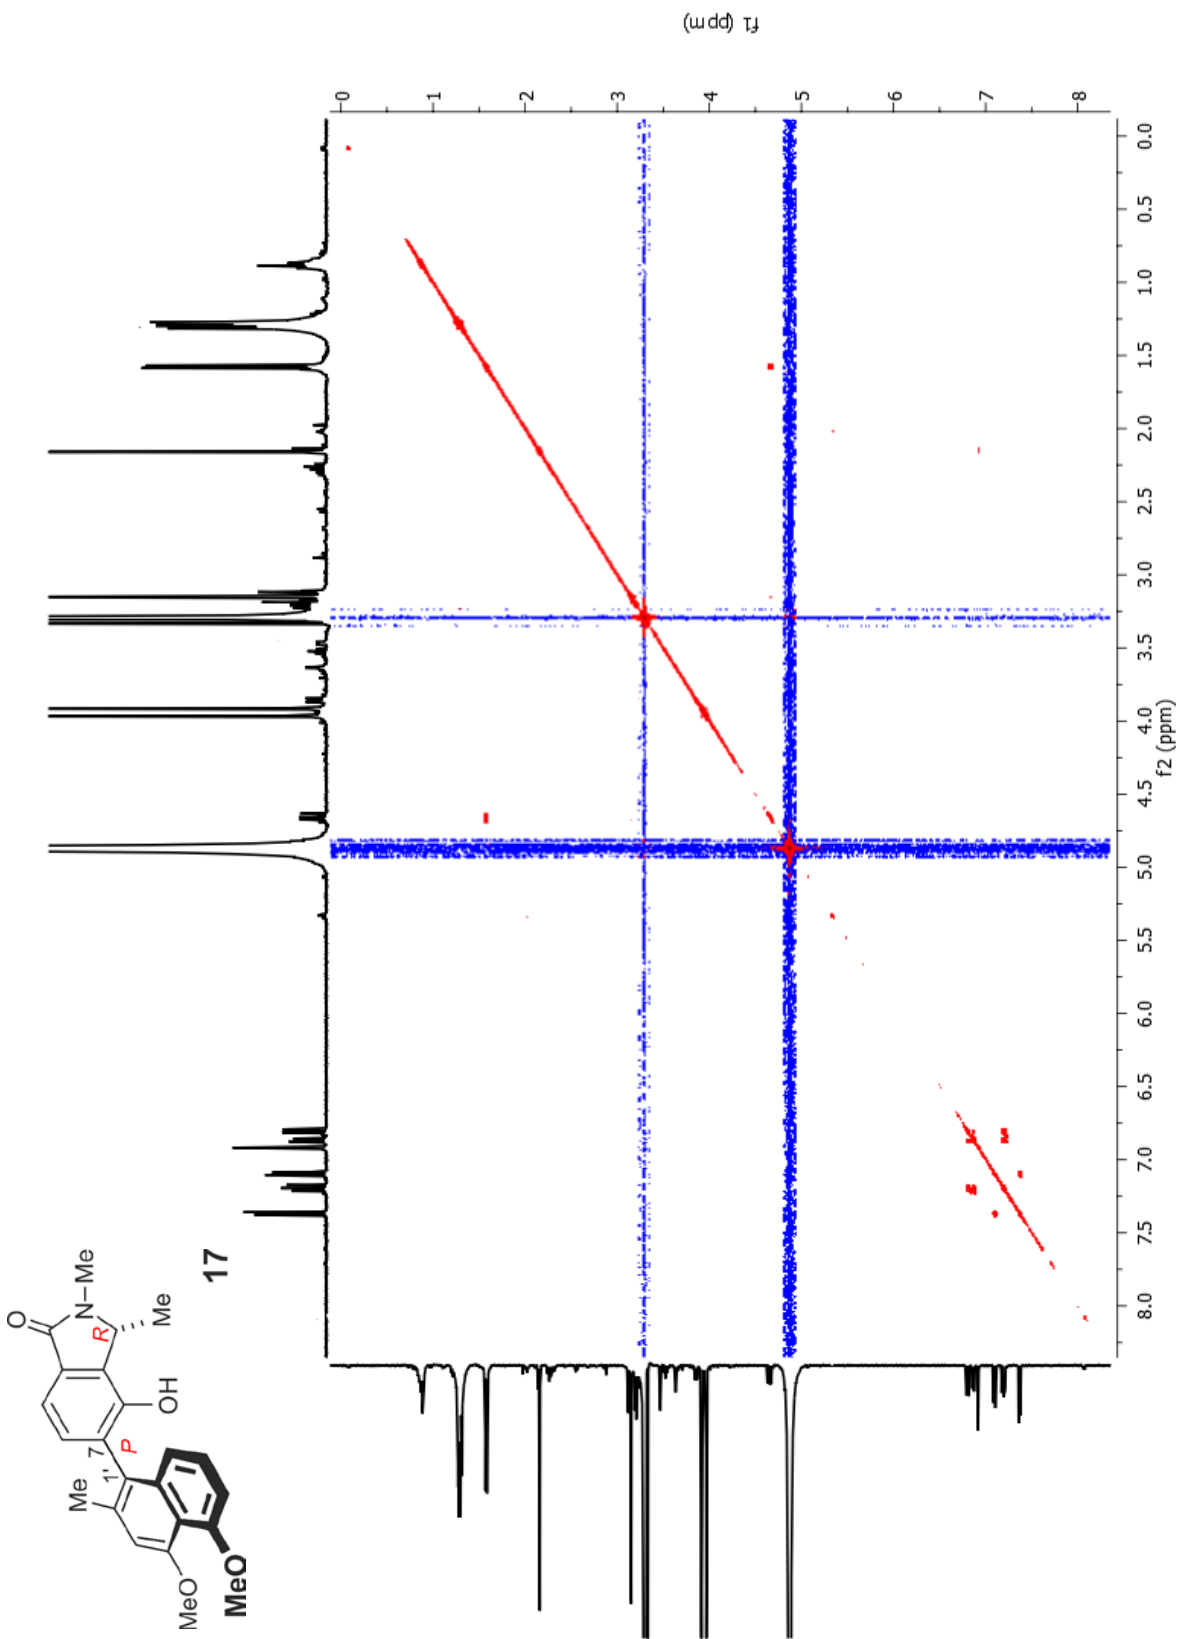

**Figure S37:**  $^1\text{H}$ - $^1\text{H}$  COSY spectrum of ancistrobrevoline D (17) in methanol- $d_4$ .

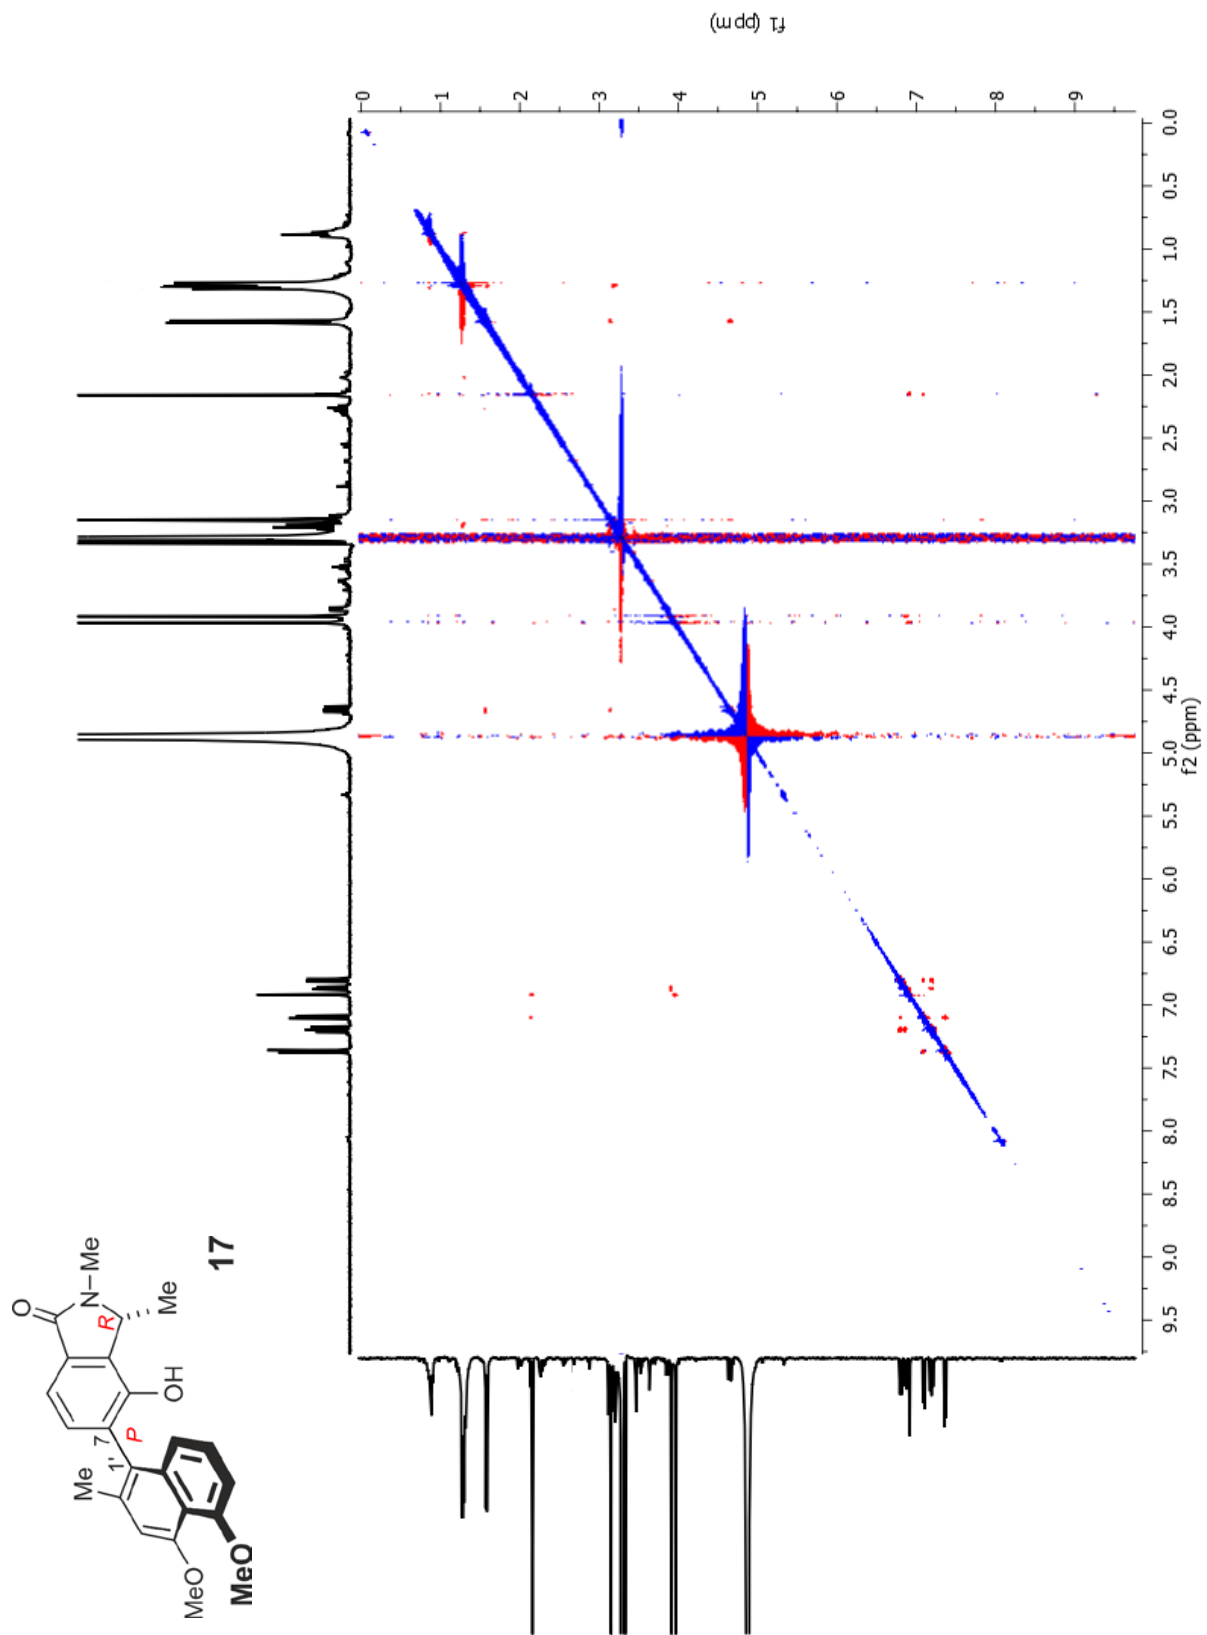

**Figure S38:**  $^1\text{H}$ - $^1\text{H}$  NOESY spectrum of ancistrobrevoline D (**17**) in methanol- $d_4$ .

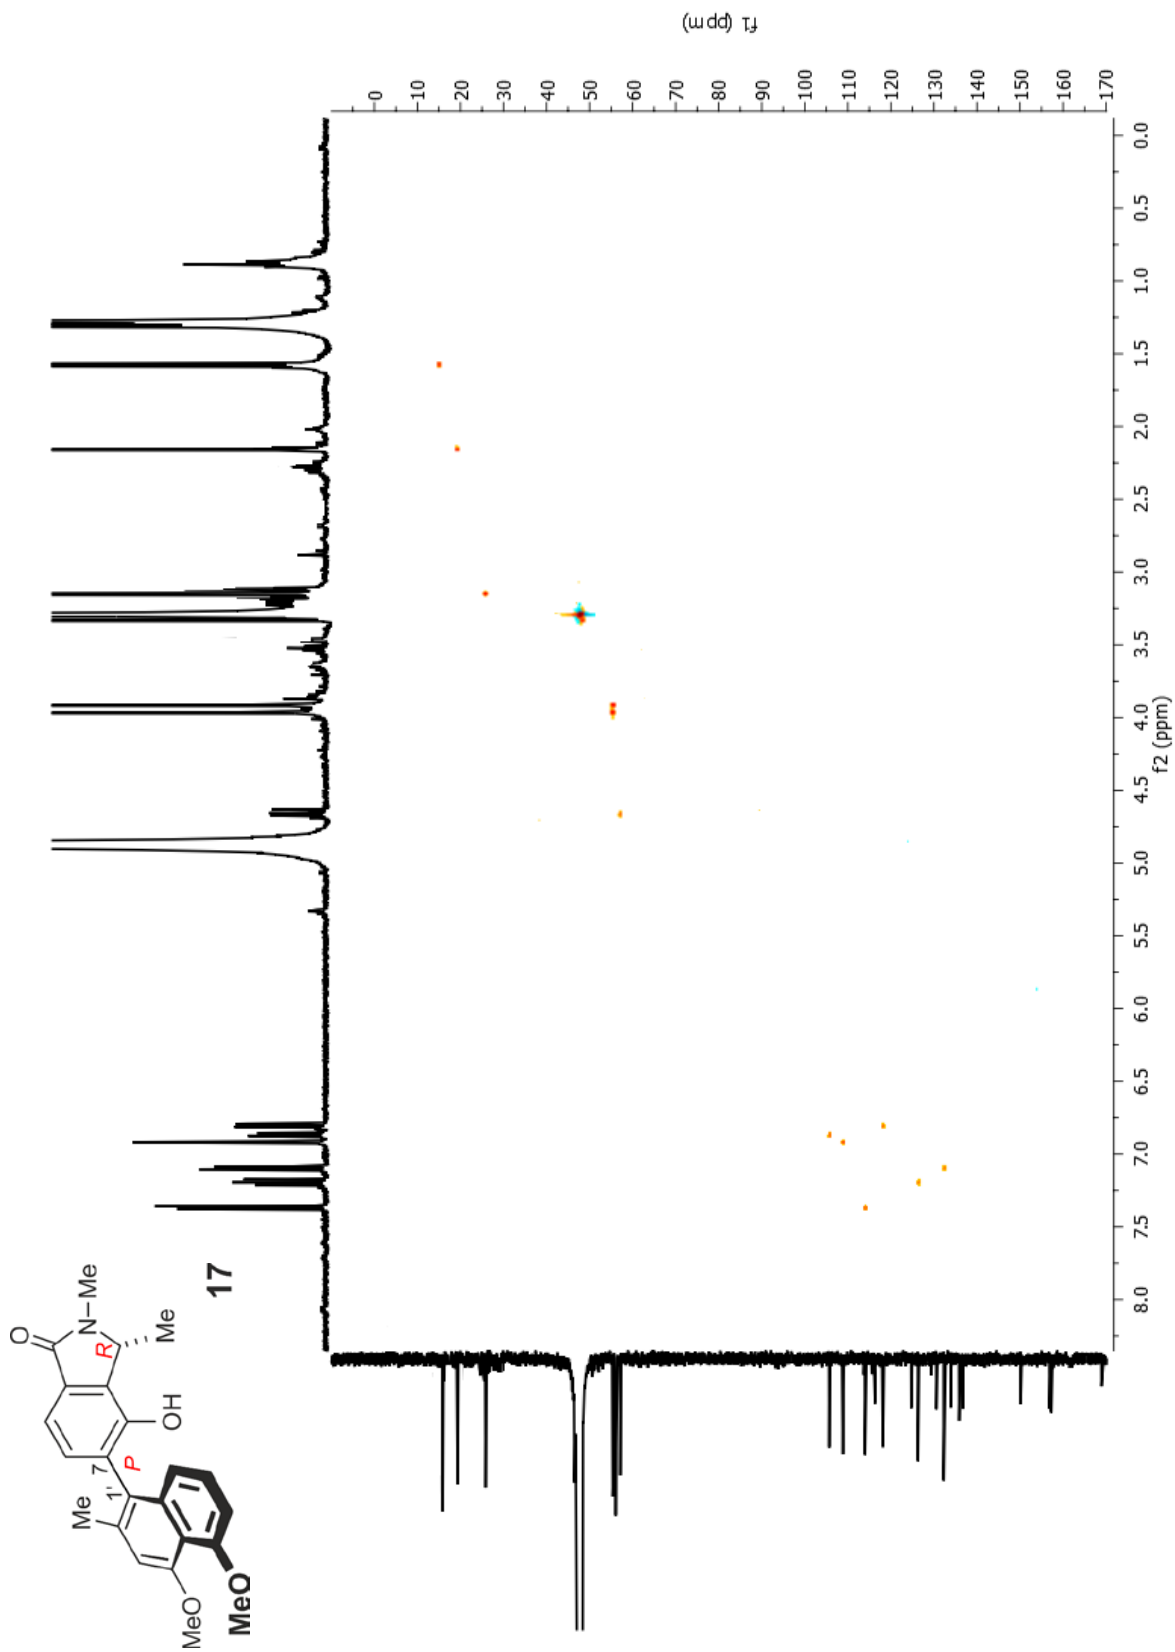

**Figure S39:**  $^1\text{H}$ - $^{13}\text{C}$  HSQC spectrum of ancistrobrevoline D (**17**) in methanol- $d_4$ .

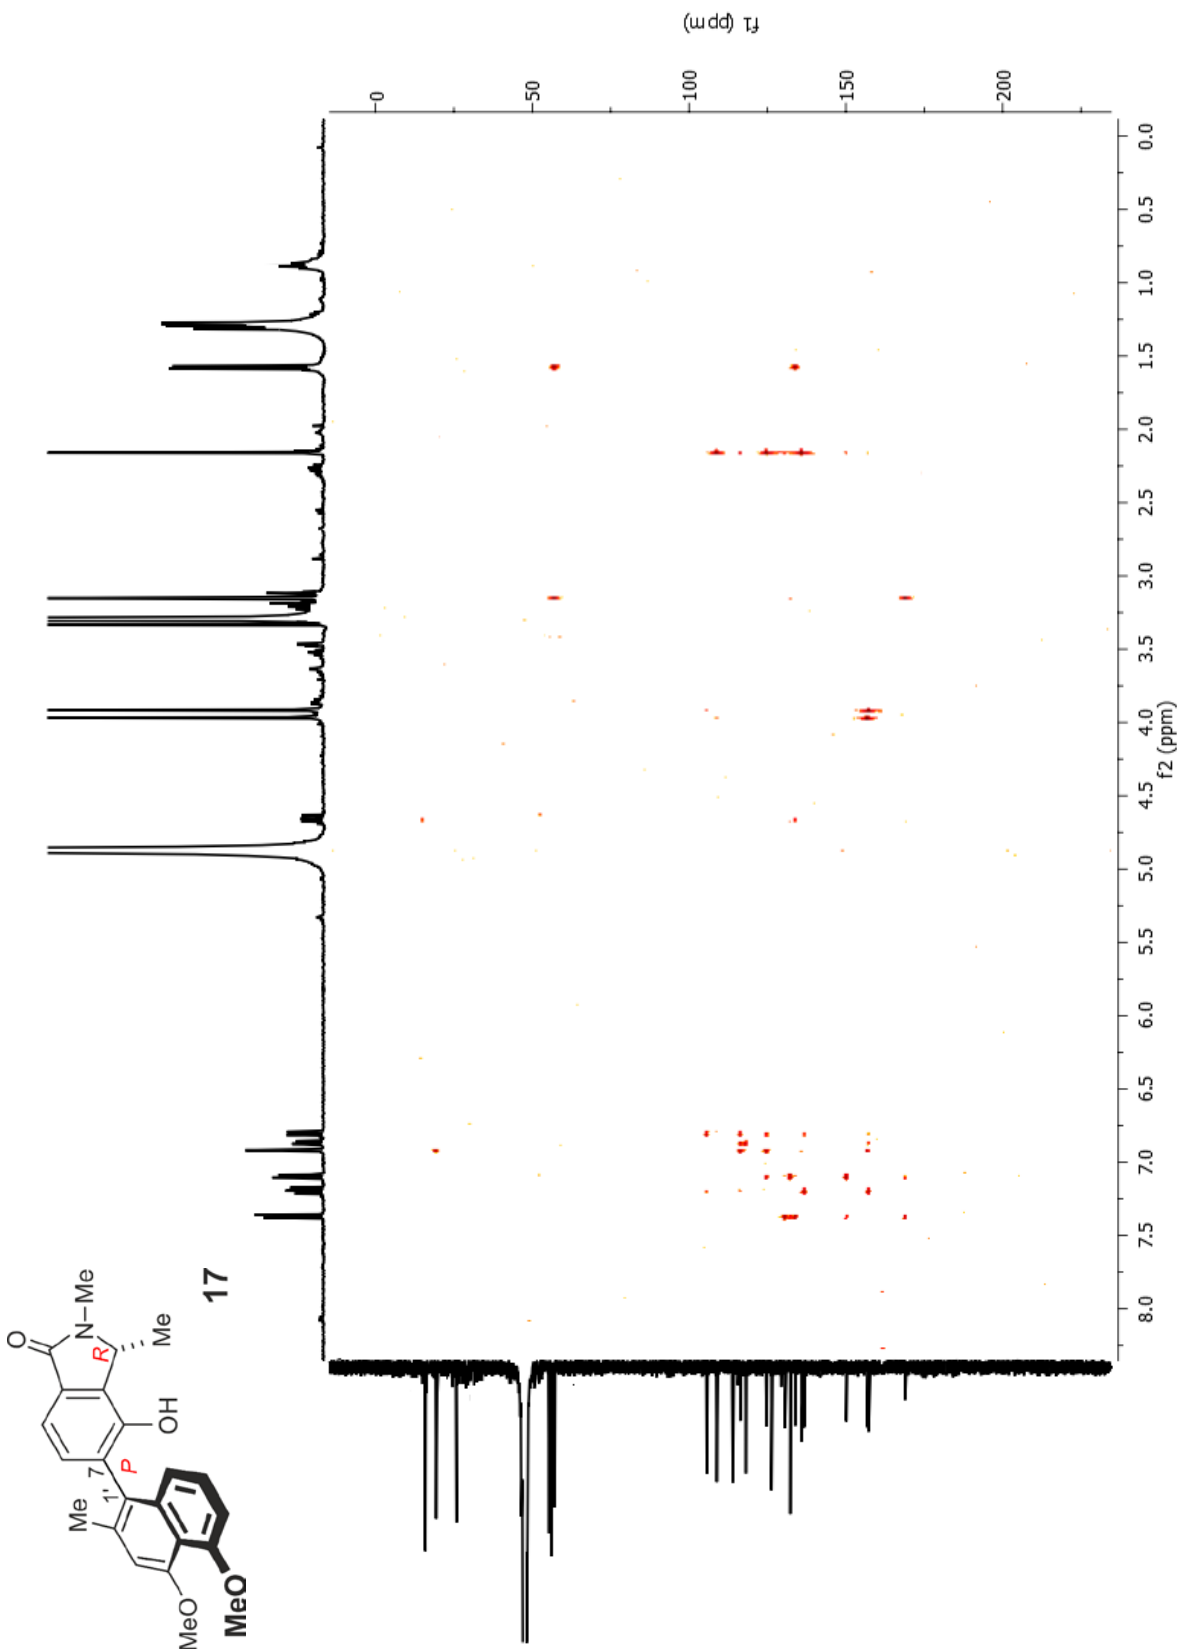

**Figure S40:**  $^1\text{H}$ - $^{13}\text{C}$  HMBC spectrum of ancistrobrevoline D (**17**) in methanol- $d_4$ .

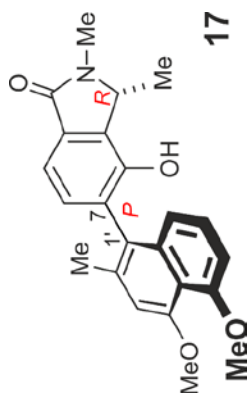

| Acquisition Parameter |            |
|-----------------------|------------|
| Source Type           | ESI        |
| Focus                 | Not active |
| Scan Begin            | 50 m/z     |
| Scan End              | 3500 m/z   |
| Ion Polarity          | Positive   |
| Set Funnel 1 RF       | 100.0 Vpp  |
| Set Funnel 2 RF       | 200.0 Vpp  |
| Set Hexapole RF       | 300.0 Vpp  |
| Set Nebulizer         | 0.3 Bar    |
| Set Dry Heater        | 200 °C     |
| Set Dry Gas           | 5.0 l/min  |
| Set Divert Valve      | Source     |

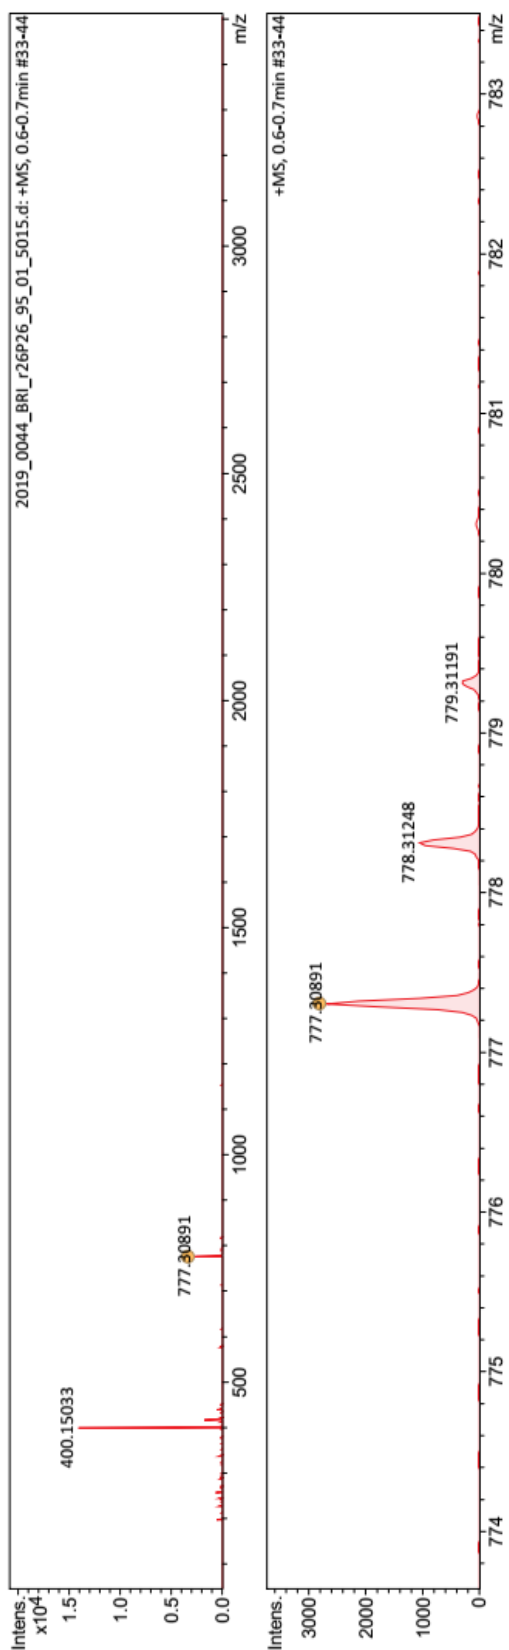

**Figure S41:** HR-ESI-MS spectrum of ancistrobrevoline D (**17**).

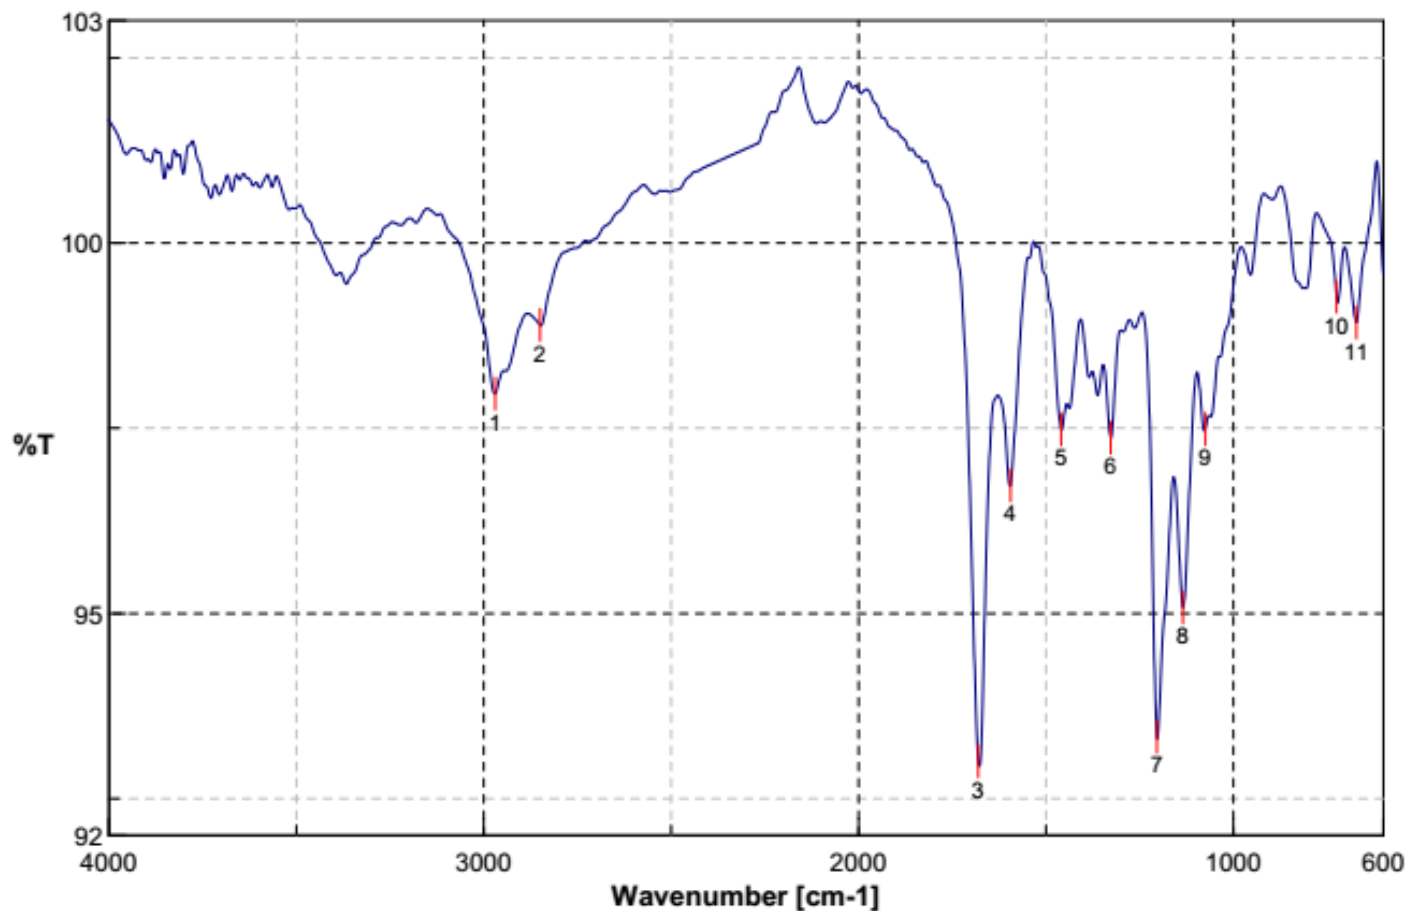

Accumulation 8  
 Resolution 4 cm<sup>-1</sup>  
 Zero Filling ON  
 Apodization Cosine  
 Gain Auto (4)  
 Scanning Speed Auto (2 mm/sec)  
 Date/Time 28.02.2019 9:22  
 Update 28.02.2019 10:57  
 Operator Student  
 File Name Memory#1  
 Sample Name  
 Comment

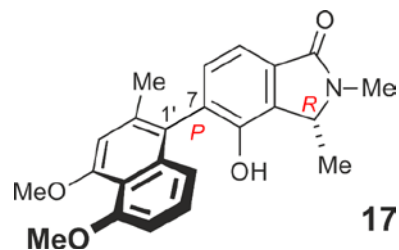

| No. | cm-1    | %T      | No. | cm-1    | %T      | No. | cm-1    | %T      |
|-----|---------|---------|-----|---------|---------|-----|---------|---------|
| 1   | 2969.84 | 97.9683 | 2   | 2850.27 | 98.8938 | 3   | 1680.66 | 93.0048 |
| 4   | 1594.84 | 96.73   | 5   | 1459.85 | 97.4823 | 6   | 1327.75 | 97.3716 |
| 7   | 1204.33 | 93.3327 | 8   | 1134.9  | 95.0794 | 9   | 1075.12 | 97.4866 |
| 10  | 725.104 | 99.2795 | 11  | 672.071 | 98.9257 |     |         |         |

**Figure S42:** IR spectrum of ancistrobrevoline D (**17**).

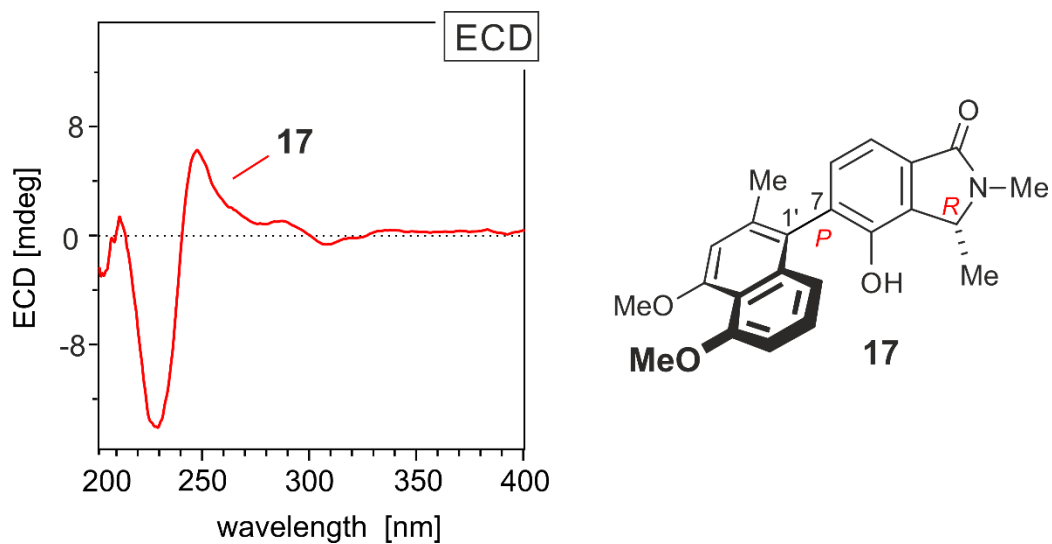

**Figure S43a:** ECD spectrum of ancistrobrevoline D (**17**).

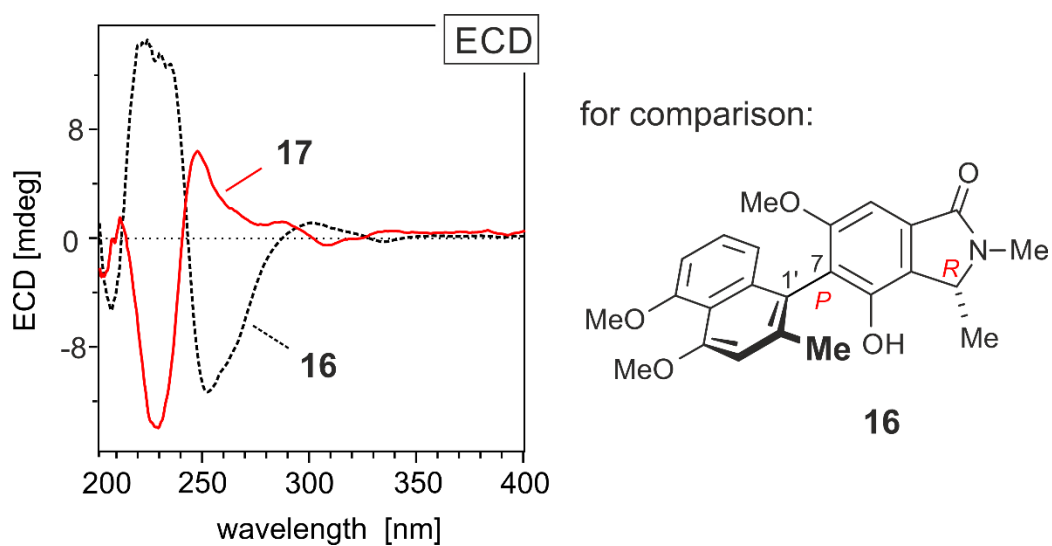

**Figure S43b:** Assignment of the absolute configuration of ancistrobrevoline D (**17**) by comparison of its ECD spectrum with that of ancistrobrevoline C (**16**).



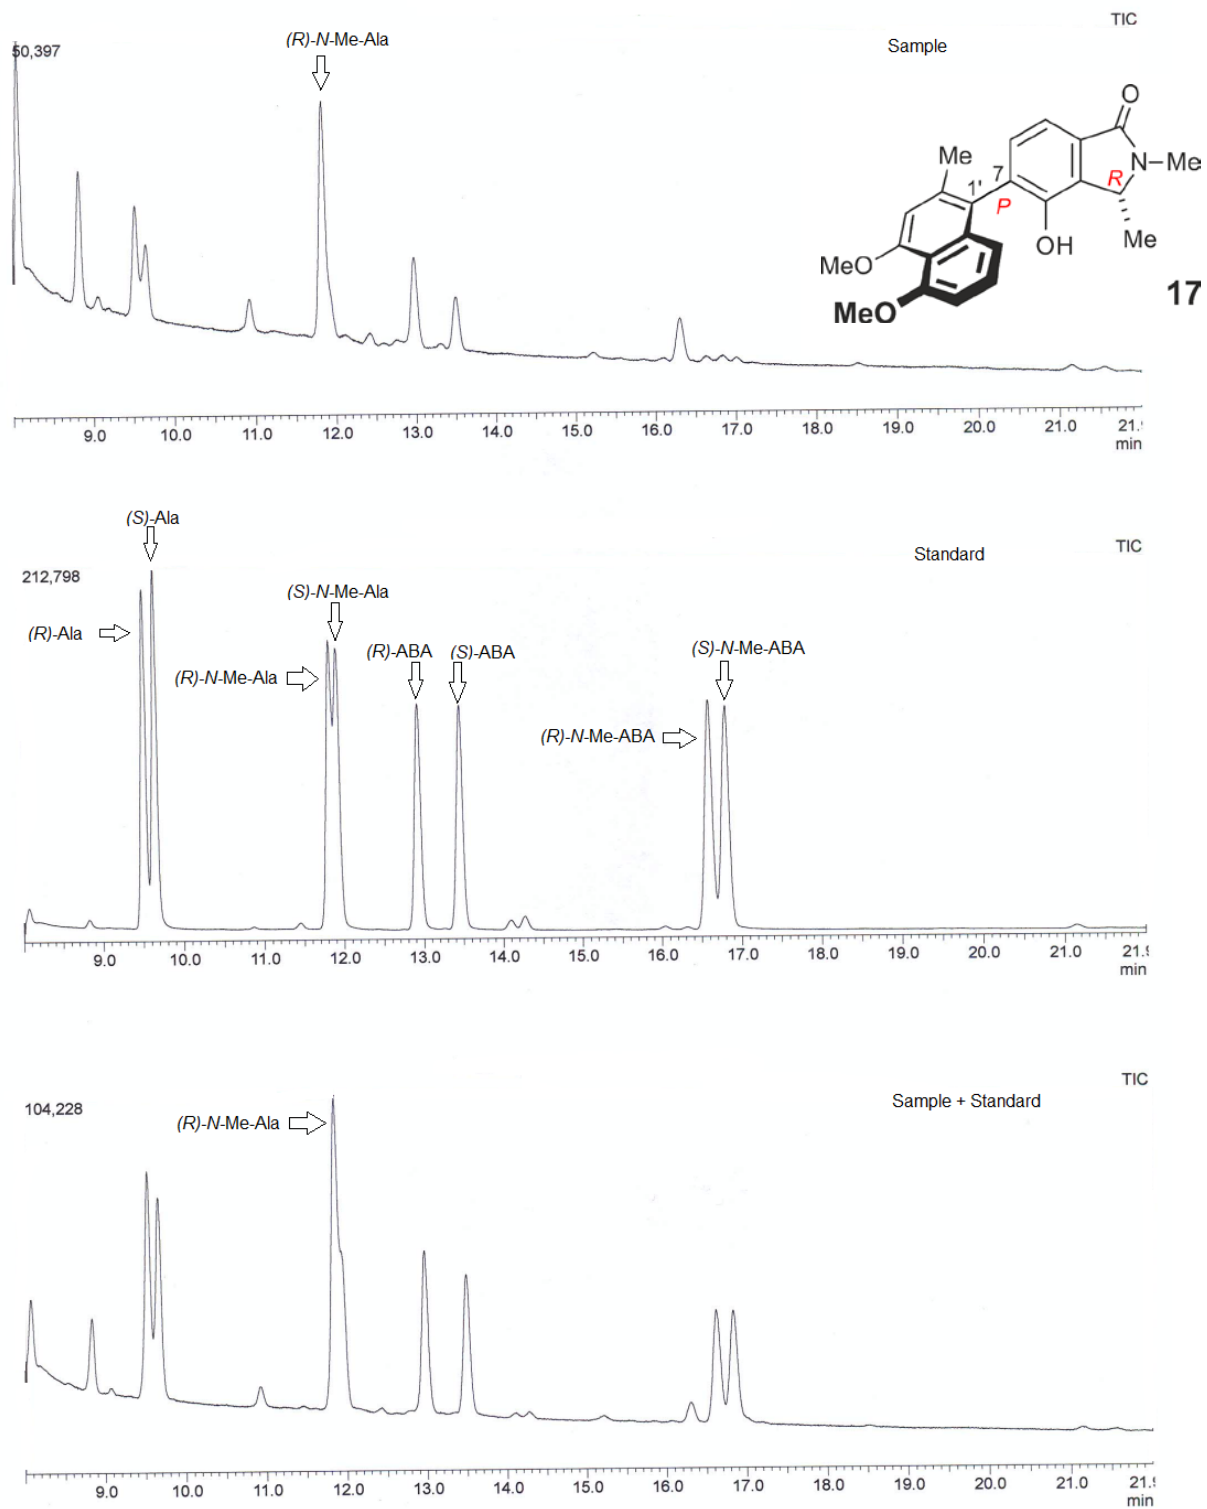

Ala = Alanine

*N*-Me-Ala = *N*-Methylalanine

ABA = 3-Aminobutyric acid

*N*-Me-ABA = *N*-Methyl-3-aminobutyric acid

**Figure S44:** Oxidative degradation of ancistrobrevoline D (17).
